# Supplementary material for: Epigenome-Wide Study Identifies Epigenetic Outliers in Normal Mucosa of Patients with Colorectal Cancer
Source: PubMed Central journal article supplement — Cancer Prev Res (Phila). 2022 Aug 25;15(11):755–66. doi: 10.1158/1940-6207.CAPR-22-0258 (PMC9623234; doi:10.1158/1940-6207.capr-22-0258), 2022-08-25
Supplement: capr-22-0258_supplementary_figure_2_suppsf2.pdf [file capr-22-0258_supplementary_figure_2_suppsf2.pdf]

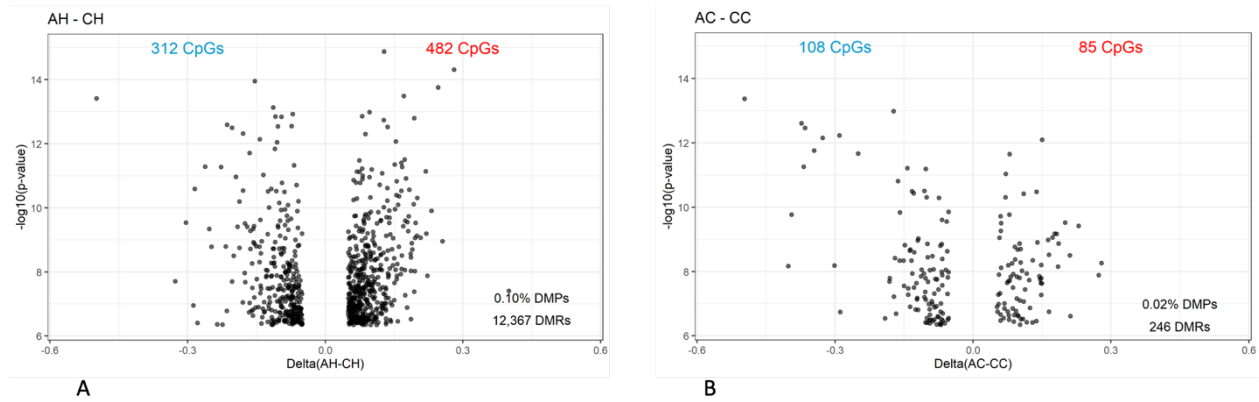

**Supplementary Figure 2: Differential methylation analyses of African Americans vs Caucasians.** Volcano plots showing differential methylation analyses of African Americans vs Caucasians in (A) Healthy controls; (B) Colon cancer patients. AH African American Healthy; CH Caucasian Healthy; AC African American Cancer; CC Caucasian Cancer; DMPs Differentially Methylated Positions; DMRs Differentially Methylated Regions.
