# Supplementary material for: Epigenome-Wide Study Identifies Epigenetic Outliers in Normal Mucosa of Patients with Colorectal Cancer
Source: Oxford University Press journal article supplement (doi:10.1158/1940-6207.capr-22-0258), 2022-08-25
Supplement: capr-22-0258_supplementary_table_3_suppst3.xlsx [file capr-22-0258_supplementary_table_3_suppst3.xlsx]

## Sheet: Updated Gene Analysis - Sig Gen
Supplementary Table 3: Differentially expressed genes between OMPs and non-
OMPs
Entrez ID	symbol	L2FC	pvalue	padj	-log10(padj)	Hypo CpGs	Hyper CpGs
23563	MUC17	-10.96	2.36e-27	2.48e-23	22.61	3	1
140453	TFF1	-10.31	7.94e-22	2.78e-18	17.56	1	8
55765	NR1I2	-7.26	4.05e-20	1.21e-16	15.92	1	5
9073	MYO7B	-7.7	4.24e-19	6.85e-16	15.16	1	4
4584	MUC12	-8.36	1.49e-18	2.05e-15	14.69	1	8
7031	RASEF	-6.56	2.92e-17	2.36e-14	13.63	1	2
8856	TMPRSS2	-7.73	7.74e-17	5.24e-14	13.28	1	2
54854	DDC	-6.34	1.48e-16	8.65e-14	13.06	2	9
254439	SLC13A2	-8.19	2.3e-16	1.27e-13	12.9	1	2
92291	ESPN	-6.03	4.84e-16	2.31e-13	12.64	4	1
337959	LIPH	-7.45	3.01e-15	1.07e-12	11.97	1	5
4648	EDN3	-6.52	3.94e-15	1.34e-12	11.87	3	1
81693	PKHD1L1	-6.39	6.31e-15	2.01e-12	11.7	1	1
57530	MYH14	-5.73	6.82e-15	2.04e-12	11.69	6	2
10071	CA1	-7.49	7.32e-15	2.08e-12	11.68	1	5
377841	LMO7	-6.07	7.2e-15	2.08e-12	11.68	1	9
54825	ANO9	-7.68	8.27e-15	2.28e-12	11.64	1	4
1577	SOWAHA	-7.01	1.18e-14	3.14e-12	11.5	1	1
6337	TMEM45B	-7.43	1.29e-14	3.38e-12	11.47	1	7
79574	ATP2C2	-7.65	3.06e-14	7.3e-12	11.14	3	4
80115	ADGRF1	-10.85	1.01e-13	2.1e-11	10.68	1	2
283358	BICDL2	-7.32	1.32e-13	2.56e-11	10.59	3	1
158158	SCNN1B	-5.1	1.83e-13	3.5e-11	10.46	5	6
85415	SLC6A19	-9.11	1.96e-13	3.71e-11	10.43	1	8
10050	LAD1	-6.91	3.5e-13	6.12e-11	10.21	1	2
11187	B3GALT5	-6.74	4.24e-13	7.25e-11	10.14	2	3
80117	MUC4	-7.89	4.73e-13	7.97e-11	10.1	1	7
7113	ATP10B	-6.35	6.12e-13	1e-10	10	2	1
84941	SCNN1G	-6.27	7.99e-13	1.21e-10	9.92	1	1
55057	HHLA2	-7.93	1.31e-12	1.85e-10	9.73	1	9
53841	GPR35	-5.36	1.46e-12	2.02e-10	9.69	2	4
166824	TTLL6	-8.19	2.41e-12	3.17e-10	9.5	1	2
1644	TMEM72	-8.44	4.88e-12	5.85e-10	9.23	1	6
25791	EPHA10	-6.2	1.17e-11	1.27e-09	8.9	6	2
9058	FOXD2	-5.59	1.19e-11	1.28e-09	8.89	1	2
388364	FAM83B	-6.55	1.41e-11	1.45e-09	8.84	2	3
4604	ARHGEF16	-5.74	1.46e-11	1.48e-09	8.83	1	5
92359	CD177	-8.65	1.75e-11	1.73e-09	8.76	2	3
644844	MYOM3	-6.96	2.97e-11	2.7e-09	8.57	2	2
283422	SLC4A4	-5.77	5e-11	4.27e-09	8.37	2	5
83715	TM4SF5	-6.74	5.29e-11	4.5e-09	8.35	1	6
4640	PDE6A	-6.75	9.05e-11	7.36e-09	8.13	1	4
346606	CHAD	-7.44	1.12e-10	8.85e-09	8.05	8	2
4583	CCL28	-6.01	1.2e-10	9.36e-09	8.03	1	5
1510	FOXA1	-6.7	1.51e-10	1.17e-08	7.93	4	1
5646	VSIG2	-7.05	1.61e-10	1.24e-08	7.91	3	1
79983	ARHGAP27	-5.31	2.12e-10	1.59e-08	7.8	3	14
55876	PTK6	-6.7	2.21e-10	1.64e-08	7.79	1	10
100505989	PLAC8	-6.88	2.34e-10	1.72e-08	7.76	1	4
5357	TSPAN1	-7.04	2.42e-10	1.78e-08	7.75	1	6
3866	CAPN12	-4.49	3.26e-10	2.34e-08	7.63	1	2
283460	COX6B2	-8.97	3.84e-10	2.67e-08	7.57	1	2
10083	HHIP	-6.65	4.08e-10	2.81e-08	7.55	1	1
6549	FAM110C	-5.87	5.06e-10	3.43e-08	7.47	3	1
200879	TMEM171	-6.92	5.85e-10	3.88e-08	7.41	1	1
3174	SYTL2	-5.02	7.9e-10	5.1e-08	7.29	3	8
5570	TM6SF2	-5.87	1.23e-09	7.59e-08	7.12	3	1
1908	KIF12	-7.13	1.32e-09	8.04e-08	7.09	1	3
113828	FAM177B	-5.49	1.38e-09	8.37e-08	7.08	1	3
79767	EPS8L1	-5.8	1.63e-09	9.85e-08	7.01	1	3
2524	AOC1	-6.63	1.77e-09	1.05e-07	6.98	2	3
93035	ATP2A3	-3.98	3.24e-09	1.83e-07	6.74	1	1
1308	RORC	-5.09	3.75e-09	2.1e-07	6.68	2	3
7498	GRB7	-6.82	3.99e-09	2.23e-07	6.65	1	4
105370070	TOX3	-5.36	4.58e-09	2.52e-07	6.6	1	4
79784	RBBP8NL	-6.88	4.82e-09	2.64e-07	6.58	1	10
92421	CXCL13	-9.66	5.63e-09	3e-07	6.52	1	1
140711	TTC22	-4.82	5.71e-09	3.04e-07	6.52	1	5
759	SMIM24	-5.57	5.9e-09	3.14e-07	6.5	2	5
4008	MUC5B	-6.46	6.93e-09	3.63e-07	6.44	1	4
58985	CEACAM7	-7.11	7.58e-09	3.9e-07	6.41	2	1
338440	SLC9A3R1	-4.71	7.92e-09	4.02e-07	6.4	2	1
255189	PLEKHA6	-3.9	1.1e-08	5.44e-07	6.26	9	12
3664	CWH43	-6.15	1.1e-08	5.45e-07	6.26	3	1
134548	PRLR	-3.95	1.36e-08	6.63e-07	6.18	1	13
120224	CXCL2	5.54	2.02e-08	9.51e-07	6.02	2	3
248	ARHGEF38	-7.65	2.07e-08	9.74e-07	6.01	1	8
415117	AMOTL2	2.35	2.2e-08	1.03e-06	5.99	1	4
51195	EXOC3L4	-4.27	2.27e-08	1.06e-06	5.98	1	2
57662	FER1L6	-7.64	2.33e-08	1.08e-06	5.97	3	3
9914	MLPH	-5.73	2.71e-08	1.24e-06	5.91	1	1
79838	SLC6A20	-5.73	3.09e-08	1.4e-06	5.85	1	1
10279	MAP7	-3.54	3.8e-08	1.68e-06	5.77	8	6
79849	SLC23A3	-4.9	3.85e-08	1.7e-06	5.77	1	2
126353	EPHA1	-5.6	4.59e-08	1.99e-06	5.7	1	4
10223	ZC3H12D	-4.5	4.72e-08	2.03e-06	5.69	4	13
27035	LRATD1	-4.2	5.47e-08	2.31e-06	5.64	6	1
654346	TMPRSS6	-7.02	6.04e-08	2.53e-06	5.6	1	2
1365	GPR55	-6.87	6.59e-08	2.73e-06	5.56	1	4
222171	SLC5A1	-6.17	7.55e-08	3.09e-06	5.51	2	3
266977	CALML4	-4.23	8.02e-08	3.24e-06	5.49	1	3
388743	MALL	-5.54	8.92e-08	3.56e-06	5.45	2	1
84366	RAB37	-2.98	1.14e-07	4.4e-06	5.36	6	2
10045	ST3GAL4	-3.75	1.19e-07	4.58e-06	5.34	8	14
126695	BIK	-5.15	1.33e-07	5.08e-06	5.29	1	8
4486	XIRP1	7.34	1.53e-07	5.72e-06	5.24	1	2
155465	ILDR1	-6.16	1.59e-07	5.91e-06	5.23	1	2
146439	PTPN3	-3.95	1.6e-07	5.93e-06	5.23	2	6
55359	PRSS22	-9.18	1.68e-07	6.2e-06	5.21	2	2
6338	PLEKHA7	-4	1.95e-07	7.1e-06	5.15	1	3
340024	THBS1	3.36	2.01e-07	7.31e-06	5.14	5	2
3172	SLC37A1	-3.64	2.06e-07	7.46e-06	5.13	4	4
3960	FEV	-7.8	2.12e-07	7.69e-06	5.11	1	1
3880	MCTP2	-5.19	2.33e-07	8.34e-06	5.08	2	5
8537	C2orf88	-4.08	2.37e-07	8.45e-06	5.07	2	6
84699	ABO	-5.2	2.85e-07	9.98e-06	5	1	1
152519	THSD4	-3.18	2.87e-07	1e-05	5	4	2
3898	SCEL	-8.19	3.21e-07	1.1e-05	4.96	1	3
3993	FETUB	-7.79	3.36e-07	1.15e-05	4.94	2	1
55808	ATP8B1	-4	3.9e-07	1.31e-05	4.88	1	11
10317	MUC20	-6.14	4.24e-07	1.41e-05	4.85	1	4
9245	CAPN5	-3.42	4.65e-07	1.53e-05	4.82	1	5
4585	RASSF7	-5.42	5e-07	1.62e-05	4.79	1	3
55561	FAM160A1	-4.49	7.24e-07	2.26e-05	4.65	1	10
688	FAAH	-3.63	7.37e-07	2.29e-05	4.64	1	1
23120	CA4	-5.77	9.6e-07	2.92e-05	4.53	1	1
27134	SSUH2	-4.61	9.95e-07	3.01e-05	4.52	1	5
221393	BLK	-6.78	1.04e-06	3.14e-05	4.5	1	2
56667	ABHD3	-4.6	1.07e-06	3.21e-05	4.49	1	3
26298	DSC2	-5.39	1.12e-06	3.37e-05	4.47	1	1
91703	SCML4	-4.91	1.15e-06	3.45e-05	4.46	1	8
202915	LYPD6B	-6.07	1.23e-06	3.66e-05	4.44	2	10
3856	RAB11FIP4	-3.54	1.24e-06	3.68e-05	4.43	1	1
79098	NT5C3A	-2.72	1.31e-06	3.85e-05	4.41	1	4
6340	TPD52	-3.17	1.41e-06	4.15e-05	4.38	1	4
6534	GOLT1A	-6.89	1.44e-06	4.23e-05	4.37	6	2
79908	PBLD	-3.62	1.47e-06	4.29e-05	4.37	2	4
10110	CYP2S1	-5.44	1.68e-06	4.85e-05	4.31	1	1
440603	MAFF	2.44	1.93e-06	5.5e-05	4.26	1	1
8492	MAP3K9	-2.82	2.29e-06	6.41e-05	4.19	1	5
100130933	SSTR1	-3.85	2.48e-06	6.91e-05	4.16	4	1
54827	ZAP70	-4	2.58e-06	7.17e-05	4.14	1	3
11148	PAQR8	-3.47	2.96e-06	8.12e-05	4.09	1	9
10331	SIPA1L3	-2.84	3.34e-06	9.01e-05	4.05	8	17
2859	ITM2C	-3.01	3.47e-06	9.33e-05	4.03	4	3
1573	CNR2	-6.42	3.59e-06	9.58e-05	4.02	4	6
1943	VAV3	-4.7	3.65e-06	9.72e-05	4.01	1	1
165545	HAPLN1	-5.94	4.29e-06	0.000112	3.95	2	8
3291	NCCRP1	-6.85	5.02e-06	0.000128	3.89	2	3
57016	VWA3B	-4.68	5.18e-06	0.000132	3.88	1	4
128218	PAG1	-3.96	5.36e-06	0.000136	3.87	1	8
284076	YBX2	-4.11	5.42e-06	0.000137	3.86	1	3
57715	ARTN	-3.06	5.43e-06	0.000137	3.86	1	3
54857	LPAR5	-4.24	5.93e-06	0.000149	3.83	1	10
55532	DUSP1	2.58	6.03e-06	0.00015	3.82	1	7
55040	SMPD3	-3.97	7.06e-06	0.000173	3.76	9	8
10753	CARD10	-2.91	7.1e-06	0.000174	3.76	1	2
64284	SLC5A12	-6.62	8.64e-06	0.000206	3.69	1	1
54546	IGF2BP2	-3.22	8.96e-06	0.000213	3.67	2	4
389384	OCIAD2	-3.1	9.23e-06	0.000218	3.66	1	6
999	IL6	5.85	9.68e-06	0.000228	3.64	1	1
440335	SHROOM1	-3.59	1.03e-05	0.00024	3.62	1	4
643236	POU2AF1	-4.55	1.06e-05	0.000246	3.61	2	1
23086	MAST4	1.53	1.32e-05	0.0003	3.52	9	1
50506	SP6	-3.58	1.34e-05	0.000303	3.52	7	3
1576	CDA	-4.78	1.36e-05	0.000306	3.51	2	2
1159	PRKCZ	-3.22	1.38e-05	0.000309	3.51	28	12
1811	NEURL1	-3.7	1.44e-05	0.000321	3.49	1	2
9153	TMEM139	-4.86	1.48e-05	0.000328	3.48	3	8
50853	C5orf66	-3.84	1.61e-05	0.000354	3.45	1	34
64073	SH3BGRL2	-2.9	1.75e-05	0.000381	3.42	1	2
10022	PCSK7	-2.71	1.91e-05	0.000411	3.39	1	1
5349	CD300E	5.4	2.01e-05	0.000429	3.37	1	1
1525	CCDC149	1.43	2.03e-05	0.000432	3.36	4	4
284656	ITPRIP	3	2.26e-05	0.000476	3.32	18	1
388595	ABHD12B	-7.69	2.42e-05	0.000504	3.3	4	4
1015	SLC18A1	-6.77	2.43e-05	0.000506	3.3	1	1
2306	KRT1	-5.16	2.57e-05	0.00053	3.28	1	3
79782	RETREG1	-2.96	2.7e-05	0.000553	3.26	1	5
55620	TWIST2	3.56	2.79e-05	0.000569	3.24	1	1
9721	ZNF101	-2.27	3.01e-05	0.000607	3.22	1	1
10595	CARD11	-4.16	3.35e-05	0.00067	3.17	2	16
343	TESPA1	-4.15	3.64e-05	0.000716	3.15	3	2
8437	PLEKHG7	-5.73	3.72e-05	0.000726	3.14	1	6
1999	PYY	-5.21	3.9e-05	0.000761	3.12	1	3
222584	LARGE2	-3.93	4.02e-05	0.000779	3.11	1	2
1364	ABCG2	-4.78	4.39e-05	0.00084	3.08	8	4
27237	TRIM15	-6.26	4.7e-05	0.000893	3.05	2	24
79152	LZTS1	2.62	4.87e-05	0.00092	3.04	3	1
1366	RDH13	-5.82	4.91e-05	0.000927	3.03	1	3
2810	MMP19	4.5	5.04e-05	0.000946	3.02	4	1
392465	SIGLEC10	-3.73	5.09e-05	0.000951	3.02	3	2
9615	MOB3B	-2.64	5.14e-05	0.00096	3.02	1	4
57126	STARD10	-2.88	5.27e-05	0.000982	3.01	2	5
120400	ZNF91	-2.61	5.59e-05	0.00104	2.98	4	2
119467	IL11	5.35	5.89e-05	0.00108	2.97	1	1
27284	RFX2	2.26	5.95e-05	0.00109	2.96	9	3
1832	NR1H4	-4.07	6.11e-05	0.00112	2.95	1	1
150538	GFUS	-3.64	6.19e-05	0.00113	2.95	1	1
5408	TRIM36	-3.52	6.32e-05	0.00115	2.94	1	6
57549	HIC1	2.49	6.45e-05	0.00117	2.93	3	4
124975	KLK10	-3.64	6.48e-05	0.00117	2.93	1	4
11005	NAPSA	-2.91	6.7e-05	0.00121	2.92	1	4
84419	NTNG1	3.11	6.72e-05	0.00121	2.92	1	1
140803	CRACR2A	-2.22	6.76e-05	0.00122	2.92	1	11
4224	NGF	3.56	6.8e-05	0.00122	2.91	7	4
23491	SLC35D1	-2.82	6.99e-05	0.00125	2.9	1	1
127294	HOXD1	-2.59	6.99e-05	0.00125	2.9	4	2
54860	SDCBP2	-5.83	7.02e-05	0.00125	2.9	3	7
339977	ZYG11A	-6.51	7.53e-05	0.00133	2.88	1	2
2528	JCHAIN	-4.65	7.64e-05	0.00134	2.87	2	1
7429	COL1A1	3.76	7.71e-05	0.00135	2.87	8	3
2525	NFIL3	2.75	8.1e-05	0.0014	2.85	1	2
54979	GAL3ST2	-6.04	8.13e-05	0.00141	2.85	1	7
4072	PLEKHM1	-5.3	8.16e-05	0.00141	2.85	1	2
55018	CASP7	-3.28	8.29e-05	0.00143	2.84	4	2
2984	PTK2B	-2.26	8.41e-05	0.00144	2.84	2	13
10917	PTPRR	-4.26	8.55e-05	0.00146	2.83	12	3
23624	PHF13	1.79	8.87e-05	0.00151	2.82	2	1
8671	ADAP1	-2.2	9.61e-05	0.00162	2.79	6	17
9032	PIP5K1B	-3.17	0.000100015	0.00167	2.78	1	6
57402	JPH1	-2.18	0.00010055	0.00168	2.78	2	2
5307	CSRNP1	2.2	0.000110091	0.00181	2.74	3	2
55600	OSMR	3.2	0.000112087	0.00183	2.74	8	1
3875	DLGAP3	1.58	0.000123844	0.00199	2.7	1	1
5794	DGKA	-2.75	0.000129451	0.00206	2.69	3	8
5145	BCL2L10	-4.23	0.000130538	0.00207	2.68	2	1
124056	KIF21B	-3.03	0.000132788	0.0021	2.68	1	4
63928	FOXL1	-3.53	0.000137312	0.00216	2.66	5	1
130367	RGS16	3.33	0.000138444	0.00218	2.66	1	2
645121	LINC00114	-5.21	0.000139899	0.0022	2.66	2	1
220963	COLEC12	3.4	0.000140843	0.00221	2.66	1	1
80004	APOLD1	3.41	0.000144015	0.00225	2.65	2	2
5003	H3C10	-3.51	0.000146688	0.00229	2.64	1	1
1101	ACAP1	-2.97	0.000147397	0.00229	2.64	2	1
6927	PTGS2	4.36	0.000148426	0.00231	2.64	2	1
56477	SIGIRR	-2.2	0.000151171	0.00235	2.63	3	5
2877	CDC25B	1.06	0.000151828	0.00235	2.63	1	4
3169	NLRC5	-2.09	0.000153637	0.00238	2.62	1	1
64787	PCK2	-2.85	0.000157264	0.00242	2.62	1	4
23584	PDPN	3.7	0.000163976	0.00251	2.6	14	2
80323	KIF22	-1.92	0.00017269	0.00261	2.58	3	1
5243	CXCL3	5.05	0.000180354	0.00271	2.57	1	2
3491	SLC52A3	-3.97	0.000193917	0.00289	2.54	1	9
345079	FMO2	5.44	0.000194125	0.00289	2.54	4	2
64922	THBS2	4.17	0.000206726	0.00305	2.52	5	1
162514	SLC44A4	-7.17	0.000217387	0.00319	2.5	1	8
201176	CDH11	2.38	0.000227026	0.00331	2.48	8	1
100129046	SERPINH1	2.68	0.000228139	0.00332	2.48	5	1
5753	USP53	-2.48	0.000229799	0.00334	2.48	1	2
1080	TBX3	1.91	0.000245112	0.00352	2.45	1	1
51316	MAGEL2	3	0.000247319	0.00354	2.45	1	3
10103	FFAR3	3.08	0.000259481	0.00368	2.43	2	1
3957	HS3ST1	-2.24	0.000260246	0.00369	2.43	6	6
5652	TMEM45A	3.39	0.000265767	0.00376	2.42	3	1
401409	MCU	-2.3	0.000283002	0.00398	2.4	2	2
147968	CENPV	-2.01	0.000300919	0.00417	2.38	1	4
101929549	S100A9	4.52	0.000309474	0.00428	2.37	2	4
2150	ADRB1	2.41	0.000314418	0.00433	2.36	3	1
257629	DLC1	2.92	0.00032214	0.00442	2.35	8	1
548596	NCKAP5	-2.5	0.00033155	0.00452	2.35	1	6
101929395	B4GALNT2	-4.3	0.000346952	0.0047	2.33	1	5
131177	ZNF69	-2.55	0.000349515	0.00472	2.33	2	1
125965	PTH1R	2.52	0.000362556	0.00485	2.31	1	4
2591	CD300LG	5.52	0.000386814	0.00511	2.29	7	1
10653	BACH1	1.22	0.00038953	0.00513	2.29	2	2
64399	RHEX	-3.4	0.000393683	0.00518	2.29	1	2
132014	LIN7A	2.69	0.000398506	0.00524	2.28	3	4
3158	LRATD2	-2.13	0.000402534	0.00528	2.28	1	1
3706	WNT4	-2.4	0.000413868	0.00539	2.27	1	3
3219	SHISAL2A	-5.38	0.000415118	0.00541	2.27	1	2
11074	CD160	-5	0.000418926	0.00544	2.26	2	3
642273	LSMEM1	-2.95	0.000429691	0.00556	2.26	2	1
79370	FAM110B	2.63	0.000441359	0.00567	2.25	3	14
123264	EXD3	-1.77	0.000442351	0.00568	2.25	1	4
91862	ZFYVE27	-2.23	0.000449055	0.00575	2.24	1	1
54836	EGFLAM	2.59	0.000451327	0.00577	2.24	8	2
3549	RD3	-4.87	0.000457328	0.00584	2.23	1	2
134285	LRRC8D	-2.33	0.00045891	0.00586	2.23	5	7
22802	KDM6B	1.8	0.000461384	0.00588	2.23	4	3
100133941	PLCH2	-5.53	0.00046316	0.00589	2.23	1	3
22977	NOSTRIN	-3.59	0.000471645	0.00598	2.22	2	9
6286	POU5F1	-6.08	0.000478498	0.00603	2.22	3	2
22996	FGF14	2.6	0.000494295	0.00619	2.21	1	1
161291	HOMER1	2.8	0.000507802	0.00632	2.2	3	1
54843	NAV1	1.49	0.000513475	0.00637	2.2	2	8
2168	DCUN1D3	1.96	0.000528919	0.00654	2.18	3	2
56159	IL1R1	2.81	0.000531165	0.00656	2.18	2	8
5017	ACVR1	1.49	0.000531557	0.00656	2.18	7	1
79861	TDGF1	-3.7	0.000569008	0.00694	2.16	1	1
1259	MYO3A	-5.48	0.000575811	0.00701	2.15	3	1
6564	ITPRID2	-2.24	0.000588389	0.00715	2.15	1	1
3694	EDN2	-4.35	0.000592082	0.00718	2.14	1	2
388341	SPECC1	-2.13	0.000597489	0.00723	2.14	6	6
53345	VIM	3.13	0.000599996	0.00725	2.14	1	1
6928	MRM1	-2.03	0.000609689	0.00733	2.13	2	1
113220	DLGAP1	2.81	0.000629927	0.00752	2.12	4	9
400823	SMPDL3A	-3.62	0.000645939	0.00768	2.11	1	4
54869	CCR6	-4.08	0.000651575	0.00774	2.11	1	10
54894	VCAN	3.55	0.000660926	0.00784	2.11	3	3
100506658	NADSYN1	-2.52	0.000669017	0.00792	2.1	1	5
1836	ITGB7	-3.44	0.000671487	0.00794	2.1	1	4
2330	ACTL8	-6.43	0.000675545	0.00798	2.1	1	2
81706	PDE9A	-2.35	0.000678456	0.00801	2.1	11	9
26	P2RX1	-1.65	0.000685809	0.00808	2.09	1	3
1048	TTC39B	-1.85	0.000690974	0.00813	2.09	1	2
26762	CES4A	-2.48	0.000701688	0.00823	2.08	2	3
10	C21orf58	-1.6	0.000721283	0.0084	2.08	1	3
92211	SH2D7	-5.8	0.000722088	0.00841	2.08	1	4
171022	ABL2	2.72	0.000725666	0.00843	2.07	1	4
2863	CALML6	-3.78	0.000727567	0.00845	2.07	1	1
3728	DGKI	2.44	0.000792017	0.00905	2.04	4	2
84873	ERBB2	-2.22	0.000804667	0.00918	2.04	2	9
5639	BATF3	2.96	0.000824885	0.00938	2.03	1	1
57111	FGGY	1.28	0.000834559	0.00946	2.02	1	2
79981	ELN	2.66	0.000838406	0.0095	2.02	7	2
1044	DENND1B	-2.22	0.000842035	0.00953	2.02	1	8
387695	TMEM144	-2.94	0.000863814	0.00973	2.01	1	3
489	PAK4	-1.53	0.000875987	0.00984	2.01	1	11
389434	RASL10B	3.79	0.000905676	0.01	2	2	1
6097	C1S	2.77	0.000906049	0.01	2	9	2
1562	YBX3	1.91	0.000928978	0.01	1.99	1	1
2886	WWP2	-1.91	0.000928806	0.01	1.99	10	7
79170	TP53INP1	-2.2	0.000937258	0.01	1.98	1	2
56649	CEACAM21	-5.62	0.000953893	0.011	1.98	6	4
10256	TNFRSF9	-4.31	0.000964163	0.011	1.97	1	5
27324	FNDC4	2.96	0.000982236	0.011	1.97	2	1
140893	PRR5L	-3.73	0.00100197	0.011	1.96	2	7
54933	PARP4	-2.16	0.00103168	0.011	1.95	1	3
2169	DPYSL2	1.99	0.0010429	0.011	1.94	1	4
79949	STK38L	1.14	0.00104753	0.011	1.94	2	6
25803	CABYR	1.79	0.00106497	0.012	1.94	1	4
150000	LCOR	-1.87	0.0011266	0.012	1.92	5	6
6692	ADAT3	-1.99	0.00116902	0.012	1.9	1	5
10563	KRT9	-5.19	0.00117459	0.013	1.9	3	1
55001	CYP19A1	4.49	0.00118198	0.013	1.9	3	8
284422	TCL1A	-5.79	0.00118368	0.013	1.9	4	3
9982	PLEKHM2	1.16	0.00118498	0.013	1.9	1	1
100129480	SLC22A23	-2.31	0.00118632	0.013	1.9	1	8
4680	HIVEP2	1.33	0.00118778	0.013	1.9	3	14
55286	MIA2	-2.03	0.00120685	0.013	1.89	1	2
727897	FCN1	3.37	0.00121131	0.013	1.89	1	1
126859	NHEJ1	-2.03	0.00123525	0.013	1.89	1	1
3816	GPR160	-3.39	0.00124021	0.013	1.89	1	13
84830	PDK1	-1.39	0.00129044	0.013	1.87	1	1
54866	NEK3	-2.42	0.00129772	0.013	1.87	1	5
7364	RETN	7.28	0.00131001	0.014	1.87	3	1
1087	HAS3	-2.94	0.00131121	0.014	1.87	1	2
8842	MFAP2	3.19	0.00133368	0.014	1.86	3	4
3170	FAM118B	-1.63	0.0013367	0.014	1.86	1	3
9368	PTGIS	2.97	0.00135795	0.014	1.86	1	1
150209	RPS6KA1	-3.38	0.0013987	0.014	1.84	1	2
23314	RAB3IP	-1.87	0.00141563	0.014	1.84	1	1
11227	SEC14L2	1.69	0.00142365	0.014	1.84	2	3
347735	VWF	3.16	0.00143734	0.015	1.84	2	1
634	MYADM	2.43	0.00146364	0.015	1.83	7	7
5174	GLIS3	1.83	0.00146444	0.015	1.83	1	6
6550	ZNF438	1.34	0.00151682	0.015	1.82	2	4
22874	TNFRSF10D	2.07	0.00152139	0.015	1.82	1	2
80157	ASPHD1	1.91	0.00152946	0.015	1.82	2	1
51557	DND1	-2.87	0.00156008	0.016	1.81	1	1
84666	PFKFB3	2.68	0.00159552	0.016	1.8	2	2
5618	PLAT	1.76	0.00161177	0.016	1.8	1	4
389812	GPIHBP1	4.1	0.0016867	0.016	1.78	2	1
283375	GRIK4	3.32	0.00169119	0.017	1.78	2	10
84958	CREM	2.52	0.00169396	0.017	1.78	2	7
84647	LOXL2	2.63	0.0017092	0.017	1.78	5	1
4246	KRCC1	-1.56	0.00171132	0.017	1.78	1	1
7433	RBM47	-3.66	0.0017138	0.017	1.78	8	38
2920	CLEC18B	-3.28	0.00173624	0.017	1.77	1	1
1610	STON1-GTF2A1L	3.68	0.00184662	0.018	1.75	1	3
54848	VGLL3	2.69	0.00191655	0.018	1.74	1	1
51421	ACSM3	-2.44	0.00192853	0.018	1.74	1	5
3918	ZFAND2B	-1.62	0.00194462	0.018	1.74	1	1
7103	STK24	-1.37	0.00199317	0.019	1.73	1	3
91828	CCDC178	4.69	0.00200711	0.019	1.73	3	3
130	FSTL1	2.98	0.00200976	0.019	1.73	4	1
654463	MVP	-1.91	0.00202219	0.019	1.73	1	5
401024	APOBEC3D	-1.77	0.0020389	0.019	1.72	1	3
7125	PNPLA1	-2.62	0.00203938	0.019	1.72	5	5
79083	TMEM92	-4.21	0.00205923	0.019	1.72	2	3
931	TLR5	2.39	0.00207912	0.019	1.72	5	9
246181	NAT8L	3.96	0.00216889	0.02	1.7	4	4
54716	ALAS1	-1.25	0.00220355	0.02	1.7	1	4
2981	CLEC2D	-2.05	0.00225723	0.02	1.69	2	1
4051	PLCD1	-2.33	0.00226131	0.02	1.69	2	1
79977	TP53INP2	-1.8	0.00226352	0.02	1.69	1	2
140828	ROPN1	-4.61	0.00226729	0.02	1.69	1	2
10158	ZNF331	2.57	0.00235221	0.021	1.68	8	3
259173	CTNND1	-1.91	0.00237813	0.021	1.67	5	1
195814	PATJ	-2.01	0.00237976	0.021	1.67	1	3
9053	FAM160A2	-1.86	0.00238852	0.021	1.67	1	3
151295	KIAA1217	-1.94	0.00242778	0.022	1.67	11	21
51548	NAA60	-1.05	0.00244128	0.022	1.67	2	3
10551	SEMA6D	-2.4	0.00244371	0.022	1.66	7	12
64600	SPTBN5	-2.37	0.00245524	0.022	1.66	3	2
347853	FRYL	-1.79	0.00245537	0.022	1.66	2	6
1555	ZNF575	-2.18	0.00247695	0.022	1.66	1	1
2041	ADRB3	2.87	0.00248392	0.022	1.66	4	1
6689	LAX1	-2.7	0.00252472	0.022	1.65	2	6
340152	THY1	2.3	0.00253769	0.022	1.65	7	3
55612	C2CD2	1.54	0.00254263	0.022	1.65	1	1
55715	HEPACAM	3.14	0.00255487	0.022	1.65	2	2
957	ALDH1L1	2.54	0.00257842	0.022	1.65	1	2
1380	NYNRIN	1.68	0.00262425	0.023	1.64	3	3
94122	CCR7	-4.14	0.00263847	0.023	1.64	1	1
151354	PDE1B	2.28	0.00264693	0.023	1.64	8	1
164656	TFPI2	3.95	0.002652	0.023	1.64	1	2
56961	STAT3	1.08	0.00266396	0.023	1.64	1	2
7032	SMTNL2	2.35	0.00267272	0.023	1.64	2	1
9290	SGO1	-3.38	0.00276279	0.024	1.63	1	1
3909	TRIM54	-4.64	0.00277175	0.024	1.62	1	2
2980	LRRC10B	3.18	0.00281475	0.024	1.62	2	1
2672	TNFSF4	-1.73	0.00283876	0.024	1.62	5	3
6523	GCSAM	-4.15	0.00284035	0.024	1.62	1	4
6347	EHD4-AS1	-3.6	0.00284291	0.024	1.62	1	1
79814	ACKR2	-3.13	0.00285461	0.024	1.62	2	6
389602	GSC	5.16	0.00287032	0.024	1.61	1	2
91860	LRRN4CL	2.25	0.00287389	0.024	1.61	2	1
83451	TAT	-4.81	0.00293393	0.025	1.61	1	1
91464	GALNT13	3.53	0.00295198	0.025	1.6	9	2
54575	LRRC2	2.09	0.00295537	0.025	1.6	6	2
1040	MARK2	-1.45	0.00305548	0.026	1.59	2	7
5284	NKX2-2	-4.44	0.0030758	0.026	1.59	7	1
7851	TCF15	2.86	0.0031757	0.026	1.58	6	1
101929212	SPARC	2.52	0.00317583	0.026	1.58	9	3
7134	RHOH	-3.2	0.00321962	0.027	1.58	3	23
153769	CREB5	2.78	0.00322475	0.027	1.58	7	31
200010	CENPX	-1.65	0.00325886	0.027	1.57	1	2
54658	SYCE1	3	0.00331822	0.027	1.57	3	1
286262	KIF24	-1.48	0.00339392	0.028	1.56	1	1
27283	ATF3	1.28	0.00339797	0.028	1.56	1	1
3081	MEST	3.34	0.00344444	0.028	1.56	13	12
84612	LIMA1	-2.34	0.00345139	0.028	1.56	3	12
326624	KHDC1	1.42	0.00349249	0.028	1.55	1	1
6484	DSE	1.89	0.00349949	0.028	1.55	5	2
148808	ATP1A1	-2.13	0.00361471	0.029	1.54	1	3
79153	KLF7	1.88	0.00366688	0.029	1.54	3	1
638	FBLN5	2.72	0.00372528	0.029	1.53	2	2
6382	PKMYT1	-3.37	0.00376871	0.03	1.53	3	2
53405	PLCE1	-1.88	0.0037705	0.03	1.53	3	4
165904	BRICD5	-1.76	0.00382092	0.03	1.52	1	4
387849	LCK	-3.4	0.00382772	0.03	1.52	2	3
5169	MCEMP1	5.44	0.00389233	0.03	1.52	1	2
57648	PXDN	2.43	0.00389898	0.03	1.52	1	1
286676	GJA4	2.44	0.00398971	0.031	1.51	1	3
5774	TEP1	-1.68	0.004008	0.031	1.51	3	1
83661	PLD1	-2.44	0.00401972	0.031	1.51	3	14
8718	CYRIA	2.13	0.0040466	0.031	1.5	1	8
64063	FBLIM1	-1.44	0.00410389	0.032	1.5	2	10
838	ENPEP	3.05	0.00412037	0.032	1.5	4	1
1829	ERP27	-3.88	0.00414205	0.032	1.5	1	2
144100	CD44	2.1	0.00425359	0.033	1.49	2	1
7057	SOCS6	-1.68	0.00432946	0.033	1.48	1	2
54020	SMIM3	1.77	0.00434967	0.033	1.48	2	2
54738	EMP3	2.21	0.00435572	0.033	1.48	2	2
1415	DOC2A	-2.69	0.00439539	0.033	1.48	7	1
145376	COL12A1	2.47	0.00439822	0.033	1.48	5	3
251	CDK17	1.76	0.00440521	0.033	1.48	4	3
162387	ZNF518A	-1.4	0.00440672	0.033	1.48	1	4
55784	RAB27B	-2.53	0.00456854	0.034	1.47	1	2
149466	MPPE1	-1.44	0.00460356	0.034	1.46	1	1
84281	LINC01679	2.48	0.00464301	0.035	1.46	3	1
2838	CENPT	-1.73	0.00466979	0.035	1.46	1	1
79368	ZNF821	-1.85	0.00466428	0.035	1.46	1	3
90355	BCAR3	-1.62	0.0047132	0.035	1.46	3	8
402569	ATP2A1	-2.68	0.00485042	0.036	1.45	1	1
3294	CELA3B	-6.41	0.00487886	0.036	1.44	1	1
28	LDLRAP1	-1.66	0.00491588	0.036	1.44	2	2
153562	NPFF	-1.99	0.00503834	0.037	1.43	2	1
2444	GGT1	-2.77	0.00515541	0.038	1.43	5	2
79875	IL2RB	-2.73	0.00516068	0.038	1.43	2	4
54626	TMEM43	1.41	0.00520742	0.038	1.42	1	2
8714	FMO1	3.7	0.00527347	0.038	1.42	1	8
29974	GPD2	-1.88	0.00531903	0.038	1.42	5	3
130340	PLXNA4	2.82	0.00535238	0.038	1.42	1	1
653808	COL5A1	2.44	0.00537472	0.039	1.41	1	3
8796	GYPC	2.31	0.00539264	0.039	1.41	8	1
653437	PDE8A	-1.86	0.00550689	0.039	1.41	1	5
26998	LDLRAD3	2.2	0.00553757	0.039	1.4	5	11
84665	FADS6	-4.05	0.00557256	0.04	1.4	1	2
80714	SIAE	-2.54	0.00565679	0.04	1.4	1	2
55349	KCNJ12	1.88	0.00565822	0.04	1.4	4	10
5205	CNTNAP4	3.45	0.00567523	0.04	1.4	2	3
1417	PTGER3	2.59	0.00578777	0.041	1.39	2	5
260436	RUNX1	2.65	0.00579164	0.041	1.39	1	2
23382	CFLAR	-0.9	0.00586458	0.041	1.39	3	18
55200	CILP	3.61	0.00592145	0.041	1.38	4	3
26504	WDR3	1.52	0.00595805	0.042	1.38	1	1
81030	SLC17A9	-2.15	0.00597784	0.042	1.38	1	1
200958	XRCC3	-1.47	0.00602089	0.042	1.38	3	8
81932	NR4A2	2.33	0.00616782	0.043	1.37	2	2
389332	ID4	1.79	0.00620389	0.043	1.37	2	1
23474	TBC1D16	1.65	0.00621998	0.043	1.37	2	3
389084	DLGAP4	0.99	0.00622481	0.043	1.37	2	17
726	CD276	1.51	0.00631339	0.044	1.36	2	3
254887	ATF7	0.84	0.00636272	0.044	1.36	1	4
92565	GAS7	2.18	0.00657216	0.045	1.35	6	1
200634	NGFR	2.44	0.00658355	0.045	1.35	2	5
100996579	SPSB4	3.44	0.00660421	0.045	1.35	3	2
54566	ELOVL5	2.36	0.00662524	0.045	1.35	1	4
8045	INF2	-1.44	0.00664113	0.045	1.35	6	3
153768	TDRD5	-5.14	0.00674862	0.046	1.34	5	3
100316904	SLC41A2	-2.01	0.00689242	0.046	1.33	1	1
148418	VENTX	1.93	0.00695377	0.047	1.33	10	2
2938	FAM71E2	-5.94	0.00697297	0.047	1.33	2	2
26499	KCNE1	3.62	0.00699838	0.047	1.33	3	12
84451	FAR2	-1.59	0.00711184	0.047	1.32	1	5
100505839	RPS6KA2	1.75	0.00712813	0.047	1.32	1	1
79853	FAM102A	-1.82	0.00713422	0.047	1.32	1	5
29850	DNAH8	-5.44	0.00715808	0.048	1.32	3	2
126868	PALM2AKAP2	1.96	0.00719954	0.048	1.32	4	6
10913	NDN	1.14	0.0072179	0.048	1.32	2	1
729830	PLPPR4	1.83	0.00726023	0.048	1.32	6	2
2166	GALNT15	3.31	0.00727985	0.048	1.32	5	2
5208	RHBDF1	-1.27	0.00729946	0.048	1.32	1	2
10755	GPR183	2.34	0.00738958	0.049	1.31	5	1
57535	MRAS	2.36	0.00752855	0.049	1.31	2	5
90019	CHST5	-8.24	1.5e-27	2.48e-23	22.61	0	2
9235	INAVA	-7.5	1.54e-22	1.08e-18	17.97	0	9
80168	CLDN8	-9.46	2.86e-22	1.5e-18	17.82	0	4
374569	MUC3A	-6.67	5.19e-22	2.18e-18	17.66	0	2
441178	FAM83E	-7.48	1.17e-19	2.73e-16	15.56	0	7
339403	C11orf86	-9.4	1.8e-19	3.77e-16	15.42	0	1
2705	CAPN13	-9.45	2.63e-19	5.01e-16	15.3	0	4
729238	KRTAP13-2	-9.9	3.27e-19	5.72e-16	15.24	0	2
762	AMN	-6.12	5.99e-19	8.98e-16	15.05	0	2
973	CGN	-7.05	1.56e-18	2.05e-15	14.69	0	6
51066	ENTPD8	-7.57	1.84e-18	2.28e-15	14.64	0	3
640	CDHR2	-8.22	2.12e-18	2.47e-15	14.61	0	21
59272	CYP3A5	-6.59	2.27e-18	2.51e-15	14.6	0	1
171586	SCNN1A	-7.01	3.85e-18	4.04e-15	14.39	0	10
158584	EPS8L3	-8.04	1.3e-17	1.3e-14	13.89	0	8
1824	BAIAP2L2	-6.63	2.13e-17	2.04e-14	13.69	0	8
6674	B4GALNT3	-6.32	2.65e-17	2.36e-14	13.63	0	1
946	RHPN2	-6.41	3.55e-17	2.76e-14	13.56	0	1
256380	SLC17A4	-8.85	4.31e-17	3.23e-14	13.49	0	3
8612	PKP3	-7.03	4.56e-17	3.3e-14	13.48	0	10
8456	ARL14	-8.46	7.09e-17	4.96e-14	13.3	0	6
130576	HSH2D	-6.88	8.05e-17	5.28e-14	13.28	0	5
84440	CRYBG2	-8.05	1.12e-16	7.1e-14	13.15	0	8
5029	CDHR5	-7.71	1.28e-16	7.93e-14	13.1	0	8
51251	RASSF6	-6.3	1.34e-16	8.02e-14	13.1	0	13
147093	NGEF	-7.16	2.17e-16	1.23e-13	12.91	0	15
11254	TMIGD1	-8.17	2.53e-16	1.36e-13	12.87	0	3
7163	CRB3	-6.7	3.35e-16	1.72e-13	12.77	0	1
127845	PHGR1	-7.61	3.73e-16	1.86e-13	12.73	0	7
7033	LINC01559	-8.79	3.91e-16	1.91e-13	12.72	0	2
55143	MYO1A	-6.62	5.67e-16	2.64e-13	12.58	0	4
64081	MOGAT3	-7.82	8.53e-16	3.81e-13	12.42	0	7
54576	MUC2	-8.24	1.08e-15	4.73e-13	12.32	0	6
9170	CTSE	-8.91	1.23e-15	5.25e-13	12.28	0	4
221188	PRSS3	-6.91	1.26e-15	5.29e-13	12.28	0	4
445328	POF1B	-7.82	1.3e-15	5.36e-13	12.27	0	4
29785	GSDMB	-5.53	1.83e-15	7.4e-13	12.13	0	2
146456	SMIM31	-7.7	1.91e-15	7.57e-13	12.12	0	1
401546	PLS1	-7.34	2.38e-15	9.27e-13	12.03	0	12
196264	KRT15	-8.43	2.63e-15	1.01e-12	12	0	5
80022	HNF1A-AS1	-7.56	2.69e-15	1.01e-12	12	0	1
23764	USH1C	-5.98	2.94e-15	1.07e-12	11.97	0	1
646962	SLC9A2	-6.72	3.02e-15	1.07e-12	11.97	0	1
6048	HNF4G	-6.79	3.69e-15	1.28e-12	11.89	0	3
116071	PKIB	-6.97	3.72e-15	1.28e-12	11.89	0	6
84953	FAM83F	-6.88	5.51e-15	1.84e-12	11.74	0	3
1557	ELMO3	-6.68	6.29e-15	2.01e-12	11.7	0	3
50636	FUT2	-7.86	6.24e-15	2.01e-12	11.7	0	9
27293	COL17A1	-7.83	6.54e-15	2.02e-12	11.69	0	3
83998	XDH	-8.38	6.5e-15	2.02e-12	11.69	0	5
474	LINC02441	-7.98	6.73e-15	2.04e-12	11.69	0	1
7464	CHMP4C	-6.49	6.95e-15	2.05e-12	11.69	0	3
4293	TLDC2	-7.46	7.24e-15	2.08e-12	11.68	0	8
2696	IL22RA1	-7.8	7.95e-15	2.22e-12	11.65	0	1
6751	PLA2G4F	-7.99	8.68e-15	2.37e-12	11.63	0	3
79905	IRF6	-6.7	9.12e-15	2.46e-12	11.61	0	4
7535	ALPI	-7.38	1.48e-14	3.79e-12	11.42	0	4
118881	STX19	-7.27	1.53e-14	3.88e-12	11.41	0	7
92714	RAPGEFL1	-5.91	1.94e-14	4.86e-12	11.31	0	9
4837	CAMSAP3	-5.64	2.16e-14	5.34e-12	11.27	0	1
85315	TMC5	-7.34	3.4e-14	8.02e-12	11.1	0	10
5268	PDZD3	-8.27	3.88e-14	8.95e-12	11.05	0	3
6469	MISP	-6.98	4.01e-14	9.15e-12	11.04	0	7
1281	GPA33	-7.23	4.2e-14	9.48e-12	11.02	0	1
2833	NOX1	-6.61	4.87e-14	1.09e-11	10.96	0	2
4324	LGALS9C	-7.77	6.47e-14	1.39e-11	10.86	0	1
150135	CLDN3	-6.46	6.51e-14	1.39e-11	10.86	0	2
23094	PRR15	-6.86	9.41e-14	1.98e-11	10.7	0	2
100190949	CAPN8	-8.89	1.09e-13	2.24e-11	10.65	0	1
81618	PRAC1	-8.34	1.12e-13	2.27e-11	10.64	0	1
163747	SH2D3A	-6.83	1.12e-13	2.27e-11	10.64	0	5
100188954	KDF1	-7.24	1.21e-13	2.41e-11	10.62	0	5
23495	MST1R	-5.99	1.26e-13	2.5e-11	10.6	0	5
114041	AGR3	-8.07	1.31e-13	2.56e-11	10.59	0	1
1269	STYK1	-6.48	1.78e-13	3.43e-11	10.46	0	1
10451	HNF4A	-7.07	1.99e-13	3.73e-11	10.43	0	24
440193	LGALS4	-7.15	2.02e-13	3.75e-11	10.43	0	7
92736	KRT19	-7.29	2.4e-13	4.38e-11	10.36	0	5
7015	BCAS1	-7.31	2.5e-13	4.53e-11	10.34	0	10
149233	CREB3L3	-7.85	3.09e-13	5.51e-11	10.26	0	4
120406	NIPAL1	-6.41	3.16e-13	5.57e-11	10.25	0	1
1404	LLGL2	-6.21	4.25e-13	7.25e-11	10.14	0	5
5009	ST6GALNAC1	-6.25	4.22e-13	7.25e-11	10.14	0	8
92558	GCNT3	-7.1	4.75e-13	7.97e-11	10.1	0	8
79056	CDC42BPG	-6.92	5.53e-13	9.22e-11	10.04	0	2
7718	KLF5	-5.16	6e-13	9.91e-11	10	0	4
164118	TJP3	-6.93	6.35e-13	1.03e-10	9.99	0	14
10637	ADGRF4	-10.78	6.48e-13	1.05e-10	9.98	0	5
222546	MUC13	-7.17	6.73e-13	1.07e-10	9.97	0	7
27299	EHF	-6.79	6.94e-13	1.09e-10	9.96	0	22
8991	ACY3	-7.15	7.33e-13	1.15e-10	9.94	0	9
342897	TMEM184A	-6.81	7.42e-13	1.15e-10	9.94	0	7
283229	KRT8	-5.69	7.47e-13	1.15e-10	9.94	0	13
200403	C1orf116	-8.62	7.74e-13	1.19e-10	9.93	0	6
255101	SLC6A7	-7.73	9.05e-13	1.36e-10	9.87	0	4
85455	BTNL8	-6.8	9.26e-13	1.38e-10	9.86	0	5
55824	SGK2	-6.97	9.83e-13	1.45e-10	9.84	0	10
51087	BCL2L15	-6.82	1.04e-12	1.52e-10	9.82	0	7
9048	SMIM6	-7.8	1.1e-12	1.59e-10	9.8	0	4
6519	NXPE4	-7.25	1.3e-12	1.85e-10	9.73	0	5
29995	B3GNT3	-7.3	1.38e-12	1.95e-10	9.71	0	5
93010	CYP2J2	-5.3	1.49e-12	2.06e-10	9.69	0	1
645784	EFNA2	-7.23	1.59e-12	2.18e-10	9.66	0	2
57121	DQX1	-8.27	1.65e-12	2.25e-10	9.65	0	4
4975	HSD11B2	-6.14	1.73e-12	2.35e-10	9.63	0	2
51547	AKR1B10	-6.79	2.04e-12	2.71e-10	9.57	0	2
1843	TMEM125	-6.8	2.03e-12	2.71e-10	9.57	0	6
3110	SEMA4G	-5.55	2.71e-12	3.53e-10	9.45	0	4
8399	GDPD2	-8.52	2.82e-12	3.66e-10	9.44	0	1
25823	SLC30A10	-9.44	2.98e-12	3.83e-10	9.42	0	2
55262	EPN3	-6.88	3.22e-12	4.1e-10	9.39	0	7
85462	CAPN9	-7.48	3.39e-12	4.29e-10	9.37	0	7
8495	RAB17	-6.31	3.51e-12	4.42e-10	9.36	0	8
2813	RNF186	-6.7	3.66e-12	4.53e-10	9.34	0	9
55512	BNIP5	-7.63	3.65e-12	4.53e-10	9.34	0	12
11240	CDH1	-6.4	4.23e-12	5.13e-10	9.29	0	2
29775	SMIM22	-6.87	4.49e-12	5.42e-10	9.27	0	7
55540	EXPH5	-6.91	5.74e-12	6.85e-10	9.16	0	6
83953	CYP3A4	-8.22	6.82e-12	7.96e-10	9.1	0	1
89958	CKMT1B	-6.48	7.19e-12	8.34e-10	9.08	0	1
8811	SLC26A3	-7.58	7.87e-12	9.07e-10	9.04	0	2
353500	SLC28A2	-7.93	9.15e-12	1.03e-09	8.99	0	1
55890	VILL	-4.39	9.44e-12	1.06e-09	8.97	0	5
102723344	C19orf33	-7.09	9.89e-12	1.1e-09	8.96	0	2
1556	INSL5	-9.2	1e-11	1.11e-09	8.95	0	3
159963	FXYD3	-6.76	1.04e-11	1.14e-09	8.94	0	11
84239	CXADR	-5.26	1.16e-11	1.27e-09	8.9	0	2
10644	TMEM82	-6.39	1.17e-11	1.27e-09	8.9	0	1
646627	CDH17	-6.78	1.18e-11	1.27e-09	8.89	0	6
93082	LRRC31	-6.52	1.22e-11	1.3e-09	8.89	0	6
132299	STAP2	-5.88	1.22e-11	1.3e-09	8.89	0	8
5624	GPRIN2	-5.52	1.25e-11	1.32e-09	8.88	0	8
79019	AQP8	-8.46	1.28e-11	1.34e-09	8.87	0	5
3569	RASAL1	-7.36	1.31e-11	1.36e-09	8.87	0	6
101928891	ELF3	-6.71	1.41e-11	1.45e-09	8.84	0	10
55670	CLDN4	-6.72	1.42e-11	1.45e-09	8.84	0	10
115399	FA2H	-5.56	1.49e-11	1.5e-09	8.82	0	2
266675	CLDN7	-6.52	1.5e-11	1.51e-09	8.82	0	6
134549	SFN	-7.52	1.62e-11	1.61e-09	8.79	0	11
118932	GLOD5	-7.68	1.69e-11	1.68e-09	8.77	0	1
5450	GDA	-6.22	1.75e-11	1.73e-09	8.76	0	3
54621	NXPE1	-6.95	1.76e-11	1.73e-09	8.76	0	6
6578	CLRN3	-7.14	1.77e-11	1.73e-09	8.76	0	4
1830	SULT1B1	-7.09	1.81e-11	1.76e-09	8.76	0	5
81793	SATB2-AS1	-7.97	2.2e-11	2.11e-09	8.68	0	5
100820709	PNLIPRP2	-8.03	2.32e-11	2.21e-09	8.65	0	4
57458	IGSF9	-6.63	2.34e-11	2.23e-09	8.65	0	1
5030	GGT6	-6.85	2.41e-11	2.28e-09	8.64	0	10
930	SPINK5	-7.76	2.42e-11	2.28e-09	8.64	0	2
3914	C15orf48	-6.94	2.51e-11	2.34e-09	8.63	0	3
79919	TRPM6	-7.71	2.59e-11	2.4e-09	8.62	0	2
375449	MEP1A	-6.95	2.69e-11	2.48e-09	8.61	0	8
8906	CES3	-6.79	2.94e-11	2.68e-09	8.57	0	6
80320	MS4A12	-7.55	3.01e-11	2.72e-09	8.57	0	2
2128	LRRC66	-5.46	3.04e-11	2.74e-09	8.56	0	2
978	FUT6	-6.61	3.22e-11	2.88e-09	8.54	0	11
8744	VIL1	-6.66	3.34e-11	2.97e-09	8.53	0	10
5590	FUT3	-6.73	3.46e-11	3.06e-09	8.51	0	9
80772	PLAAT2	-8.08	3.54e-11	3.12e-09	8.51	0	6
7984	EPCAM	-6.93	3.58e-11	3.14e-09	8.5	0	2
9148	ANKRD40CL	-7.36	3.91e-11	3.4e-09	8.47	0	5
197257	GUCY2C	-6.78	3.96e-11	3.44e-09	8.46	0	3
135932	BTNL3	-7.2	4.35e-11	3.76e-09	8.42	0	3
7368	CBLC	-6.57	4.44e-11	3.82e-09	8.42	0	4
55630	S100A14	-6.86	5.64e-11	4.77e-09	8.32	0	3
2582	PITX1	-4.94	6.02e-11	5.06e-09	8.3	0	8
101927901	ITLN1	-8.68	7.7e-11	6.36e-09	8.2	0	4
100996485	KRT18	-6.63	7.73e-11	6.37e-09	8.2	0	4
114881	PTPRH	-5.22	8.47e-11	6.94e-09	8.16	0	3
221262	NOXO1	-5.9	9.16e-11	7.43e-09	8.13	0	7
400935	SGPP2	-5.22	9.65e-11	7.76e-09	8.11	0	4
3670	CCNI2	-6.12	9.89e-11	7.92e-09	8.1	0	3
199964	SLC16A9	-6.4	1.05e-10	8.35e-09	8.08	0	3
83699	ESRP2	-6.89	1.06e-10	8.46e-09	8.07	0	3
7421	SLC22A18AS	-6.08	1.07e-10	8.51e-09	8.07	0	5
127579	HNF1A	-4.4	1.17e-10	9.19e-09	8.04	0	8
1057	GPX2	-6.81	1.45e-10	1.13e-08	7.95	0	9
6717	EPS8L2	-5.04	1.6e-10	1.23e-08	7.91	0	4
23616	CCDC68	-5.28	1.76e-10	1.35e-08	7.87	0	7
90990	ABCB1	-5.35	1.81e-10	1.37e-08	7.86	0	2
127534	SOWAHB	-6.74	1.93e-10	1.45e-08	7.84	0	4
9159	LRRC19	-6.91	2.02e-10	1.52e-08	7.82	0	1
9963	TRPV3	-5.56	2.05e-10	1.54e-08	7.81	0	6
158830	BCAR3-AS1	-5.85	2.15e-10	1.6e-08	7.79	0	2
85414	CFTR	-6.98	2.25e-10	1.67e-08	7.78	0	1
2188	LGALS2	-6.03	2.73e-10	1.99e-08	7.7	0	6
91351	PRSS8	-6.41	2.87e-10	2.08e-08	7.68	0	9
123099	RAB19	-7.17	2.97e-10	2.15e-08	7.67	0	5
344887	GAU1	-6.56	3.38e-10	2.41e-08	7.62	0	1
342510	F2RL1	-6.69	3.39e-10	2.41e-08	7.62	0	1
91050	ANKS4B	-6.56	3.4e-10	2.41e-08	7.62	0	5
79733	CKMT1A	-6.6	3.46e-10	2.44e-08	7.61	0	1
85450	LINC01752	-6.7	3.54e-10	2.49e-08	7.6	0	1
354	FAM3D	-6.69	3.6e-10	2.52e-08	7.6	0	8
2875	GALNT3	-5.27	3.91e-10	2.71e-08	7.57	0	8
6648	SPINT2	-5	3.96e-10	2.74e-08	7.56	0	5
64761	IL17RE	-4.31	4.23e-10	2.9e-08	7.54	0	7
7079	HMGCS2	-6.04	4.65e-10	3.18e-08	7.5	0	5
5026	HOXB9	-5.97	4.72e-10	3.2e-08	7.49	0	1
5948	TRIM31	-7.97	5.08e-10	3.43e-08	7.47	0	2
145447	BCL2L14	-6.82	5.36e-10	3.61e-08	7.44	0	9
255488	SLC51B	-6.4	5.49e-10	3.68e-08	7.43	0	6
6570	MARVELD3	-6.99	5.62e-10	3.76e-08	7.43	0	1
284723	BSPRY	-4.68	5.81e-10	3.87e-08	7.41	0	3
347741	IHH	-6.31	5.84e-10	3.88e-08	7.41	0	1
5054	CLCA4	-6.69	6.12e-10	4.04e-08	7.39	0	1
24147	CD24	-5.33	6.21e-10	4.08e-08	7.39	0	1
57699	S100P	-8.08	7.26e-10	4.74e-08	7.32	0	1
50943	TTC39A	-5.06	7.3e-10	4.74e-08	7.32	0	4
3848	TMEM30B	-5.82	7.56e-10	4.9e-08	7.31	0	8
4760	FABP1	-7.04	8.24e-10	5.29e-08	7.28	0	4
4058	TEX11	-7.53	8.84e-10	5.62e-08	7.25	0	2
23443	TUBAL3	-7.09	1.09e-09	6.8e-08	7.17	0	1
101927969	ITGB6	-7.28	1.19e-09	7.34e-08	7.13	0	2
113230	HNF1B	-6.25	1.31e-09	8.04e-08	7.09	0	6
54463	RNF43	-5.22	1.64e-09	9.87e-08	7.01	0	11
757	OCLN	-5.11	1.68e-09	1.01e-07	7	0	3
146223	SLC26A2	-5.66	1.76e-09	1.04e-07	6.98	0	1
6515	CEACAM5	-6.89	1.84e-09	1.08e-07	6.97	0	5
117581	HAVCR1	-7.69	1.95e-09	1.15e-07	6.94	0	6
1280	NAT2	-7.1	2.02e-09	1.19e-07	6.93	0	4
57482	CDHR1	-5.95	2.06e-09	1.21e-07	6.92	0	3
124220	ABHD11-AS1	-6.3	2.12e-09	1.23e-07	6.91	0	1
622	GPR39	-5.13	2.21e-09	1.28e-07	6.89	0	4
222643	JUP	-4.19	2.47e-09	1.43e-07	6.84	0	14
29802	ADGRG7	-7.48	2.57e-09	1.48e-07	6.83	0	8
94039	PRRG2	-5.24	2.59e-09	1.49e-07	6.83	0	2
168455	RAB25	-6.11	2.66e-09	1.52e-07	6.82	0	5
8780	FRMD1	-7.34	2.83e-09	1.62e-07	6.79	0	7
27290	CDX1	-6.11	2.85e-09	1.62e-07	6.79	0	8
84433	C10orf99	-6.65	2.88e-09	1.63e-07	6.79	0	7
10537	IYD	-6.83	3.35e-09	1.89e-07	6.72	0	4
417	CYP2C18	-5.85	3.94e-09	2.21e-07	6.66	0	1
9912	PRR15L	-6.32	4.04e-09	2.25e-07	6.65	0	10
101928022	TMPRSS4	-6.45	4.41e-09	2.44e-07	6.61	0	7
2252	CNKSR1	-4.96	4.46e-09	2.46e-07	6.61	0	7
6822	RHBDL2	-5.9	4.91e-09	2.68e-07	6.57	0	5
2796	FABP2	-7.32	4.98e-09	2.72e-07	6.57	0	4
80307	PLEKHS1	-5.96	5.11e-09	2.77e-07	6.56	0	8
10866	SPDEF	-6.52	5.14e-09	2.78e-07	6.56	0	7
9840	ABCC13	-7.37	5.25e-09	2.83e-07	6.55	0	4
55554	SPINT1	-5.81	5.53e-09	2.96e-07	6.53	0	4
192134	FGFBP1	-7.56	6.13e-09	3.25e-07	6.49	0	6
57171	MKRN2OS	-6.26	6.76e-09	3.56e-07	6.45	0	3
54805	C4orf19	-5.87	6.86e-09	3.6e-07	6.44	0	10
440107	AXDND1	-6.68	6.97e-09	3.64e-07	6.44	0	2
5697	KLK1	-6.19	7.2e-09	3.75e-07	6.43	0	4
4856	ADTRP	-6.32	7.31e-09	3.8e-07	6.42	0	3
100130872	PPP1R14D	-6.22	7.36e-09	3.82e-07	6.42	0	4
80336	UGT2B7	-8.93	7.49e-09	3.87e-07	6.41	0	2
120071	PROM1	-4.81	7.86e-09	4.01e-07	6.4	0	1
1944	AIFM3	-5.41	8.24e-09	4.18e-07	6.38	0	13
6899	SATB2	-4.66	8.49e-09	4.27e-07	6.37	0	6
57475	GALNT5	-5.89	9.15e-09	4.6e-07	6.34	0	1
339	SERINC2	-6.01	9.18e-09	4.6e-07	6.34	0	2
79729	CEACAM1	-6.2	9.32e-09	4.66e-07	6.33	0	1
9429	PDZK1	-8.37	1e-08	4.98e-07	6.3	0	5
100216001	RETNLB	-9.59	1.34e-08	6.55e-07	6.18	0	6
56990	LCN15	-8.22	1.57e-08	7.64e-07	6.12	0	6
101928994	SLC39A5	-5.59	1.66e-08	8e-07	6.1	0	4
51809	SYTL1	-5.1	1.78e-08	8.51e-07	6.07	0	8
89870	PLA2G12B	-7.88	1.82e-08	8.68e-07	6.06	0	4
84951	SCGB2A1	-7.78	1.86e-08	8.81e-07	6.05	0	3
440348	VIPR1	-6	1.97e-08	9.31e-07	6.03	0	8
11178	DAO	-8.55	2.07e-08	9.74e-07	6.01	0	1
54847	LAMC2	-4.52	2.22e-08	1.04e-06	5.98	0	5
112724	TSPAN8	-5.97	2.24e-08	1.04e-06	5.98	0	4
26027	ADH6	-4.81	2.32e-08	1.08e-06	5.97	0	4
5603	TNNC2	-4.52	2.6e-08	1.19e-06	5.92	0	1
4327	GUCA2B	-5.95	3.11e-08	1.4e-06	5.85	0	9
5972	CYP4F3	-5.99	3.28e-08	1.47e-06	5.83	0	3
2641	GRHL2	-6.02	3.31e-08	1.49e-06	5.83	0	10
89790	PDZK1IP1	-5.03	3.52e-08	1.57e-06	5.8	0	2
79817	ALS2CL	-4.56	3.76e-08	1.67e-06	5.78	0	3
10809	SDR16C5	-5.16	3.76e-08	1.67e-06	5.78	0	6
7172	SIRT6	-3.65	4.06e-08	1.78e-06	5.75	0	3
7644	AGR2	-6.48	4.13e-08	1.81e-06	5.74	0	8
2101	PLA2G2F	-8.14	4.25e-08	1.86e-06	5.73	0	1
162979	TBX10	-5.95	4.43e-08	1.92e-06	5.72	0	1
84159	CYP2B6	-6.38	4.43e-08	1.92e-06	5.72	0	2
3827	SPIB	-6.02	4.61e-08	1.99e-06	5.7	0	3
3589	FERMT1	-5.13	4.74e-08	2.04e-06	5.69	0	5
116842	DOK4	-3.96	4.84e-08	2.07e-06	5.68	0	4
5990	ENTPD5	-4.29	4.91e-08	2.1e-06	5.68	0	2
9971	CR2	-8.15	5.13e-08	2.19e-06	5.66	0	2
84971	SYTL5	-4.36	5.28e-08	2.24e-06	5.65	0	1
7264	SHD	-6.09	6.38e-08	2.67e-06	5.57	0	1
55521	TFF2	-9.56	6.58e-08	2.73e-06	5.56	0	3
10276	LAMA3	-4.21	7.14e-08	2.94e-06	5.53	0	10
55198	GUCA2A	-6.38	7.45e-08	3.06e-06	5.51	0	8
3090	GFI1	-4.33	7.56e-08	3.09e-06	5.51	0	11
5655	AGMAT	-4.66	7.76e-08	3.16e-06	5.5	0	2
348654	LOC389602	-7.68	7.8e-08	3.17e-06	5.5	0	1
57569	ABHD11	-3.48	8.1e-08	3.27e-06	5.49	0	1
9476	ISX	-5.39	8.53e-08	3.43e-06	5.46	0	1
3958	UGT1A10	-6.64	8.76e-08	3.52e-06	5.45	0	7
22854	CDS1	-5.69	8.83e-08	3.54e-06	5.45	0	3
4485	PIGR	-5.77	8.88e-08	3.55e-06	5.45	0	9
84766	SMIM2-AS1	-5.2	8.98e-08	3.57e-06	5.45	0	1
4803	TNNC1	-6.24	8.98e-08	3.57e-06	5.45	0	3
403313	SH3RF2	-5.07	9.15e-08	3.63e-06	5.44	0	6
79616	SLC5A9	-6.05	9.37e-08	3.7e-06	5.43	0	1
5582	UGT1A1	-9.27	1.01e-07	3.98e-06	5.4	0	1
23169	TPRN	-3.75	1.03e-07	4.06e-06	5.39	0	2
3231	TINAG	-6.53	1.09e-07	4.25e-06	5.37	0	4
79946	HGD	-6.23	1.11e-07	4.31e-06	5.37	0	3
27111	PARD6B	-4.1	1.11e-07	4.32e-06	5.36	0	1
388512	MFSD4A	-4.57	1.24e-07	4.77e-06	5.32	0	1
79669	GDPD3	-4.87	1.28e-07	4.91e-06	5.31	0	5
8784	SDC1	-4.86	1.38e-07	5.24e-06	5.28	0	2
401934	CLIC5	-4.9	1.4e-07	5.32e-06	5.27	0	3
1609	REP15	-5.23	1.54e-07	5.77e-06	5.24	0	3
3383	ENPP3	-4.48	1.55e-07	5.77e-06	5.24	0	4
440590	KIAA1522	-3.99	1.59e-07	5.9e-06	5.23	0	4
1179	MS4A8	-7.13	1.63e-07	6.04e-06	5.22	0	4
8445	CASP5	-5.89	1.69e-07	6.24e-06	5.21	0	1
51339	DSG2	-5.15	1.93e-07	7.04e-06	5.15	0	1
3669	CRYBB2	-6.34	2.13e-07	7.69e-06	5.11	0	1
81792	PPP1R36	-3.27	2.14e-07	7.71e-06	5.11	0	4
3512	ALPG	-8.46	2.16e-07	7.79e-06	5.11	0	1
1277	C1orf210	-6.52	2.36e-07	8.44e-06	5.07	0	8
1119	GPR15	-5.34	2.42e-07	8.64e-06	5.06	0	1
51280	FCRL2	-8.83	2.5e-07	8.87e-06	5.05	0	1
387882	MACIR	-3.9	2.54e-07	8.99e-06	5.05	0	3
148304	KPNA7	-8.84	2.57e-07	9.11e-06	5.04	0	1
9881	HSD17B2	-6.24	2.64e-07	9.31e-06	5.03	0	9
5097	MARVELD2	-5.37	2.87e-07	1e-05	5	0	5
4783	FRK	-4.92	2.87e-07	1e-05	5	0	7
53354	HES2	-5.08	3.07e-07	1.06e-05	4.97	0	2
64090	ABCC3	-5.83	3.16e-07	1.09e-05	4.96	0	3
9842	A1CF	-6.69	3.18e-07	1.1e-05	4.96	0	4
840	AP1S3	-4.4	3.21e-07	1.1e-05	4.96	0	1
2904	ZG16	-7.29	3.21e-07	1.1e-05	4.96	0	2
2185	AQP12B	-8.85	3.3e-07	1.13e-05	4.95	0	3
25849	MYPN	-5.59	3.38e-07	1.15e-05	4.94	0	1
284023	PBX4	-3.29	3.41e-07	1.16e-05	4.94	0	7
5801	CHDH	-4.51	3.86e-07	1.3e-05	4.89	0	7
7562	CRYBB3	-5.92	4.1e-07	1.38e-05	4.86	0	2
282997	FDCSP	-8.3	4.13e-07	1.38e-05	4.86	0	1
66002	AHCYL2	-3.79	4.2e-07	1.4e-05	4.85	0	2
8877	PLEKHG6	-5.13	4.2e-07	1.4e-05	4.85	0	13
148479	CNNM4	-4.29	4.22e-07	1.4e-05	4.85	0	6
84960	ZBP1	-4.89	4.23e-07	1.41e-05	4.85	0	6
10811	HDHD3	-3.61	4.39e-07	1.45e-05	4.84	0	1
5318	SMIM32	-5.03	4.45e-07	1.47e-05	4.83	0	2
553103	ETHE1	-3.83	4.5e-07	1.48e-05	4.83	0	1
55762	SNORC	-4.74	4.59e-07	1.51e-05	4.82	0	3
51471	ZDHHC23	-4.4	4.72e-07	1.55e-05	4.81	0	1
11033	KRTCAP3	-5.19	4.8e-07	1.57e-05	4.8	0	2
11181	LINC01806	-7.58	4.87e-07	1.59e-05	4.8	0	1
51352	PRELID2	-3.67	5.42e-07	1.75e-05	4.76	0	2
23607	SAMD13	-3.77	5.61e-07	1.8e-05	4.74	0	7
57501	GSTA1	-7.28	5.68e-07	1.82e-05	4.74	0	1
55552	MAP3K21	-3.98	6e-07	1.91e-05	4.72	0	4
8638	SH3PXD2A-AS1	-7.37	6.15e-07	1.95e-05	4.71	0	1
8395	TM4SF20	-5.56	6.29e-07	1.99e-05	4.7	0	2
56704	TRPM5	-6.71	6.36e-07	2.01e-05	4.7	0	18
114793	MAB21L3	-8.44	6.42e-07	2.02e-05	4.69	0	4
4843	EDAR	-7.3	6.75e-07	2.12e-05	4.67	0	13
153328	PFKFB2	-3.24	7.54e-07	2.34e-05	4.63	0	5
100616259	GIPC1	-2.95	7.79e-07	2.41e-05	4.62	0	2
6690	ELAPOR1	-3.78	7.9e-07	2.44e-05	4.61	0	6
4646	SYT8	-7.5	7.91e-07	2.44e-05	4.61	0	10
54101	IL32	-4.08	8.31e-07	2.56e-05	4.59	0	10
101927722	MOGAT2	-6.29	8.4e-07	2.58e-05	4.59	0	6
1785	LINC02487	-8.55	8.72e-07	2.68e-05	4.57	0	1
10135	RXFP4	-8.13	8.86e-07	2.71e-05	4.57	0	5
64651	GJB1	-5.36	8.91e-07	2.72e-05	4.57	0	2
9180	SFTPA2	-6.01	9.36e-07	2.86e-05	4.54	0	3
766	CD79A	-6.3	9.88e-07	3e-05	4.52	0	1
10410	ACE2	-4.94	1.04e-06	3.14e-05	4.5	0	2
161247	FAAH2	-3.87	1.09e-06	3.29e-05	4.48	0	2
4500	SPAG1	-3.09	1.15e-06	3.44e-05	4.46	0	4
54831	PLPP2	-4.2	1.18e-06	3.51e-05	4.46	0	1
58512	FOXN1	-7.99	1.19e-06	3.53e-05	4.45	0	1
51296	P2RY2	-5.08	1.28e-06	3.8e-05	4.42	0	5
25994	LINC00974	-6.19	1.32e-06	3.9e-05	4.41	0	2
8836	SLC6A14	-7.22	1.4e-06	4.12e-05	4.39	0	4
84842	TFF3	-5.54	1.45e-06	4.24e-05	4.37	0	13
1606	CDCA8	-3.83	1.47e-06	4.29e-05	4.37	0	1
10721	UGT1A8	-7.36	1.5e-06	4.36e-05	4.36	0	3
286256	LPAR2	-3.92	1.56e-06	4.52e-05	4.35	0	5
10017	ADGRG5	-4.81	1.56e-06	4.54e-05	4.34	0	1
23046	ARHGEF35	-4.96	1.59e-06	4.6e-05	4.34	0	1
112399	TMED6	-5.92	1.7e-06	4.88e-05	4.31	0	6
116449	C9orf152	-5.32	1.75e-06	5.02e-05	4.3	0	9
101929623	MPZL3	-4.95	1.8e-06	5.16e-05	4.29	0	6
2300	HRCT1	-4.24	1.94e-06	5.52e-05	4.26	0	1
26290	BATF2	-2.03	1.99e-06	5.65e-05	4.25	0	1
6004	CYP2C19	-7.74	2.04e-06	5.76e-05	4.24	0	2
400866	ANO7	-5.69	2.05e-06	5.8e-05	4.24	0	7
9134	REG4	-7.32	2.16e-06	6.08e-05	4.22	0	4
401081	ATOH1	-5.81	2.17e-06	6.11e-05	4.21	0	1
353174	CORO2A	-3.97	2.27e-06	6.36e-05	4.2	0	5
81035	GIPR	-6.44	2.36e-06	6.59e-05	4.18	0	2
1285	TMC7	-3.77	2.49e-06	6.93e-05	4.16	0	4
10903	COMTD1	-3.62	2.61e-06	7.23e-05	4.14	0	1
81575	ARRDC1	-3.04	2.84e-06	7.83e-05	4.11	0	1
283710	SERPINB5	-6.23	3.05e-06	8.36e-05	4.08	0	8
8357	CXCR3	-4.47	3.15e-06	8.58e-05	4.07	0	2
148534	MMP15	-2.84	3.26e-06	8.83e-05	4.05	0	1
9744	LINC00479	-8.26	3.28e-06	8.87e-05	4.05	0	4
5743	C5orf52	-5.91	3.4e-06	9.19e-05	4.04	0	1
23604	DNMBP-AS1	-5.51	3.52e-06	9.44e-05	4.02	0	2
27158	TNFRSF13B	-6.48	3.56e-06	9.55e-05	4.02	0	4
59307	CCDC88C	-3.93	4.03e-06	0.000107	3.97	0	2
994	IL23R	-6.23	4.21e-06	0.00011	3.96	0	2
84166	NXPE2	-4.62	4.28e-06	0.000112	3.95	0	6
6820	OTC	-4.63	4.36e-06	0.000114	3.94	0	4
11001	PRRG4	-2.82	4.77e-06	0.000123	3.91	0	1
55111	ZNF165	-4.49	4.82e-06	0.000124	3.91	0	1
162417	TTC24	-7.23	4.82e-06	0.000124	3.91	0	1
93210	LEFTY1	-4.76	4.88e-06	0.000126	3.9	0	6
5106	ADAMDEC1	-5.44	4.96e-06	0.000127	3.9	0	2
57471	SELENBP1	-3.19	5e-06	0.000128	3.89	0	4
283748	CRACR2B	-4.24	5.09e-06	0.00013	3.89	0	3
101927851	CFAP65	-7.69	5.3e-06	0.000135	3.87	0	1
4084	DISP2	-4.16	5.35e-06	0.000136	3.87	0	2
10630	SLC3A1	-6.26	5.59e-06	0.000141	3.85	0	4
9121	B3GNT7	-4.06	5.75e-06	0.000145	3.84	0	5
7294	OMP	-7.41	6e-06	0.00015	3.82	0	4
30834	SIRT7	-3.25	6.01e-06	0.00015	3.82	0	1
124404	PLA2G10	-7.86	6.07e-06	0.000151	3.82	0	1
102724097	TPSG1	-5.2	6.19e-06	0.000154	3.81	0	5
171392	MAP11	-2.78	6.2e-06	0.000154	3.81	0	1
401258	FHDC1	-3.78	6.3e-06	0.000156	3.81	0	2
283208	PPFIBP2	-3.23	6.51e-06	0.000161	3.79	0	13
83990	GP2	-6.52	6.59e-06	0.000163	3.79	0	2
3835	PADI2	-5.27	7.1e-06	0.000174	3.76	0	4
54762	IL17RB	-4.1	7.14e-06	0.000174	3.76	0	2
404203	FCAMR	-6.49	7.15e-06	0.000174	3.76	0	2
55911	SAPCD2	-4.95	7.67e-06	0.000186	3.73	0	1
85477	BMP8A	-3.89	7.97e-06	0.000192	3.72	0	3
2921	GPRC5C	-3.1	8.2e-06	0.000197	3.71	0	4
145837	LINC02568	-6.41	8.31e-06	0.000199	3.7	0	2
80223	CYP2B7P	-4.8	8.61e-06	0.000206	3.69	0	3
101927412	ATP13A4	-4.79	8.86e-06	0.000211	3.68	0	7
319089	NEURL3	-7.53	8.99e-06	0.000213	3.67	0	2
126969	CENPM	-4.13	9.45e-06	0.000223	3.65	0	2
113278	LINC01637	-3.76	9.94e-06	0.000233	3.63	0	2
2327	PEX26	-3.27	1e-05	0.000234	3.63	0	2
3357	LRRC56	-3.28	1.01e-05	0.000235	3.63	0	7
253012	BEST4	-5.35	1.02e-05	0.000238	3.62	0	1
147798	ANKRD22	-5.39	1.05e-05	0.000245	3.61	0	8
206358	VSIG10	-3.03	1.07e-05	0.000249	3.6	0	1
150696	SLCO2A1	-3.59	1.08e-05	0.000251	3.6	0	1
2317	DSG3	-6	1.12e-05	0.000258	3.59	0	4
161835	TLR10	-6.78	1.13e-05	0.000261	3.58	0	1
79703	LINC00501	-8.07	1.17e-05	0.000269	3.57	0	2
7058	TMCC3	-3.13	1.23e-05	0.000281	3.55	0	4
10803	P2RY4	-4.95	1.24e-05	0.000284	3.55	0	1
23302	CD19	-5.75	1.28e-05	0.000292	3.53	0	1
80736	LAMB3	-4.9	1.29e-05	0.000292	3.53	0	9
644168	MAB21L4	-5.87	1.31e-05	0.000296	3.53	0	9
340075	AP1G2	-3.41	1.34e-05	0.000303	3.52	0	3
479	TNFSF9	4.3	1.38e-05	0.000308	3.51	0	1
643	CPTP	-2.22	1.39e-05	0.000311	3.51	0	2
7538	ARHGEF5	-2.65	1.44e-05	0.00032	3.49	0	2
1009	UGT8	-4.78	1.49e-05	0.000331	3.48	0	10
54830	SLC39A4	-2.94	1.53e-05	0.000338	3.47	0	15
3699	GALE	-3.73	1.55e-05	0.000343	3.46	0	4
871	LINC02421	-9.45	1.59e-05	0.00035	3.46	0	1
54532	OSBPL7	-3.48	1.66e-05	0.000364	3.44	0	2
26279	CCDC162P	-5.46	1.68e-05	0.000367	3.44	0	4
1506	IL17REL	-4.89	1.69e-05	0.000368	3.43	0	6
554210	TMEM61	-3.79	1.71e-05	0.000372	3.43	0	3
84929	VDR	-4.78	1.75e-05	0.000381	3.42	0	7
5608	DCST2	-3.73	1.76e-05	0.000382	3.42	0	1
6548	CELP	-5.6	1.8e-05	0.000391	3.41	0	1
8913	SRI	-3.16	1.85e-05	0.000399	3.4	0	2
254099	SH3BP1	-3.51	1.87e-05	0.000403	3.39	0	4
199786	GJB4	-8.81	1.91e-05	0.00041	3.39	0	5
57228	SLC23A1	-6.16	1.94e-05	0.000417	3.38	0	1
9447	SLC45A3	-4.21	1.96e-05	0.000421	3.38	0	8
54084	FANCF	-1.64	1.97e-05	0.000421	3.38	0	1
481	DDX60L	-2.06	1.97e-05	0.000421	3.38	0	1
10005	DEGS2	-3.75	1.97e-05	0.000421	3.38	0	2
6926	NMRAL2P	-6.25	1.98e-05	0.000422	3.37	0	1
54551	E2F8	-4.89	2.11e-05	0.000448	3.35	0	1
57224	GPT	-4.32	2.3e-05	0.000484	3.31	0	20
146909	SOD2	2.69	2.34e-05	0.000491	3.31	0	1
83879	PARP12	-2.6	2.34e-05	0.000491	3.31	0	2
284233	TIMP4	4.46	2.37e-05	0.000496	3.3	0	3
11130	P2RX5	-4.91	2.38e-05	0.000497	3.3	0	1
2865	RBP2	-4.72	2.4e-05	0.000501	3.3	0	7
9957	SLC25A34	-2.69	2.44e-05	0.000507	3.3	0	9
134147	SERPINE1	5.4	2.5e-05	0.000518	3.29	0	1
55076	FJX1	4.31	2.5e-05	0.000518	3.29	0	1
80342	CPNE5	-3.09	2.52e-05	0.000521	3.28	0	1
83697	FOXP3	-3.95	2.55e-05	0.000526	3.28	0	2
342035	LTK	-4.38	2.63e-05	0.000541	3.27	0	2
6610	SLC35A3	-2.87	2.63e-05	0.000541	3.27	0	7
201501	MISP3	-3.17	2.69e-05	0.000551	3.26	0	2
90550	TMEM50B	-3.12	2.71e-05	0.000555	3.26	0	1
2635	CMTM4	-2.67	2.77e-05	0.000566	3.25	0	4
115650	CRACD	-3.4	2.92e-05	0.000595	3.23	0	11
7380	ZG16B	-4.9	2.95e-05	0.000599	3.22	0	2
51703	UNC5CL	-2.68	3e-05	0.000606	3.22	0	4
270	VPREB3	-5.93	3e-05	0.000606	3.22	0	2
255057	CCDC71L	3.53	3.09e-05	0.000622	3.21	0	1
23657	RIOK3	-2.74	3.13e-05	0.000628	3.2	0	3
64780	SPINK4	-5.82	3.25e-05	0.000652	3.19	0	1
27074	UBD	-7.18	3.37e-05	0.000673	3.17	0	3
219670	ART1	-8.5	3.38e-05	0.000674	3.17	0	4
10620	ARHGAP44	-2.32	3.42e-05	0.000682	3.17	0	2
201161	LINC01214	-6.53	3.44e-05	0.000684	3.16	0	1
3386	SULT2A1	-7.53	3.59e-05	0.00071	3.15	0	7
9480	GNRH1	-3.59	3.61e-05	0.000713	3.15	0	2
6280	FER1L4	-3.04	3.62e-05	0.000714	3.15	0	1
128239	HCP5	-7.67	3.62e-05	0.000714	3.15	0	5
55902	B3GNT6	-5.58	3.65e-05	0.000717	3.14	0	3
153	CCN3	2.46	3.97e-05	0.000772	3.11	0	3
114801	LOC100130872	-2.48	3.98e-05	0.000772	3.11	0	7
55450	EFNA3	-4.22	4.03e-05	0.000779	3.11	0	3
10395	PLEKHH1	-3.61	4.24e-05	0.000815	3.09	0	3
54797	APOBEC1	-6.16	4.28e-05	0.000822	3.08	0	5
389643	SH3D21	-4.09	4.38e-05	0.00084	3.08	0	3
134	MANCR	-6.21	4.49e-05	0.000857	3.07	0	2
56975	CDC42SE2	-2.19	4.51e-05	0.000859	3.07	0	16
57168	LOC101928994	-7.72	4.56e-05	0.000868	3.06	0	4
140831	GALNT7	-3.16	4.71e-05	0.000893	3.05	0	2
344148	TNS4	-4.55	4.73e-05	0.000895	3.05	0	9
79154	NPIPB15	-4.28	4.73e-05	0.000896	3.05	0	1
221749	SIDT1	-4.02	4.87e-05	0.000921	3.04	0	1
27163	MAPK13	-3.96	5e-05	0.000941	3.03	0	4
23220	REN	-6.33	5.05e-05	0.000946	3.02	0	2
124872	GCG	-6.32	5.08e-05	0.00095	3.02	0	1
9212	TPMT	-2.42	5.58e-05	0.00103	2.99	0	1
55289	ESRRA	-2.18	5.68e-05	0.00105	2.98	0	2
7620	ZNF296	-4.04	5.68e-05	0.00105	2.98	0	4
3234	ARID5B	2.93	5.7e-05	0.00105	2.98	0	3
991	KNG1	-6.88	5.86e-05	0.00108	2.97	0	1
57579	LEAP2	-3.87	5.91e-05	0.00109	2.96	0	3
5745	ATG4D	-2.35	6.12e-05	0.00112	2.95	0	1
10507	NET1	-2.55	6.42e-05	0.00117	2.93	0	5
54602	APPL2	-3.33	6.43e-05	0.00117	2.93	0	5
26524	GEN1	-3.62	6.66e-05	0.0012	2.92	0	1
51447	LGALS3	-3.6	6.72e-05	0.00121	2.92	0	7
22853	MST1	-1.87	6.74e-05	0.00121	2.92	0	1
1182	CCNJL	-3.55	6.89e-05	0.00123	2.91	0	3
25946	C10orf95	-4.92	7.02e-05	0.00125	2.9	0	6
146894	CLEC17A	-5.91	7.19e-05	0.00128	2.89	0	2
5266	C3orf52	-4.13	7.25e-05	0.00129	2.89	0	2
571	TNFRSF18	-2.85	7.25e-05	0.00129	2.89	0	4
3561	RNF223	-4.5	7.42e-05	0.00131	2.88	0	4
440712	CLCA1	-4.54	7.54e-05	0.00133	2.88	0	2
8825	DYRK2	-2.5	7.62e-05	0.00134	2.87	0	1
440081	DACT1	1.92	7.63e-05	0.00134	2.87	0	1
157638	ISG20	-2.68	7.62e-05	0.00134	2.87	0	9
7039	CHKA	-2.38	7.79e-05	0.00136	2.87	0	1
100130449	GOLM1	-3.11	7.79e-05	0.00136	2.87	0	4
79774	C12orf75	-4.24	7.81e-05	0.00136	2.87	0	2
136332	C1orf74	-2.53	8e-05	0.00139	2.86	0	2
161753	PCDH1	-2.25	8.08e-05	0.0014	2.85	0	13
54361	PANK1	-3.89	8.13e-05	0.00141	2.85	0	1
348378	PARM1	-3.07	8.41e-05	0.00144	2.84	0	1
10420	CYP4F12	-3.35	8.77e-05	0.0015	2.82	0	1
162966	SPHK1	2.6	8.87e-05	0.00151	2.82	0	1
11126	CCDC183	-3.95	8.88e-05	0.00151	2.82	0	6
8702	NOXA1	-3.15	9.12e-05	0.00155	2.81	0	1
135644	PKP2	-3.5	9.13e-05	0.00155	2.81	0	2
286006	MIR3936HG	-3.26	9.51e-05	0.0016	2.79	0	1
9743	NAT8B	-5.01	9.59e-05	0.00161	2.79	0	1
54210	TREH	-3.73	9.71e-05	0.00163	2.79	0	4
301	CD2AP	-2.7	9.75e-05	0.00163	2.79	0	3
1559	CFAP92	-1.97	9.84e-05	0.00165	2.78	0	2
3177	ZNF823	-2.38	9.86e-05	0.00165	2.78	0	1
90362	OASL	-3.62	9.96e-05	0.00166	2.78	0	4
6653	FMNL2	1.39	0.000101601	0.00169	2.77	0	1
54932	NOS2	-3.94	0.000102294	0.0017	2.77	0	7
80005	SLC25A48	-4.9	0.000102385	0.0017	2.77	0	1
118813	MIR378I	-7.14	0.000103201	0.00171	2.77	0	1
133584	SPINK1	-5.05	0.000103277	0.00171	2.77	0	3
84069	MYO6	-2.12	0.000103481	0.00171	2.77	0	1
343035	RIPK4	-3.51	0.000103866	0.00172	2.77	0	3
55144	LINC01644	-7.5	0.000104384	0.00172	2.76	0	1
9940	DNM2	-2.26	0.000105759	0.00174	2.76	0	1
23135	NAMPT	3.07	0.000106927	0.00176	2.76	0	1
1088	CA7	-4.61	0.000112302	0.00184	2.74	0	3
8997	BEST2	-4.71	0.000121165	0.00195	2.71	0	5
9651	GGH	-3.15	0.000126058	0.00202	2.7	0	2
7130	HPDL	-3.71	0.000127151	0.00203	2.69	0	2
3487	LCN12	-3.72	0.000129947	0.00206	2.69	0	2
115677	EGLN3	-3.86	0.000133916	0.00212	2.67	0	1
162989	LINC01215	-5.61	0.000136153	0.00215	2.67	0	1
7045	GALNT8	-3.53	0.000137989	0.00217	2.66	0	8
163702	CCNE2	-3.52	0.000140494	0.0022	2.66	0	1
5460	C3orf85	-5.92	0.000140336	0.0022	2.66	0	2
2191	ZACN	4.87	0.000140905	0.00221	2.66	0	6
2119	COL4A3	-4.25	0.000141363	0.00221	2.66	0	1
643008	MTMR11	-3.25	0.00014309	0.00224	2.65	0	1
4225	LOC283710	-5.53	0.00014674	0.00229	2.64	0	3
11010	TLCD4	-2.51	0.000146902	0.00229	2.64	0	3
51043	DAPK2	-3.18	0.00014973	0.00233	2.63	0	1
2259	NDOR1	-1.75	0.000150061	0.00233	2.63	0	4
4038	SULT2B1	-3.17	0.000153937	0.00238	2.62	0	10
2762	SLC27A2	-4.52	0.000154733	0.00239	2.62	0	1
146206	PLEKHJ1	-2.37	0.000155565	0.0024	2.62	0	1
5729	NAGS	-3.73	0.000156015	0.0024	2.62	0	5
9854	PGAP3	-2.29	0.000156994	0.00242	2.62	0	1
84915	ERMN	-3.69	0.000158846	0.00244	2.61	0	8
1290	PLA2G4D	-6.36	0.000160759	0.00247	2.61	0	4
51659	LOC101927851	-4.19	0.000163526	0.0025	2.6	0	4
9456	MXD1	-3.56	0.000163804	0.0025	2.6	0	1
9	SLC16A5	-2.59	0.000164731	0.00251	2.6	0	11
55601	POLR1H	-7.46	0.000165331	0.00252	2.6	0	1
100506915	SEPTIN12	-6.05	0.000165533	0.00252	2.6	0	3
89796	TTC39A-AS1	-5.7	0.000166452	0.00253	2.6	0	4
1375	BRIP1	-3.81	0.000171125	0.00259	2.59	0	1
55907	GRAMD1C	-3.67	0.000174073	0.00263	2.58	0	6
123879	SPINK6	4.71	0.00017481	0.00263	2.58	0	2
54858	APOBR	-4.14	0.00017941	0.0027	2.57	0	6
353189	SCIN	-3.77	0.000180221	0.00271	2.57	0	1
3554	DRAIC	-3.76	0.000181795	0.00273	2.56	0	5
90	RAB11FIP1	-3.07	0.000183086	0.00274	2.56	0	1
5999	LINC01781	-6.95	0.000184427	0.00276	2.56	0	4
146802	SLC44A3	-2.24	0.000189928	0.00284	2.55	0	6
83888	HEPACAM2	-4.87	0.000204054	0.00302	2.52	0	5
6363	TMC4	-5.73	0.000204405	0.00303	2.52	0	2
430	SLC36A1	-2.91	0.000204887	0.00303	2.52	0	2
874	PROM2	-2.34	0.000205245	0.00303	2.52	0	7
1271	FSIP1	-3.35	0.000206081	0.00304	2.52	0	1
79573	C11orf80	-2.23	0.000206601	0.00305	2.52	0	3
157570	CCR9	-6.96	0.000209652	0.00309	2.51	0	1
401022	WSCD1	-3.11	0.000212974	0.00313	2.5	0	2
1803	ATP12A	-6.41	0.000221439	0.00324	2.49	0	4
1278	CXCR5	-5.7	0.000224512	0.00328	2.48	0	2
6997	ZFP36	2.29	0.000225984	0.00329	2.48	0	2
53904	NUP62CL	-4.32	0.000227422	0.00331	2.48	0	1
4582	ITIH3	-2.97	0.000227682	0.00331	2.48	0	1
25939	PLA2G2D	-4.34	0.000230182	0.00334	2.48	0	1
6744	CTRL	-2.57	0.000232593	0.00337	2.47	0	1
6236	MIR429	-6.99	0.000234522	0.0034	2.47	0	3
1907	MAP2K6	-2.44	0.000237203	0.00343	2.47	0	1
92521	SLC9A1	-1.93	0.00023724	0.00343	2.47	0	2
7431	LINC01342	-5.73	0.000237756	0.00343	2.46	0	3
84546	SMAGP	-3.71	0.000239749	0.00345	2.46	0	2
9540	AIM2	-4.15	0.000241134	0.00347	2.46	0	5
2671	TSPEAR	-5.41	0.000242796	0.00349	2.46	0	1
327657	ATP1B1	-2.52	0.000245253	0.00352	2.45	0	3
5078	NHSL1	-3.03	0.000252019	0.00359	2.44	0	12
104472713	CDCA7	-3.4	0.000254265	0.00362	2.44	0	1
79922	CYP4F35P	-3.82	0.000256647	0.00365	2.44	0	1
6768	ZWINT	-2.77	0.000256705	0.00365	2.44	0	1
284390	CMBL	-2.3	0.00026582	0.00376	2.42	0	2
81620	TRAF3IP3	-4.15	0.000266272	0.00376	2.42	0	2
30815	SLC4A9	-5.05	0.000273967	0.00386	2.41	0	1
399473	GLDN	-3.12	0.000276056	0.00389	2.41	0	1
9229	SMPD2	-2.52	0.000276581	0.00389	2.41	0	1
344805	ZBTB7C	-3.55	0.000278928	0.00392	2.41	0	10
11035	GBP3	-2.99	0.000286306	0.00402	2.4	0	2
10924	TNFRSF13C	-7.44	0.000286522	0.00402	2.4	0	5
3912	UPK3A	-5.41	0.000287669	0.00403	2.39	0	1
1235	ACSL5	-3.99	0.000289781	0.00406	2.39	0	9
1462	AMPD1	-4.58	0.000290754	0.00406	2.39	0	1
11046	CBARP	3.25	0.000290215	0.00406	2.39	0	4
10501	SLC7A11	-4.46	0.000290745	0.00406	2.39	0	5
115948	MICAL1	-2.93	0.000290707	0.00406	2.39	0	6
55191	LAMP3	-3.85	0.000293283	0.00409	2.39	0	1
3695	ENKUR	-3.79	0.00029562	0.0041	2.39	0	3
81569	ARID3B	-2.01	0.000296347	0.00411	2.39	0	1
3775	ACSS2	-2.71	0.000314402	0.00433	2.36	0	6
5152	CAMK2N1	-2.28	0.000316074	0.00435	2.36	0	1
4924	MED18	-1.9	0.000322376	0.00442	2.35	0	1
8862	NUGGC	-5.37	0.000325818	0.00446	2.35	0	2
5023	ADORA1	3.47	0.000325998	0.00446	2.35	0	3
2250	ASPHD2	-2.31	0.000327397	0.00447	2.35	0	1
158219	ZSWIM3	-1.55	0.000330113	0.0045	2.35	0	1
8659	DHRS11	-3.68	0.000336582	0.00458	2.34	0	2
6725	NAAA	-3.26	0.000343669	0.00466	2.33	0	1
901	DTX4	-2.82	0.000347326	0.0047	2.33	0	1
283848	AURKB	-3.78	0.000349809	0.00472	2.33	0	3
8325	ACOXL	-5.87	0.000349759	0.00472	2.33	0	6
55026	CDC20	-3.74	0.000353626	0.00475	2.32	0	1
1958	FAM135A	-2.11	0.000362565	0.00485	2.31	0	4
5883	SEMA4D	-1.95	0.000363167	0.00485	2.31	0	5
4595	NDFIP2	-2.64	0.000368129	0.00491	2.31	0	1
54058	IP6K2	-2.34	0.000374899	0.00499	2.3	0	2
646892	LMTK2	-2.44	0.000376662	0.005	2.3	0	4
80010	CLCN3	-1.93	0.000378922	0.00502	2.3	0	6
6279	ZNF385A	2.74	0.000381041	0.00504	2.3	0	5
27	PI3	-4.07	0.000387959	0.00512	2.29	0	3
163688	IL2RG	-4.27	0.000389819	0.00513	2.29	0	4
7004	DDX12P	-2.27	0.000400808	0.00526	2.28	0	2
10380	TGFA	-3.55	0.000404592	0.0053	2.28	0	3
8460	LOC100130449	-4.2	0.000407942	0.00534	2.27	0	3
7850	GRTP1	-2.95	0.000409719	0.00536	2.27	0	1
715	LRGUK	-2.63	0.000413468	0.00539	2.27	0	1
771	TESK2	-2.64	0.000416279	0.00542	2.27	0	3
2157	B4GALT4	-1.91	0.00042	0.00545	2.26	0	2
1440	TRIM40	-5.25	0.000427099	0.00553	2.26	0	3
9935	ARHGAP32	-2.38	0.000430238	0.00556	2.26	0	7
730087	CYP2C9	-5.45	0.000434228	0.00559	2.25	0	1
10736	SLC29A2	-2.81	0.000441084	0.00567	2.25	0	2
84057	SORL1	-2.93	0.000441714	0.00567	2.25	0	3
100996348	DOCK5	-2.36	0.000448421	0.00575	2.24	0	1
23550	PLEKHN1	-2.84	0.000455228	0.00582	2.24	0	3
25978	DLEC1	-3.71	0.000461557	0.00588	2.23	0	7
5051	CEACAM8	-6.03	0.000462289	0.00588	2.23	0	1
7594	KALRN	-2.43	0.000462129	0.00588	2.23	0	3
9162	DEDD2	-2	0.000473988	0.006	2.22	0	2
51233	TGFBI	2.07	0.000475611	0.00601	2.22	0	1
2064	IFNLR1	-3.84	0.000477756	0.00602	2.22	0	1
219790	ETV5	1.68	0.000483979	0.00609	2.22	0	2
79365	SMIM5	-4.05	0.00048781	0.00614	2.21	0	1
55509	MEP1B	-3.33	0.000490951	0.00617	2.21	0	2
387763	ZBTB7B	-2.11	0.000493753	0.00619	2.21	0	8
79661	LRP4	-3.84	0.000494836	0.0062	2.21	0	2
55277	GMDS	-2.49	0.000495304	0.0062	2.21	0	1
2006	CARMIL2	-3.04	0.000497358	0.00621	2.21	0	6
163486	PTGDR	-3.76	0.000499056	0.00623	2.21	0	2
9507	FAM222A	1.17	0.000504128	0.00628	2.2	0	5
64900	GINS2	-2.64	0.000506223	0.0063	2.2	0	3
9023	NAT1	-3.23	0.000510625	0.00635	2.2	0	8
56242	DDX60	-3.07	0.000512662	0.00636	2.2	0	1
196446	CHRM3-AS2	-6.04	0.000512664	0.00636	2.2	0	2
55314	CMAS	-1.91	0.000527674	0.00653	2.19	0	2
10560	PGPEP1	-2.04	0.000529449	0.00655	2.18	0	4
3671	SLCO4C1	-4.77	0.000529814	0.00655	2.18	0	1
83648	RGS4	3.18	0.000531881	0.00656	2.18	0	2
10298	SLC47A2	-6.61	0.000537645	0.00662	2.18	0	2
9304	FGFBP2	3.06	0.000547001	0.00673	2.17	0	9
79829	CCL19	-4.25	0.000548245	0.00674	2.17	0	1
79611	CBR3	1.85	0.000549687	0.00675	2.17	0	4
23035	CNTFR	2.16	0.000555587	0.00681	2.17	0	5
79789	TTC13	-1.71	0.000556629	0.00682	2.17	0	3
3934	ESCO2	-4.18	0.000566674	0.00693	2.16	0	1
91608	DPP4	-2.2	0.000567321	0.00693	2.16	0	1
716	MUC1	-3.22	0.000576941	0.00702	2.15	0	5
387332	SAMHD1	2.24	0.00058392	0.0071	2.15	0	2
341116	SNORD35B	-2.65	0.000601761	0.00726	2.14	0	1
8531	SERPINA9	-6.26	0.000603288	0.00727	2.14	0	3
11060	PCAT29	-6.63	0.000603961	0.00727	2.14	0	1
79818	ST14	-4.1	0.0006108	0.00734	2.13	0	2
55592	CDT1	-2.85	0.000622444	0.00745	2.13	0	1
94241	ST6GALNAC6	-2.17	0.000625549	0.00748	2.13	0	2
79666	TMPRSS7	-5.71	0.000632864	0.00755	2.12	0	1
127707	RIPK3	-3.73	0.000645342	0.00768	2.11	0	9
90273	LAMB1	1.89	0.000648486	0.00771	2.11	0	1
84912	SLC35D2	-2.3	0.000662807	0.00786	2.1	0	2
3604	CCDC151	2.43	0.000664729	0.00787	2.1	0	1
119391	APLN	3.28	0.000685411	0.00808	2.09	0	2
132158	SRMS	-5.39	0.000700457	0.00822	2.08	0	1
64838	CCNG2	-2.28	0.000701011	0.00823	2.08	0	1
51155	EGR1	3.44	0.0007146	0.00835	2.08	0	1
54905	RAD9A	-1.95	0.000720315	0.0084	2.08	0	3
5860	MUTYH	-1.9	0.000721295	0.0084	2.08	0	5
10468	RMI1	-1.63	0.000723299	0.00841	2.07	0	1
79899	S100A8	4.41	0.000723488	0.00841	2.07	0	1
5564	TEAD4	2.63	0.000731835	0.00849	2.07	0	4
100130889	BPNT1	-1.94	0.000732104	0.00849	2.07	0	4
143	IL1R2	-3.71	0.00073745	0.00854	2.07	0	9
9021	C1R	2.89	0.000745377	0.00861	2.06	0	3
29765	CA12	-4.16	0.000745406	0.00861	2.06	0	4
1808	F8	3.04	0.000746571	0.00862	2.06	0	1
4357	CSF3	4.87	0.000747505	0.00863	2.06	0	8
2175	MND1	-3.02	0.00077	0.00884	2.05	0	1
23012	CA3-AS1	-2.48	0.000774038	0.00888	2.05	0	3
2897	DRICH1	-3.62	0.000795175	0.00908	2.04	0	1
3614	RTKN2	-4.5	0.000816229	0.0093	2.03	0	2
284454	C11orf96	3.46	0.000831969	0.00945	2.02	0	1
81285	NEIL1	-2.05	0.000833526	0.00946	2.02	0	7
26256	LPIN3	-2.58	0.000851868	0.00961	2.02	0	3
1741	CH25H	3.3	0.000852849	0.00962	2.02	0	1
9855	MYRFL	-5.7	0.000864265	0.00973	2.01	0	2
2146	FAM167A	-2.62	0.000876226	0.00984	2.01	0	7
85379	SNORD22	-3.31	0.000882627	0.00989	2	0	4
94081	NAA40	-1.7	0.000883344	0.00989	2	0	1
1326	PHLPP2	-2.74	0.000893237	0.00999	2	0	4
84458	CLMN	-2.75	0.00089623	0.01	2	0	1
214	LCN2	-4.21	0.000901743	0.01	2	0	1
284948	MS4A10	-5.51	0.000921252	0.01	1.99	0	7
153579	ZNF552	-2.06	0.000930325	0.01	1.99	0	1
80111	GOLGA2P5	-2.73	0.000934947	0.01	1.98	0	1
113179	PLEKHF2	-1.81	0.000938197	0.01	1.98	0	2
3857	KLHDC7A	-5.74	0.000948284	0.01	1.98	0	2
10232	GSTO2	-2.8	0.000975443	0.011	1.97	0	3
100874055	GLYCTK	-2.81	0.000977478	0.011	1.97	0	3
100127888	JPT1	-2.86	0.000988268	0.011	1.97	0	5
1588	CYP2W1	-3.66	0.000991738	0.011	1.96	0	2
8115	PRKAB1	-1.72	0.00100341	0.011	1.96	0	1
80832	PSORS1C3	-5.96	0.00102377	0.011	1.95	0	6
23207	SOCS3	3.93	0.00104308	0.011	1.94	0	1
11065	MPST	-2.2	0.001045	0.011	1.94	0	11
63027	IMPDH1	1.7	0.00105188	0.011	1.94	0	1
3097	OR51E2	3.87	0.00105725	0.011	1.94	0	1
105369954	DLG3	-2.06	0.00107188	0.012	1.94	0	1
7430	FARP2	-1.76	0.00107539	0.012	1.94	0	9
4253	EZH2	-2.69	0.00108625	0.012	1.93	0	2
2219	KIAA1671	-2.9	0.00109673	0.012	1.93	0	8
6650	SFXN1	-2.17	0.00109808	0.012	1.93	0	1
730198	ALCAM	1.69	0.00112761	0.012	1.92	0	1
8694	SH2D6	-3.12	0.00114121	0.012	1.91	0	1
84627	C3orf36	-2.79	0.00116824	0.012	1.9	0	2
79840	MSLN	-3.91	0.00117541	0.013	1.9	0	13
26996	SLCO4A1-AS1	-4.63	0.00117966	0.013	1.9	0	7
81788	APOL4	2.46	0.00118505	0.013	1.9	0	5
9825	UBE2C	-3.9	0.00118632	0.013	1.9	0	3
53831	KCCAT198	-6.18	0.00119256	0.013	1.9	0	2
27004	EZR	-2.12	0.00120223	0.013	1.9	0	1
64084	CAPN15	-1.82	0.00121196	0.013	1.89	0	10
4323	NUAK2	-2.94	0.00124396	0.013	1.88	0	1
8600	SPATA2	-1.67	0.00124648	0.013	1.88	0	6
308	GPR84	3.82	0.00125146	0.013	1.88	0	1
79917	TCL6	-6.55	0.00125214	0.013	1.88	0	3
84695	CLSTN2	3.12	0.001258	0.013	1.88	0	1
5163	TNFSF11	-5.24	0.00127461	0.013	1.88	0	2
4752	LOXL3	1.94	0.00128525	0.013	1.87	0	4
8000	PSCA	-6.31	0.00130527	0.014	1.87	0	3
56729	TMEM37	-3.58	0.00131313	0.014	1.87	0	2
3038	LUC7L3	-1.92	0.00132245	0.014	1.86	0	2
140738	PRKD2	-1.66	0.00133745	0.014	1.86	0	4
1357	PTGDR2	-2.49	0.00138144	0.014	1.85	0	7
51747	MAST3	-1.64	0.00138389	0.014	1.85	0	4
773	NPNT	-1.66	0.00139694	0.014	1.85	0	2
64123	FCRL3	-5.17	0.00140144	0.014	1.84	0	1
4237	SLC37A4	-1.88	0.0014143	0.014	1.84	0	4
79607	PRAG1	-2.81	0.00142083	0.014	1.84	0	2
25865	LY75	-4.03	0.00143539	0.015	1.84	0	3
5740	PLBD2	1.49	0.00143664	0.015	1.84	0	1
54510	CACFD1	-1.8	0.00143939	0.015	1.84	0	3
11251	NOTCH2	1.51	0.00145038	0.015	1.83	0	1
23031	RNF128	-3.98	0.00145502	0.015	1.83	0	2
255743	PELO	1.19	0.00147625	0.015	1.83	0	1
6195	SNORD80	-2.29	0.00148963	0.015	1.82	0	1
115352	PCAT18	-5.57	0.00149918	0.015	1.82	0	2
2542	ABCA7	-2.11	0.0015824	0.016	1.8	0	1
117177	LDC1P	-6.09	0.00158806	0.016	1.8	0	1
157285	HOXC6	3.62	0.00160685	0.016	1.8	0	1
23541	H3C8	-3.48	0.00160741	0.016	1.8	0	2
6819	MYL12B	-2.04	0.00161632	0.016	1.8	0	1
4065	TNNT2	-4.01	0.00162295	0.016	1.79	0	18
196463	RBMS1	2.37	0.00163474	0.016	1.79	0	3
7450	RNF122	2.64	0.00163842	0.016	1.79	0	2
11094	PASK	-1.98	0.00165144	0.016	1.79	0	2
3846	KLRC1	-2.59	0.00165314	0.016	1.79	0	2
4853	CHRNA1	-4.61	0.00166512	0.016	1.79	0	1
79589	BEST1	1.99	0.00166662	0.016	1.79	0	1
91663	HSBP1L1	-2.49	0.00166831	0.016	1.79	0	4
169792	IL21R	-3.36	0.00167753	0.016	1.78	0	6
53918	FMO3	4.02	0.00168276	0.016	1.78	0	2
26774	PRR13	-2.22	0.00168355	0.016	1.78	0	2
728606	UBE2T	-1.59	0.00169385	0.017	1.78	0	1
253738	TNFSF10	-3.3	0.00169393	0.017	1.78	0	2
89766	CYSTM1	-2.39	0.00169979	0.017	1.78	0	2
220929	EFNA4	-2.57	0.00172849	0.017	1.78	0	4
8793	CANT1	-2.29	0.00172851	0.017	1.78	0	5
253982	CYP4F11	-4.16	0.00173144	0.017	1.77	0	1
373863	LINC01588	-2.72	0.00173223	0.017	1.77	0	3
57190	CD164L2	-5.65	0.00173527	0.017	1.77	0	2
51228	CEBPG	-1.67	0.00174657	0.017	1.77	0	3
10347	HDAC1	-1.63	0.00175566	0.017	1.77	0	3
149086	PLXNA2	-2.02	0.00176096	0.017	1.77	0	4
5209	RUNDC1	-1.25	0.00176584	0.017	1.77	0	1
3223	ZZEF1	-1.82	0.00176594	0.017	1.77	0	1
8355	RNASEK	-2.18	0.00176421	0.017	1.77	0	1
5327	MYEOV	-4.08	0.00179082	0.017	1.77	0	3
103910	LOC644285	-1.49	0.00180997	0.017	1.76	0	1
7139	SQOR	-1.76	0.00181792	0.017	1.76	0	4
5937	LINC01558	-3.35	0.00182039	0.017	1.76	0	3
79845	SLC35B3	-1.54	0.00182685	0.017	1.76	0	2
23178	CFAP70	-1.45	0.00184051	0.018	1.76	0	1
3821	MROH7	-2.5	0.0018694	0.018	1.75	0	4
8536	BLNK	-3.07	0.00186936	0.018	1.75	0	8
4868	KLC4	-1.89	0.00191505	0.018	1.74	0	3
1134	MKRN1	-1.54	0.00191807	0.018	1.74	0	3
7439	RAVER2	-2.14	0.00192268	0.018	1.74	0	2
440498	BNIPL	-3.54	0.00194752	0.018	1.74	0	1
140460	FRAT2	-1.92	0.00195009	0.018	1.74	0	3
50615	MGAT4A	-2.66	0.00195673	0.018	1.74	0	5
2328	FOXRED2	1.52	0.00196187	0.018	1.74	0	1
54458	PRL	4.97	0.001972	0.018	1.73	0	3
338328	PDSS1	-1.68	0.00198433	0.019	1.73	0	1
2900	ZBTB21	1.56	0.00198561	0.019	1.73	0	2
29089	GOLPH3L	-1.34	0.00199569	0.019	1.73	0	1
8743	CCDC14	-2	0.00199904	0.019	1.73	0	3
1390	PROS1	1.35	0.0020042	0.019	1.73	0	1
84418	FAM234B	2.36	0.00200527	0.019	1.73	0	2
4017	NT5C	-1.61	0.00200758	0.019	1.73	0	2
51315	PRELID3B	-1.48	0.00204192	0.019	1.72	0	2
54502	TMEM63C	-2.21	0.00205088	0.019	1.72	0	6
1945	LRRC36	-3.08	0.00207202	0.019	1.72	0	1
124583	AGBL2	-2.13	0.00208413	0.019	1.72	0	1
57834	AGT	1.5	0.00210031	0.019	1.71	0	1
283551	POLR2H	-1.91	0.00212156	0.019	1.71	0	3
388611	COL19A1	-3.66	0.00212416	0.019	1.71	0	6
497190	INPP5J	-2.82	0.00216064	0.02	1.7	0	2
1054	CDK18	-1.71	0.00218442	0.02	1.7	0	8
152002	SNORA60	-5.03	0.00219081	0.02	1.7	0	1
3065	C11orf53	-4.54	0.00222928	0.02	1.69	0	1
5362	RHOV	-3.38	0.00222925	0.02	1.69	0	4
146923	C7orf31	-1.05	0.00223045	0.02	1.69	0	1
23140	PPP1R16A	-1.82	0.0022386	0.02	1.69	0	5
440400	SPC24	-2.8	0.00225821	0.02	1.69	0	3
26579	TCP10L2	-5.77	0.0022663	0.02	1.69	0	2
3572	KCNN4	-3.1	0.00227196	0.02	1.69	0	11
644285	NAPSB	-3.29	0.00228203	0.021	1.69	0	2
58472	OXNAD1	-1.62	0.00228911	0.021	1.69	0	2
26238	PALMD	3.1	0.00229189	0.021	1.69	0	3
51000	RUFY4	-4.68	0.00229878	0.021	1.68	0	3
118491	IL37	-7.08	0.00231021	0.021	1.68	0	1
50509	CFAP73	-3.11	0.00231176	0.021	1.68	0	1
286749	KLF17	2.53	0.00232017	0.021	1.68	0	3
374977	ZDHHC12	-1.93	0.00232315	0.021	1.68	0	1
29760	NFKBIZ	1.88	0.00232349	0.021	1.68	0	3
8444	NKAIN1	2.68	0.00235845	0.021	1.68	0	2
1435	DGUOK-AS1	-3.94	0.00237797	0.021	1.67	0	2
3651	CASP10	-2.87	0.00237914	0.021	1.67	0	9
284716	CEP85	-1.11	0.00238367	0.021	1.67	0	3
51175	TPSD1	-3.69	0.00240207	0.021	1.67	0	4
4502	KCTD5	-1.84	0.00241355	0.021	1.67	0	1
89953	TMPRSS3	-3.69	0.00241894	0.021	1.67	0	9
389136	DEPDC1B	-3.08	0.00243333	0.022	1.67	0	1
23608	NINJ1	1.95	0.00244727	0.022	1.66	0	2
55225	CCL7	5.08	0.00244874	0.022	1.66	0	2
79675	GAK	-1.7	0.00247422	0.022	1.66	0	1
6296	IKZF3	-3.72	0.00247747	0.022	1.66	0	1
130617	CCDC186	-1.52	0.00249542	0.022	1.66	0	2
149428	LIME1	-1.53	0.00250584	0.022	1.66	0	13
23401	ARRDC2	-1.16	0.0025554	0.022	1.65	0	2
11320	ANXA13	-2.47	0.00256177	0.022	1.65	0	2
80020	FBXO34	-2.08	0.00257355	0.022	1.65	0	12
5617	IL1RAP	1.78	0.00257839	0.022	1.65	0	4
23590	RAPGEF5	-1.63	0.00257946	0.022	1.65	0	5
49854	FOXD2-AS1	-3.09	0.00261294	0.023	1.64	0	3
8428	HECW2-AS1	-5.01	0.00262461	0.023	1.64	0	1
55204	SEPTIN1	-1.99	0.00266261	0.023	1.64	0	1
64770	AGXT	-3.83	0.00267563	0.023	1.64	0	2
5627	ARHGAP42	-1.94	0.00271947	0.023	1.63	0	1
57613	NDUFA4L2	2.3	0.0027206	0.023	1.63	0	2
30833	SPAG5	-2.48	0.0027743	0.024	1.62	0	2
374864	TMEM63B	-1.93	0.00281461	0.024	1.62	0	3
54829	RNF103-CHMP3	-5.39	0.00284992	0.024	1.62	0	2
11167	CREB3L1	-2.52	0.00285666	0.024	1.62	0	3
9961	CCDC88B	-2.07	0.00287747	0.024	1.61	0	3
140564	PBK	-4.02	0.00288818	0.024	1.61	0	1
285848	KCNK5	-2.57	0.00291348	0.025	1.61	0	2
51012	OAS1	-2.75	0.00292639	0.025	1.61	0	3
57156	CYP1B1	3.94	0.00293366	0.025	1.61	0	4
162461	AAGAB	-1.57	0.00294445	0.025	1.61	0	2
55282	SULT1A1	-3.64	0.00294697	0.025	1.61	0	1
2527	LINC02889	-5.64	0.00294941	0.025	1.6	0	3
7100	NR4A3	3.78	0.00297922	0.025	1.6	0	4
79841	KREMEN2	-5.48	0.00298551	0.025	1.6	0	1
594855	VRK3	-1.37	0.00299172	0.025	1.6	0	2
183	CDH6	2.6	0.00299066	0.025	1.6	0	4
6299	ARHGEF40	1.23	0.00301336	0.025	1.6	0	1
5437	GJB2	-3.55	0.00301744	0.025	1.6	0	6
1310	CLDN12	-1.82	0.00304054	0.025	1.59	0	6
27124	AKAP5	-2.4	0.00305522	0.026	1.59	0	4
339983	SLC52A1	-3.44	0.00306636	0.026	1.59	0	1
5129	SVOPL	-3.46	0.00310189	0.026	1.59	0	2
677837	FANCD2	-2.22	0.00311514	0.026	1.59	0	1
3198	MMP28	-3.1	0.00311422	0.026	1.59	0	4
211	CEP170B	-1.77	0.00313652	0.026	1.59	0	1
9080	SLC35B2	0.81	0.00317949	0.026	1.58	0	2
341032	GFI1B	-3.94	0.00318602	0.026	1.58	0	3
171177	SLC25A32	1.58	0.00319524	0.026	1.58	0	1
136895	NOLC1	1.65	0.00319844	0.026	1.58	0	1
84988	SYNE4	-2.82	0.00321532	0.027	1.58	0	1
677	TRIM13	-0.74	0.00321997	0.027	1.58	0	4
29121	KCNJ16	-5.18	0.00322335	0.027	1.58	0	8
147841	OXSM	-1.18	0.00325573	0.027	1.57	0	1
5333	MMD	1.81	0.00325185	0.027	1.57	0	2
58476	LHFPL3-AS2	-3.38	0.00325266	0.027	1.57	0	2
401285	MPZL2	-2.7	0.0032676	0.027	1.57	0	6
54763	NEBL	-1.9	0.00328601	0.027	1.57	0	4
8318	ENO3	-1.58	0.00330445	0.027	1.57	0	1
3783	HOOK2	-2.03	0.00332676	0.027	1.57	0	3
256236	CCNE1	-1.56	0.00333099	0.027	1.57	0	2
92106	POC1A	-2.08	0.00333858	0.027	1.56	0	2
54873	PHLDA1	2.65	0.00335366	0.027	1.56	0	1
285180	ARHGAP45	-2.6	0.00341684	0.028	1.56	0	14
100506188	PPIL2	-1.3	0.00342579	0.028	1.56	0	3
27178	TPSAB1	-2.57	0.00350186	0.028	1.55	0	2
387885	CACNA1I	-2.75	0.00351806	0.028	1.55	0	4
128209	AVIL	-2.77	0.00352123	0.028	1.55	0	3
84885	C6orf223	-3.69	0.00352504	0.028	1.55	0	3
64332	GRAMD2B	-2.11	0.00354138	0.028	1.55	0	7
94031	SNAPC2	1.13	0.00354776	0.028	1.55	0	4
55422	NR4A1	2.48	0.00357945	0.029	1.54	0	8
79570	TRIM29	-2.46	0.00358259	0.029	1.54	0	9
100874048	MTVR2	-5.3	0.00358443	0.029	1.54	0	2
843	BGN	2.52	0.00359663	0.029	1.54	0	1
1500	CD58	-2.09	0.00361832	0.029	1.54	0	2
10207	HOMER3	2	0.00364508	0.029	1.54	0	4
64793	HELLS	-2.3	0.00365948	0.029	1.54	0	2
11184	SNORA4	-3.16	0.00368961	0.029	1.53	0	2
84067	PYGL	2.2	0.00369463	0.029	1.53	0	1
23430	TSEN54	-1.45	0.00372163	0.029	1.53	0	1
54442	FGFR4	-2.57	0.00372969	0.029	1.53	0	8
64699	BMP2	-2.56	0.00377186	0.03	1.53	0	6
56243	SLC51A	-3.5	0.00379486	0.03	1.53	0	6
55789	KIF16B	-1.74	0.00380006	0.03	1.52	0	1
79903	MAGED1	0.97	0.00383009	0.03	1.52	0	1
80031	STARD4	-2.32	0.00385962	0.03	1.52	0	1
4814	CD22	-4.15	0.00389513	0.03	1.52	0	3
6354	MIR559	-5.35	0.00392204	0.031	1.51	0	1
51332	SMIM15	-1.13	0.00393788	0.031	1.51	0	2
285527	LINC00513	-3.49	0.00396072	0.031	1.51	0	1
84570	CHST1	2.05	0.00396573	0.031	1.51	0	6
22821	JUN	1.79	0.00409362	0.032	1.5	0	1
2580	MYL5	-2.25	0.00409718	0.032	1.5	0	2
22806	CCIN	3.43	0.00410259	0.032	1.5	0	2
284346	MELK	-3.06	0.0041092	0.032	1.5	0	3
151484	GASK1A	2.57	0.00416898	0.032	1.49	0	2
155	GALK1	1.39	0.00418033	0.032	1.49	0	3
55088	LOC100507002	-1.92	0.00419886	0.032	1.49	0	1
54923	PRDX6	-1.91	0.00422463	0.032	1.49	0	2
54900	PHETA1	-1.53	0.00425546	0.033	1.49	0	2
7070	RAB6D	-3.66	0.00428386	0.033	1.49	0	1
1376	FOXM1	-3.28	0.00430364	0.033	1.48	0	1
25966	IFI35	-0.59	0.00432502	0.033	1.48	0	1
407014	ASF1B	-3.22	0.00433864	0.033	1.48	0	1
27106	PI15	2.05	0.00434074	0.033	1.48	0	2
220296	PARS2	-1.09	0.00434975	0.033	1.48	0	1
312	TOR4A	-2.55	0.00435374	0.033	1.48	0	8
55030	STRBP	-1.38	0.0043704	0.033	1.48	0	3
3556	ASS1	-1.84	0.00439958	0.033	1.48	0	2
9771	UROS	1.1	0.00440419	0.033	1.48	0	1
10840	SNORD78	-4.79	0.0044066	0.033	1.48	0	1
255738	KRTAP5-5	-6.33	0.00442315	0.033	1.48	0	2
9389	TACO1	-0.96	0.00447302	0.034	1.47	0	1
84793	MINK1	-1.59	0.00447385	0.034	1.47	0	1
6283	DHX32	-1.6	0.0044763	0.034	1.47	0	1
101927482	LRFN1	1.78	0.00451283	0.034	1.47	0	1
57523	APOBEC4	-5.55	0.00452618	0.034	1.47	0	2
6624	CPA3	-2.78	0.00452539	0.034	1.47	0	3
1236	TONSL	-1.5	0.00455129	0.034	1.47	0	1
5153	LRRFIP2	-1.47	0.0045593	0.034	1.47	0	4
7980	ACTG1P25	-3.55	0.00460484	0.034	1.46	0	1
1731	ADH1B	2.85	0.00462032	0.035	1.46	0	1
56128	KRT2	-5.65	0.00461994	0.035	1.46	0	3
6774	CCR8	-4.54	0.00463128	0.035	1.46	0	2
342527	LOXHD1	3.63	0.00464953	0.035	1.46	0	17
189	GRINA	1.48	0.0046597	0.035	1.46	0	1
143872	SNORA26	-3.26	0.00466574	0.035	1.46	0	1
56901	NR0B2	-5.25	0.00466989	0.035	1.46	0	11
55423	CCDC120	-1.65	0.00467275	0.035	1.46	0	2
2	CAPN6	-1.73	0.00475816	0.035	1.45	0	4
151648	ARMC9	1.55	0.00476191	0.035	1.45	0	2
57159	PARVB	1.62	0.00477172	0.035	1.45	0	4
10615	GPR3	2.47	0.0048185	0.036	1.45	0	1
5538	PCBP3	2.54	0.00483769	0.036	1.45	0	2
80326	CDK5RAP3	-1.57	0.00487775	0.036	1.44	0	2
55362	GAS2L3	-1.56	0.00487902	0.036	1.44	0	5
390205	GGN	3.36	0.00489178	0.036	1.44	0	1
7292	FAM83G	-2.43	0.00494106	0.036	1.44	0	1
257144	TLE4	0.69	0.00493962	0.036	1.44	0	2
101928363	HOXA-AS3	-2.74	0.00497009	0.036	1.44	0	3
100526767	NOL12	-1.45	0.0050037	0.037	1.44	0	3
57630	DHX16	-4.18	0.00501402	0.037	1.43	0	1
1238	CADPS2	1.23	0.00503104	0.037	1.43	0	1
90993	TIPARP	1.37	0.00505104	0.037	1.43	0	3
145258	OXLD1	-1.09	0.00507267	0.037	1.43	0	1
221091	EFCAB5	-2.97	0.00508241	0.037	1.43	0	1
283234	ZNF490	-0.92	0.00508896	0.037	1.43	0	1
55872	LINC01191	-5.03	0.00510582	0.037	1.43	0	3
8645	HSPA8	1.25	0.00515294	0.038	1.43	0	1
4938	NFATC1	2.51	0.0051703	0.038	1.42	0	6
374987	CHSY3	2.91	0.00517277	0.038	1.42	0	2
1545	ERFE	3.18	0.00521453	0.038	1.42	0	1
6898	NIPAL4	3.36	0.00521796	0.038	1.42	0	3
79719	CENPF	-2.14	0.00523345	0.038	1.42	0	2
6817	TEDC1	-1.93	0.00524048	0.038	1.42	0	1
101927630	NLRP2	-6.76	0.00524833	0.038	1.42	0	1
114805	PLGRKT	-1.76	0.00527295	0.038	1.42	0	3
79442	DIO3OS	-2.61	0.00527677	0.038	1.42	0	3
56106	MCRIP2	-1.67	0.00534149	0.038	1.42	0	2
8013	GIPC2	-2.36	0.00536648	0.038	1.41	0	2
79412	MDFIC	1.92	0.00538316	0.039	1.41	0	4
51231	HK3	3.28	0.00541785	0.039	1.41	0	2
1004	ZMAT3	0.83	0.00547112	0.039	1.41	0	1
55701	IKBKE	-2.38	0.00549666	0.039	1.41	0	7
1718	TUBA4A	-1.14	0.00551823	0.039	1.41	0	1
2706	ZMYND8	-1.42	0.00553356	0.039	1.4	0	9
9196	TEX45	-3.17	0.00554331	0.039	1.4	0	3
9069	CXCL8	3.56	0.00559121	0.04	1.4	0	3
9495	CAPN2	-1.76	0.0055953	0.04	1.4	0	4
664	UBALD2	-1.71	0.00559773	0.04	1.4	0	4
2011	PSD3	-1.62	0.00560391	0.04	1.4	0	2
55065	RREB1	-1.34	0.0056021	0.04	1.4	0	13
340784	DOP1B	-1.61	0.00560592	0.04	1.4	0	6
4821	SPATA6L	-1.97	0.00562049	0.04	1.4	0	2
81849	TMEM176B	-1.77	0.00562313	0.04	1.4	0	3
338557	APOB	3.8	0.00564816	0.04	1.4	0	2
5768	MALRD1	2.8	0.00574846	0.04	1.39	0	3
136306	PSORS1C1	-3.54	0.00576486	0.041	1.39	0	6
2177	NR3C2	-1.98	0.00578374	0.041	1.39	0	2
79148	MTM1	-1.61	0.005801	0.041	1.39	0	2
283638	DUSP21	-5.07	0.00586809	0.041	1.39	0	2
4628	FAM24B	-1.74	0.00588813	0.041	1.39	0	1
6939	MGAM2	-5.16	0.00591148	0.041	1.38	0	2
6678	OTULINL	-2.6	0.0059301	0.041	1.38	0	1
347734	CCNB2	-2.99	0.0059422	0.041	1.38	0	2
8328	FAM241A	2.03	0.00605537	0.042	1.38	0	1
81034	WFDC21P	-1.53	0.00607564	0.042	1.37	0	2
9221	RAB24	-1.27	0.0061645	0.043	1.37	0	1
3137	NCMAP	-3.59	0.00618722	0.043	1.37	0	2
163183	MCM10	-2.95	0.00624096	0.043	1.36	0	1
10206	AGFG2	-1.35	0.00624827	0.043	1.36	0	2
399	CHRD	1.65	0.00624806	0.043	1.36	0	4
3773	PGAP6	-1.6	0.00636885	0.044	1.36	0	2
9586	GBA3	-3.21	0.00640332	0.044	1.36	0	4
4057	MYO5C	-2.74	0.00643663	0.044	1.35	0	1
54995	BFSP2	-5.34	0.00644929	0.044	1.35	0	1
23531	TEX10	1.27	0.00647445	0.044	1.35	0	2
723809	ATG16L2	-1.73	0.00652439	0.045	1.35	0	1
201254	MYO5A	1.54	0.00652683	0.045	1.35	0	2
10205	ARHGAP24	1.72	0.0065328	0.045	1.35	0	11
10529	UNC13D	-2.33	0.00654077	0.045	1.35	0	8
3486	ALDH18A1	-1.99	0.00656048	0.045	1.35	0	2
2027	ARHGEF10L	-1.27	0.00656244	0.045	1.35	0	22
93426	HACD3	1.1	0.00659414	0.045	1.35	0	1
29911	RAB3IL1	1.78	0.00659516	0.045	1.35	0	3
898	C9orf139	-2.62	0.00660302	0.045	1.35	0	5
25886	GABRP	-3.98	0.00662359	0.045	1.35	0	3
22822	ARHGAP22	1.52	0.00668121	0.045	1.34	0	8
347240	MYO10	-1.99	0.00670366	0.045	1.34	0	1
467	PPARD	-1.75	0.0067025	0.045	1.34	0	2
23526	TMEM164	-2.05	0.00670866	0.046	1.34	0	4
23759	PRRT4	3.03	0.00673184	0.046	1.34	0	2
9903	EAPP	-1.28	0.00675461	0.046	1.34	0	1
8353	C7	2.74	0.00675883	0.046	1.34	0	1
4232	LINC00930	-3.93	0.00676798	0.046	1.34	0	1
51474	RUNDC3B	-1.87	0.00679081	0.046	1.34	0	1
80759	FRMD3	-1.49	0.00681429	0.046	1.34	0	2
29940	SLC2A1	-2.09	0.00688349	0.046	1.33	0	1
7177	RAP1GAP	-2.53	0.00690634	0.046	1.33	0	3
8911	MAP3K14-AS1	-2.83	0.00696225	0.047	1.33	0	1
10677	LPCAT1	1.72	0.00699102	0.047	1.33	0	2
221416	PPDPF	-1.02	0.00701662	0.047	1.33	0	1
65983	TUBB3	2.51	0.00701423	0.047	1.33	0	5
116441	ZNF169	-1.64	0.00703114	0.047	1.33	0	5
6618	PERP	-1.76	0.00703692	0.047	1.33	0	1
7532	ATP6V1F	1.36	0.0070409	0.047	1.33	0	1
55106	TMEM234	-1.5	0.00704983	0.047	1.33	0	1
23315	ELL2	1.85	0.00706659	0.047	1.33	0	1
440585	MIR200A	-4.76	0.00706844	0.047	1.33	0	3
3978	CES1	3.35	0.00711142	0.047	1.32	0	1
3164	RSPH3	-1.05	0.00716507	0.048	1.32	0	1
100507050	CLTB	-1.61	0.00717234	0.048	1.32	0	1
23650	SLC25A38	-0.95	0.00721524	0.048	1.32	0	1
246754	RCVRN	2.72	0.0072245	0.048	1.32	0	4
633	JSRP1	-1.97	0.00727517	0.048	1.32	0	3
201305	AURKA	-1.93	0.00739485	0.049	1.31	0	1
476	C6orf132	-3.26	0.00740823	0.049	1.31	0	4
965	GMPR	1.75	0.00744355	0.049	1.31	0	4
2022	GPD1L	-1.32	0.00755359	0.049	1.31	0	1
9454	TIMP1	2.48	0.00764439	0.05	1.3	0	1
3070	ITGA6	-1.63	0.00764182	0.05	1.3	0	3
388324	MYBPC1	-7.49	3.11e-16	1.63e-13	12.79	3	0
8609	PRSS16	-7.63	3.51e-14	8.2e-12	11.09	6	0
619568	PRSS12	-6.08	1.04e-12	1.52e-10	9.82	1	0
5836	DUOX2	-7.36	5.95e-12	7.03e-10	9.15	1	0
283989	ERN2	-7.42	1.27e-11	1.33e-09	8.88	1	0
10516	DSP	-5.85	2.03e-11	1.96e-09	8.71	1	0
2264	CHP2	-6.6	9.23e-11	7.45e-09	8.13	2	0
9088	CCN1	3.92	1.81e-10	1.37e-08	7.86	1	0
650	ITPKA	-5.31	4.67e-10	3.18e-08	7.5	1	0
51196	AKR7A3	-5.9	7.16e-10	4.68e-08	7.33	4	0
200931	OVOL1	-6.2	1.04e-09	6.56e-08	7.18	2	0
55614	CNGA1	-6.6	1.1e-09	6.88e-08	7.16	2	0
444	SLC15A1	-6.74	1.16e-09	7.21e-08	7.14	1	0
283870	LRRC75A	-4.33	1.21e-09	7.48e-08	7.13	2	0
3910	FMO5	-4.87	1.76e-09	1.04e-07	6.98	1	0
3932	PPP1R14C	-5.37	1.77e-09	1.05e-07	6.98	1	0
9500	CEACAM6	-6.47	6.74e-09	3.56e-07	6.45	1	0
134429	FOXA2	-7.18	7.9e-09	4.02e-07	6.4	5	0
1293	SLC9A3	-6.1	1.05e-08	5.21e-07	6.28	2	0
199675	LGSN	-5.83	1.23e-08	6.06e-07	6.22	1	0
933	FSIP2	-5.33	2.46e-08	1.13e-06	5.95	3	0
7837	MS4A1	-7.21	2.87e-08	1.3e-06	5.89	1	0
693144	AKR7L	-5.87	3.08e-08	1.4e-06	5.85	7	0
4935	LINC00261	-6.6	3.46e-08	1.55e-06	5.81	1	0
643155	CCL2	5.36	7.64e-08	3.12e-06	5.51	2	0
147965	TNFRSF25	-3.52	1.66e-07	6.14e-06	5.21	1	0
100506860	MFSD6L	-6.77	2.26e-07	8.1e-06	5.09	1	0
8534	FANK1	-3.35	4.75e-07	1.55e-05	4.81	3	0
2701	EPB41L4B	-4.61	4.92e-07	1.6e-05	4.8	2	0
5973	SAP25	-3.9	5.42e-07	1.75e-05	4.76	1	0
203	PLEK2	-4.71	5.77e-07	1.85e-05	4.73	1	0
7011	ASPG	-5.23	8.69e-07	2.67e-05	4.57	1	0
5337	SIGLEC6	-6.94	1.15e-06	3.45e-05	4.46	1	0
81553	MYO15B	-4.21	1.84e-06	5.27e-05	4.28	7	0
3725	RNF5	-8.91	1.94e-06	5.52e-05	4.26	1	0
4636	MICALCL	-3.84	2.02e-06	5.72e-05	4.24	1	0
881	SMPDL3B	-5.18	2.06e-06	5.82e-05	4.24	2	0
54751	NNMT	3.86	2.9e-06	7.97e-05	4.1	6	0
9833	SHH	-5.92	3.06e-06	8.36e-05	4.08	1	0
2028	COL3A1	4.23	3.1e-06	8.45e-05	4.07	2	0
642280	LEXM	-7.42	3.49e-06	9.38e-05	4.03	2	0
121506	B3GALT5-AS1	-4.96	3.57e-06	9.55e-05	4.02	4	0
729085	OTOP2	-5.61	4.14e-06	0.000109	3.96	2	0
2584	TERT	-6.83	4.18e-06	0.00011	3.96	4	0
100507002	BICDL1	-3.86	4.59e-06	0.000119	3.92	1	0
23760	RFX6	-7.22	4.9e-06	0.000126	3.9	1	0
9588	LMCD1	4.52	5.74e-06	0.000145	3.84	2	0
960	ANKRD36BP2	-5.35	5.85e-06	0.000147	3.83	3	0
144717	MNX1	-5.71	6.06e-06	0.000151	3.82	2	0
22795	GALR2	4.49	7.93e-06	0.000191	3.72	4	0
150786	LYPD8	-5.06	8.97e-06	0.000213	3.67	7	0
2305	PROC	-5.04	9.36e-06	0.000221	3.66	1	0
3430	EVX1	-6.3	1.35e-05	0.000304	3.52	8	0
9306	LDHD	-3.93	1.45e-05	0.000321	3.49	1	0
55723	ISL1	-4.62	1.7e-05	0.00037	3.43	9	0
51050	KIFC2	-3.5	1.89e-05	0.000407	3.39	1	0
25973	CXorf65	-6	1.95e-05	0.000418	3.38	3	0
85027	KLK3	-8.48	2.3e-05	0.000484	3.31	2	0
54863	RNF144B	2.42	2.42e-05	0.000505	3.3	5	0
2014	OTOP3	-8.55	2.45e-05	0.000509	3.29	3	0
55342	NEUROD1	-6.32	2.63e-05	0.000541	3.27	16	0
445	SLIT3-AS2	-5.72	2.64e-05	0.000542	3.27	1	0
64321	SLC2A3	4.62	2.79e-05	0.000569	3.24	1	0
8448	COL2A1	-6.24	2.85e-05	0.000581	3.24	3	0
1303	BDH1	-3.6	2.97e-05	0.000601	3.22	2	0
7390	FGF7	3.35	3.48e-05	0.000691	3.16	1	0
692198	KLK15	-6.07	3.64e-05	0.000716	3.14	1	0
5128	DOLPP1	-2.79	3.67e-05	0.000719	3.14	3	0
9849	CNNM2	-2.36	3.71e-05	0.000726	3.14	1	0
7043	PABPC1L	-2.41	4.02e-05	0.000779	3.11	1	0
439915	TBX1	-3.96	4.09e-05	0.00079	3.1	7	0
4885	ACOT11	-2.85	4.98e-05	0.000938	3.03	7	0
5331	ARHGAP20	1.91	6.66e-05	0.0012	2.92	1	0
51204	PLPP6	-2.4	6.87e-05	0.00123	2.91	1	0
50488	PRKCG	-4.41	6.99e-05	0.00125	2.9	1	0
55760	DGKQ	-2.52	7.46e-05	0.00132	2.88	1	0
57622	ICAM1	3.15	7.46e-05	0.00132	2.88	1	0
7051	ADAMTS12	3.2	7.63e-05	0.00134	2.87	8	0
403314	TRANK1	-2.48	8.06e-05	0.0014	2.85	2	0
1359	GRIN2B	-6.55	8.33e-05	0.00143	2.84	7	0
84898	RNF227	1.66	8.49e-05	0.00146	2.84	1	0
125206	ZNF708	-1.46	8.6e-05	0.00147	2.83	2	0
4796	PDCD4-AS1	-3.13	8.64e-05	0.00148	2.83	2	0
9209	ZNF701	-1.88	9.54e-05	0.00161	2.79	2	0
5874	WT1-AS	7	9.72e-05	0.00163	2.79	2	0
9377	IFITM3	2.49	0.000114865	0.00187	2.73	2	0
148709	FITM1	-3.29	0.000115822	0.00188	2.73	2	0
65258	MT1L	2.83	0.000118131	0.00191	2.72	1	0
125	SLC15A3	2.04	0.000124178	0.00199	2.7	4	0
3849	HIGD1A	-2.71	0.000125033	0.002	2.7	3	0
1237	POLQ	-4.19	0.000129743	0.00206	2.69	1	0
101928399	CLNK	-6.72	0.000134479	0.00213	2.67	1	0
125336	TXK	-4	0.000164697	0.00251	2.6	1	0
2907	ZNF675	-2.58	0.000167556	0.00254	2.6	1	0
677810	RAB44	-4.63	0.00016746	0.00254	2.6	3	0
8431	P4HA3	3.9	0.000168912	0.00256	2.59	5	0
401262	TTC6	-5.84	0.000188308	0.00282	2.55	1	0
80152	HTR2B	4.76	0.000196506	0.00292	2.53	1	0
55565	FLNB	-2.25	0.000205731	0.00304	2.52	1	0
90060	DRGX	-5.67	0.000220114	0.00323	2.49	2	0
64926	ARSI	4.04	0.000220535	0.00323	2.49	2	0
8412	FIBCD1	-3.68	0.000235782	0.00341	2.47	1	0
338645	CACNA1G	3.84	0.00023753	0.00343	2.46	1	0
203054	NIBAN3	-4.75	0.000238561	0.00344	2.46	1	0
827	ACOT8	-2.14	0.000245335	0.00352	2.45	1	0
80210	KIF18B	-4.66	0.00025368	0.00361	2.44	3	0
29780	ICAM4	3.92	0.000303541	0.00421	2.38	1	0
2827	ONECUT2	-4.01	0.000305523	0.00423	2.37	5	0
8140	IQGAP3	-4.13	0.00031178	0.00431	2.37	1	0
284371	TMEM200A	-3.91	0.000314848	0.00433	2.36	1	0
54039	FAM20C	2.63	0.000325731	0.00446	2.35	1	0
3009	PXDC1	2.74	0.000339163	0.00461	2.34	2	0
487	HOXD8	1.8	0.000351251	0.00473	2.32	10	0
80279	LATS2	1.81	0.00037445	0.00498	2.3	4	0
283431	ODF3L1	1.64	0.000413884	0.00539	2.27	1	0
27101	ZNF600	-2.15	0.000417732	0.00543	2.27	2	0
23436	TREM1	4.63	0.000431104	0.00557	2.25	4	0
199720	ANXA1	3.1	0.000433209	0.00558	2.25	1	0
26119	TNFAIP6	4.5	0.000464656	0.0059	2.23	2	0
644815	IGFBP4	2.3	0.000469489	0.00595	2.23	1	0
7091	FAP	3.79	0.000482561	0.00608	2.22	2	0
100133311	GLIPR1	2.25	0.000491142	0.00617	2.21	3	0
79159	C2CD2L	-2.4	0.000502213	0.00627	2.2	1	0
8449	COL5A2	2.85	0.000504676	0.00629	2.2	1	0
353088	CPT1B	-5.27	0.000514292	0.00638	2.2	6	0
93664	ASCL2	-2.66	0.000549275	0.00675	2.17	4	0
9508	HAGLR	-2.66	0.000566598	0.00693	2.16	1	0
8620	COL1A2	3.15	0.00056795	0.00693	2.16	8	0
25976	RRAD	2.38	0.00059109	0.00718	2.14	4	0
10435	TP53I3	-2.48	0.00060168	0.00726	2.14	1	0
23580	GFER	-1.6	0.000602156	0.00726	2.14	1	0
54862	PAX4	-6.49	0.000603281	0.00727	2.14	2	0
339229	ZNF763	-1.83	0.000611226	0.00734	2.13	1	0
374786	SPRED3	1.98	0.000625531	0.00748	2.13	2	0
57474	SEMA6B	3.38	0.000663294	0.00786	2.1	3	0
257240	KCNK1	-4.11	0.00067851	0.00801	2.1	1	0
440900	NUCB1	1.23	0.000679424	0.00802	2.1	1	0
3312	FGF5	6.6	0.000688447	0.00811	2.09	2	0
2678	ALDH4A1	2.9	0.000697091	0.00819	2.09	1	0
3560	FZD8	1.31	0.000708474	0.0083	2.08	1	0
4772	TMEM255A	2.93	0.000712966	0.00833	2.08	1	0
337876	TPST1	2.43	0.000732666	0.00849	2.07	2	0
79188	MAFB	3.17	0.000761728	0.00876	2.06	1	0
151176	ZNF726	-3.55	0.00076193	0.00876	2.06	3	0
348938	SIX2	5.56	0.000764757	0.00879	2.06	3	0
1063	PSD4	-3.48	0.000775536	0.0089	2.05	4	0
283643	CHMP2B	-1.62	0.000778266	0.00892	2.05	1	0
79890	PAFAH2	-2.06	0.000781807	0.00895	2.05	2	0
55655	ZNF43	-1.62	0.000784504	0.00897	2.05	1	0
2004	BHLHE41	-2.43	0.000817063	0.0093	2.03	2	0
55848	ADAMTS4	4.56	0.000843338	0.00953	2.02	1	0
25797	ZNF253	-1.43	0.000852999	0.00962	2.02	1	0
2326	SLC19A2	2.02	0.000869445	0.00978	2.01	1	0
64150	ISLR	2.77	0.000875177	0.00984	2.01	9	0
2820	ACSS3	2.58	0.00088568	0.00992	2	14	0
84331	TBPL2	-6.3	0.000915367	0.01	1.99	8	0
2734	SLC35B4	1.18	0.000961716	0.011	1.97	1	0
91584	QDPR	1.57	0.000996309	0.011	1.96	1	0
54810	FST	2.71	0.00099946	0.011	1.96	1	0
1289	TMOD4	-2.98	0.00104321	0.011	1.94	2	0
29969	FANCA	-2.77	0.00104547	0.011	1.94	1	0
3908	GRIK1	-2.53	0.00104921	0.011	1.94	13	0
2995	MIR23AHG	-1.36	0.00105595	0.011	1.94	1	0
3101	MAP3K8	2.4	0.00110623	0.012	1.92	3	0
64393	BTNL9	3.2	0.00115616	0.012	1.91	7	0
3607	LINC00570	-5.35	0.00117742	0.013	1.9	1	0
9641	MEIS1-AS3	2.91	0.00122969	0.013	1.89	1	0
5151	DGAT1	-2.07	0.00122977	0.013	1.89	3	0
7277	ZNF469	3.26	0.00123396	0.013	1.89	1	0
23613	MMP14	1.22	0.00125833	0.013	1.88	4	0
143458	ANXA5	2.05	0.00127689	0.013	1.88	1	0
374877	MAGIX	-2.24	0.00128091	0.013	1.87	1	0
283985	CPA1	4.91	0.00131963	0.014	1.87	3	0
3576	CACNA1A	-2.12	0.00132505	0.014	1.86	5	0
824	ADGRL4	3.47	0.0013284	0.014	1.86	5	0
283991	PCDH18	1.94	0.00137513	0.014	1.85	3	0
23362	SULT1C2	-3.49	0.00142896	0.015	1.84	1	0
6239	KRTAP5-9	-5.17	0.00144062	0.015	1.84	4	0
9980	EBF3	3.63	0.00150607	0.015	1.82	1	0
55064	UMODL1	-5.58	0.00150916	0.015	1.82	4	0
28959	SELENON	1.42	0.00157038	0.016	1.81	1	0
338	GLTP	-1.44	0.00157751	0.016	1.8	1	0
101927682	CAMK1	1.89	0.00165042	0.016	1.79	1	0
54414	NPHS1	-4.09	0.00164829	0.016	1.79	3	0
3768	ASB7	-1.4	0.00167378	0.016	1.79	1	0
85445	XXYLT1	0.96	0.00174593	0.017	1.77	2	0
340895	IL6ST	1.23	0.0018032	0.017	1.76	2	0
170679	COL5A3	2.05	0.00184566	0.018	1.75	1	0
4306	DYRK3	2.95	0.00187274	0.018	1.75	3	0
5733	CSF1	2.01	0.00187965	0.018	1.75	2	0
861	PDX1	-4.54	0.00188201	0.018	1.75	4	0
4534	RIMKLA	-3.03	0.00189927	0.018	1.75	2	0
3791	TUBE1	0.92	0.00190192	0.018	1.75	1	0
64866	MT2A	2.51	0.00190783	0.018	1.74	3	0
8837	FASTKD1	-1.79	0.00192613	0.018	1.74	1	0
63904	ASPN	2.55	0.00200954	0.019	1.73	2	0
92162	FUT5	-6.6	0.00207686	0.019	1.72	2	0
196792	CPLX3	-4.34	0.0020904	0.019	1.72	2	0
221584	SALL1	-4.07	0.00211246	0.019	1.71	10	0
93432	HOXA1	-1.47	0.00220092	0.02	1.7	3	0
8483	CLDN9	-2.6	0.00222465	0.02	1.69	3	0
54491	ZFP36L1	2.25	0.00223808	0.02	1.69	1	0
684	CDC45	-3.31	0.00226976	0.02	1.69	1	0
9133	LOC100506188	3.9	0.00229842	0.021	1.68	1	0
152	HTRA3	3.54	0.00234344	0.021	1.68	2	0
10885	MAP4K1	-2.91	0.00238867	0.021	1.67	6	0
63910	COL25A1	4.3	0.0024569	0.022	1.66	1	0
7517	RASA3	1.75	0.00246781	0.022	1.66	1	0
132720	GCSIR	-5.64	0.00248164	0.022	1.66	2	0
645638	CPT2	-1.9	0.00254332	0.022	1.65	5	0
23210	MIR25	-5.15	0.00254821	0.022	1.65	8	0
53917	PCSK9	-4.97	0.00258649	0.023	1.65	2	0
4929	SLC22A14	-3.23	0.00259047	0.023	1.65	1	0
400746	S100A12	4.39	0.00261376	0.023	1.64	1	0
3400	FSCN1	1.99	0.00262581	0.023	1.64	3	0
125058	PCDHB8	3.06	0.00266493	0.023	1.64	4	0
22839	SIRPG	-3.63	0.00274441	0.024	1.63	1	0
55388	A2M	1.73	0.00275865	0.024	1.63	4	0
3268	PPT1	1.79	0.00279907	0.024	1.62	1	0
8646	WNT10A	-3.33	0.00280701	0.024	1.62	2	0
57085	SH3RF1	-1.46	0.00284824	0.024	1.62	1	0
80381	NEXN-AS1	3.47	0.00292734	0.025	1.61	1	0
11016	PCDHGA10	1.58	0.00297335	0.025	1.6	3	0
58986	DHCR24	-2.62	0.00301457	0.025	1.6	1	0
57733	KCNAB3	-2.31	0.00303764	0.025	1.6	4	0
55930	BNIP3	2.36	0.00305352	0.026	1.59	3	0
8419	HMX3	3.42	0.0030757	0.026	1.59	3	0
55237	ST6GALNAC5	2.48	0.00307948	0.026	1.59	2	0
54881	FFAR4	-4.4	0.00308762	0.026	1.59	2	0
342132	QSOX1	-1.83	0.0030951	0.026	1.59	2	0
89849	MYH10	2.26	0.00315853	0.026	1.58	1	0
4644	HLA-J	-5.12	0.0032016	0.026	1.58	1	0
83478	LTF	-4.15	0.00324223	0.027	1.57	12	0
201294	IGFBP3	1.82	0.00329656	0.027	1.57	3	0
5832	KLHL21	1.97	0.00342355	0.028	1.56	4	0
55160	H3C6	-2.47	0.00343649	0.028	1.56	9	0
8522	TM4SF18	2.88	0.00354445	0.028	1.55	3	0
4804	YWHAG	1.3	0.00354987	0.028	1.55	5	0
51495	SLFN12	1.4	0.00355485	0.028	1.55	14	0
5866	SLC9A8	-1.5	0.00356163	0.028	1.55	1	0
401563	FAM183A	-5.81	0.00356053	0.028	1.55	1	0
92369	LIG1	-1.41	0.00356106	0.028	1.55	1	0
2568	TPBGL	2.28	0.00358066	0.029	1.54	1	0
283420	SPNS3	-3.22	0.00359802	0.029	1.54	2	0
60481	ENG	2.53	0.00362299	0.029	1.54	1	0
64423	INCA1	-1.86	0.00366304	0.029	1.54	1	0
58504	ASPH	1.56	0.00381412	0.03	1.52	1	0
5739	LAMA4	2.24	0.00382291	0.03	1.52	4	0
4651	COL6A3	2.56	0.00387537	0.03	1.52	4	0
5467	GPR143	-2.59	0.00392223	0.031	1.51	1	0
84187	FAM98C	-1.25	0.0039445	0.031	1.51	1	0
401399	RENBP	1.87	0.00399997	0.031	1.51	2	0
8462	AK1	-2.17	0.00400721	0.031	1.51	3	0
163589	ZNF876P	1.6	0.00413211	0.032	1.5	4	0
55837	PITPNB	1.1	0.00420823	0.032	1.49	1	0
730	NID2	1.49	0.00426717	0.033	1.49	5	0
100144604	SOX17	3.63	0.00440011	0.033	1.48	4	0
10461	TGFB3	1.37	0.00441465	0.033	1.48	4	0
154661	NPTX2	2.84	0.00443465	0.034	1.47	5	0
257019	PLCB3	-1.76	0.00444688	0.034	1.47	1	0
6813	TGM1	-2	0.00451361	0.034	1.47	3	0
6513	PLXDC2	1.99	0.00452425	0.034	1.47	2	0
84102	SLC5A10	-5.34	0.00452551	0.034	1.47	3	0
5909	COX5A	-1.68	0.00459156	0.034	1.46	1	0
27287	CRIP3	-3.56	0.00466448	0.035	1.46	7	0
100133991	RASAL3	-2.55	0.00471012	0.035	1.46	1	0
284418	LUZP2	-2.49	0.00472419	0.035	1.45	6	0
79888	ADCK5	-1.79	0.00474542	0.035	1.45	1	0
3753	SLC7A5	2.46	0.0048227	0.036	1.45	3	0
79144	ZNF841	-1.15	0.00482651	0.036	1.45	1	0
10381	H1-5	-4.68	0.00484088	0.036	1.45	1	0
169841	CACYBP	0.89	0.00487828	0.036	1.44	5	0
64065	ZNF429	-0.97	0.00502022	0.037	1.43	1	0
9296	ADAMTS3	2.82	0.00503779	0.037	1.43	1	0
56063	CDC42EP2	2.5	0.00505373	0.037	1.43	2	0
22936	CDC42EP4	0.98	0.00506328	0.037	1.43	4	0
406983	CC2D1A	-1.38	0.00506913	0.037	1.43	1	0
1066	KLHL34	-2.38	0.00509339	0.037	1.43	4	0
55711	RIN3	1.36	0.00524272	0.038	1.42	1	0
6196	ELK3	1.7	0.00526397	0.038	1.42	3	0
399665	QPCT	2.13	0.00526637	0.038	1.42	1	0
1769	GLG1	0.58	0.00535435	0.038	1.42	1	0
83861	LAMA2	2.28	0.00538556	0.039	1.41	4	0
1212	FOXK2	1.01	0.00547819	0.039	1.41	5	0
445815	CD81-AS1	2.76	0.00565301	0.04	1.4	1	0
54977	KDR	2.69	0.00582796	0.041	1.39	10	0
4692	CDCP1	-3.23	0.0058652	0.041	1.39	1	0
54499	TMEM88	1.85	0.00587162	0.041	1.39	8	0
5957	ZSCAN12P1	-2.29	0.00590221	0.041	1.38	6	0
9890	BST2	1.96	0.00592883	0.041	1.38	6	0
126306	ADRA2C	2.18	0.00595692	0.042	1.38	3	0
117248	JMJD6	1.01	0.00608005	0.042	1.37	1	0
64285	AGTRAP	1.39	0.00631371	0.044	1.36	5	0
1880	VRTN	-6.51	0.00645432	0.044	1.35	6	0
6790	ZNF774	-2.25	0.00651602	0.045	1.35	1	0
647024	CLEC9A	-2.7	0.00662215	0.045	1.35	3	0
1410	PTGIR	1.83	0.00669642	0.045	1.34	3	0
2766	KLF11	1.88	0.00674217	0.046	1.34	9	0
54898	MERTK	1.73	0.00678278	0.046	1.34	1	0
22808	STXBP2	-2.93	0.00681455	0.046	1.34	2	0
54988	TMCO1	-1.87	0.00722071	0.048	1.32	2	0
23171	CRYAB	2.75	0.00741034	0.049	1.31	7	0
154	ELOVL2	2.72	0.00747709	0.049	1.31	4	0
7076	ACSM5	2.98	0.00754227	0.049	1.31	1	0
3655	ADRB2	1.65	0.00755335	0.049	1.31	2	0
