# Supplementary material for: Epigenome-Wide Study Identifies Epigenetic Outliers in Normal Mucosa of Patients with Colorectal Cancer
Source: Oxford University Press journal article supplement (doi:10.1158/1940-6207.capr-22-0258), 2022-08-25
Supplement: capr-22-0258_supplementary_table_4_suppst4.xlsx [file capr-22-0258_supplementary_table_4_suppst4.xlsx]

## Sheet: Sheet1
Supplementary Table 4: Gene Ontology Analysis of Top 30 differentially expressed genes (Total of 775 Processes)
Accession	GO Term	Category Size	Overlap	Odds Ratio	P-value
GO:0051674	localization of cell	1763	242	1.67	2.5e-11
GO:0006928	movement of cell or subcellular component	1626	222	1.68	9.87e-11
GO:0006805	xenobiotic metabolic process	116	35	4.35	1.17e-10
GO:0032528	microvillus organization	25	15	15	3.41e-10
GO:0007166	cell surface receptor signaling pathway	2257	283	1.55	7.59e-10
GO:0009410	response to xenobiotic stimulus	128	35	3.79	2.24e-09
GO:0044281	small molecule metabolic process	978	142	1.8	3.83e-09
GO:0032879	regulation of localization	2872	345	1.44	1.47e-08
GO:0015711	organic anion transport	508	85	2.05	2.7e-08
GO:0016266	O-glycan processing	60	21	5.39	3.37e-08
GO:0051234	establishment of localization	5230	572	1.33	1.3e-07
GO:0050900	leukocyte migration	205	42	2.64	3.51e-07
GO:0015849	organic acid transport	352	62	2.16	3.83e-07
GO:0040011	locomotion	922	127	1.68	4.17e-07
GO:0065009	regulation of molecular function	3076	356	1.38	4.55e-07
GO:0044255	cellular lipid metabolic process	830	118	1.71	4.57e-07
GO:0006955	immune response	2022	246	1.44	1.04e-06
GO:0009888	tissue development	1775	217	1.46	1.3e-06
GO:0017144	drug metabolic process	46	16	5.33	1.59e-06
GO:0030198	extracellular matrix organization	218	42	2.45	1.79e-06
GO:0045785	positive regulation of cell adhesion	428	69	1.94	2.46e-06
GO:0002685	regulation of leukocyte migration	212	41	2.41	3.31e-06
GO:0006811	ion transport	283	49	2.19	4.2e-06
GO:0030029	actin filament-based process	806	112	1.64	4.65e-06
GO:0051046	regulation of secretion	701	100	1.69	4.92e-06
GO:0030277	maintenance of gastrointestinal epithelium	21	10	9.06	5.56e-06
GO:0010646	regulation of cell communication	3625	402	1.31	6.32e-06
GO:0016042	lipid catabolic process	343	57	2.01	7.17e-06
GO:0007586	digestion	141	30	2.71	9.64e-06
GO:0042330	taxis	657	93	1.67	1.44e-05
GO:0010817	regulation of hormone levels	301	50	2.03	1.92e-05
GO:0023051	regulation of signaling	2185	250	1.37	2.07e-05
GO:0050801	ion homeostasis	824	111	1.58	2.07e-05
GO:0022407	regulation of cell-cell adhesion	439	67	1.82	2.18e-05
GO:0050427	3'-phosphoadenosine 5'-phosphosulfate metabolic process	24	10	7.12	2.39e-05
GO:2000145	regulation of cell motility	1057	136	1.5	2.52e-05
GO:0042127	regulation of cell population proliferation	1764	210	1.39	2.92e-05
GO:0060326	cell chemotaxis	311	51	1.97	3.07e-05
GO:0120254	olefinic compound metabolic process	121	26	2.74	3.08e-05
GO:0034220	ion transmembrane transport	299	49	2	3.1e-05
GO:0065008	regulation of biological quality	2871	306	1.32	3.37e-05
GO:0001990	regulation of systemic arterial blood pressure by hormone	40	13	4.8	3.46e-05
GO:0043067	regulation of programmed cell death	1612	193	1.39	4.57e-05
GO:0043085	positive regulation of catalytic activity	1470	178	1.41	4.98e-05
GO:0042445	hormone metabolic process	221	39	2.15	5.05e-05
GO:0023052	signaling	2461	262	1.34	5.09e-05
GO:0007010	cytoskeleton organization	1398	170	1.41	5.93e-05
GO:0002793	positive regulation of peptide secretion	193	35	2.22	6.8e-05
GO:0001676	long-chain fatty acid metabolic process	113	24	2.7	7.46e-05
GO:0008610	lipid biosynthetic process	731	98	1.57	7.55e-05
GO:0007154	cell communication	2519	267	1.33	8.55e-05
GO:0008643	carbohydrate transport	151	29	2.38	9.78e-05
GO:0043616	keratinocyte proliferation	50	14	3.88	0.00011
GO:0019637	organophosphate metabolic process	1054	132	1.46	0.000115
GO:0071310	cellular response to organic substance	2751	305	1.29	0.000118
GO:0050854	regulation of antigen receptor-mediated signaling pathway	69	17	3.26	0.000123
GO:1902531	regulation of intracellular signal transduction	1866	216	1.34	0.000125
GO:0018149	peptide cross-linking	34	11	4.77	0.000145
GO:0042908	xenobiotic transport	34	11	4.77	0.000145
GO:1901615	organic hydroxy compound metabolic process	513	72	1.65	0.00015
GO:0001894	tissue homeostasis	257	42	1.96	0.00016
GO:0042738	exogenous drug catabolic process	24	9	5.98	0.000163
GO:0050896	response to stimulus	290	41	1.98	0.000168
GO:0006869	lipid transport	384	57	1.76	0.000173
GO:0007169	transmembrane receptor protein tyrosine kinase signaling pathway	750	98	1.52	0.000196
GO:0002694	regulation of leukocyte activation	534	74	1.62	0.000206
GO:0097530	granulocyte migration	150	28	2.3	0.000211
GO:0019373	epoxygenase P450 pathway	20	8	6.64	0.000225
GO:0052547	regulation of peptidase activity	465	66	1.67	0.000226
GO:0042110	T cell activation	483	68	1.65	0.000232
GO:0009100	glycoprotein metabolic process	414	60	1.71	0.000245
GO:0098609	cell-cell adhesion	413	59	1.71	0.000245
GO:0030003	cellular cation homeostasis	664	88	1.54	0.000256
GO:0019722	calcium-mediated signaling	222	37	2.01	0.000258
GO:0034308	primary alcohol metabolic process	94	20	2.7	0.000281
GO:1901264	carbohydrate derivative transport	94	20	2.7	0.000281
GO:0009605	response to external stimulus	2208	243	1.3	0.000293
GO:0010951	negative regulation of endopeptidase activity	257	41	1.9	0.000321
GO:0008360	regulation of cell shape	154	28	2.23	0.000327
GO:0001954	positive regulation of cell-matrix adhesion	55	14	3.41	0.000331
GO:0030199	collagen fibril organization	55	14	3.41	0.000331
GO:0015804	neutral amino acid transport	43	12	3.86	0.000349
GO:0035556	intracellular signal transduction	818	101	1.48	0.000352
GO:0034097	response to cytokine	1127	136	1.4	0.000354
GO:0043436	oxoacid metabolic process	1135	137	1.4	0.000355
GO:0008217	regulation of blood pressure	140	26	2.29	0.00036
GO:0045861	negative regulation of proteolysis	368	54	1.73	0.00036
GO:0008210	estrogen metabolic process	32	10	4.53	0.000398
GO:0072507	divalent inorganic cation homeostasis	510	70	1.6	0.000398
GO:0090087	regulation of peptide transport	664	87	1.52	0.000403
GO:0001889	liver development	126	24	2.36	0.000413
GO:0085029	extracellular matrix assembly	44	12	3.74	0.00044
GO:0043547	positive regulation of GTPase activity	406	58	1.68	0.000447
GO:0032940	secretion by cell	521	70	1.59	0.000464
GO:0055082	cellular chemical homeostasis	825	104	1.46	0.000476
GO:0045682	regulation of epidermis development	91	19	2.63	0.000506
GO:0051050	positive regulation of transport	921	114	1.43	0.000519
GO:0031018	endocrine pancreas development	45	12	3.62	0.000551
GO:0031638	zymogen activation	58	14	3.17	0.000595
GO:0060548	negative regulation of cell death	1030	125	1.4	0.00062
GO:0006950	response to stress	4066	426	1.21	0.000639
GO:0055065	metal ion homeostasis	656	85	1.5	0.000663
GO:0006883	cellular sodium ion homeostasis	18	7	6.33	0.000687
GO:0050708	regulation of protein secretion	352	51	1.7	0.000694
GO:0033875	ribonucleoside bisphosphate metabolic process	138	25	2.21	0.000713
GO:0034032	purine nucleoside bisphosphate metabolic process	138	25	2.21	0.000713
GO:0060491	regulation of cell projection assembly	185	31	2.01	0.000713
GO:0044344	cellular response to fibroblast growth factor stimulus	146	26	2.17	0.000737
GO:0046903	secretion	90	18	2.59	0.000808
GO:0042634	regulation of hair cycle	29	9	4.48	0.000819
GO:0007275	multicellular organism development	4467	455	1.21	0.000821
GO:0006796	phosphate-containing compound metabolic process	1469	166	1.33	0.000824
GO:0043588	skin development	425	59	1.62	0.000829
GO:0051336	regulation of hydrolase activity	642	82	1.5	0.00083
GO:0033559	unsaturated fatty acid metabolic process	117	22	2.31	0.00087
GO:0070838	divalent metal ion transport	471	64	1.58	0.000898
GO:0051239	regulation of multicellular organismal process	3285	346	1.23	0.000901
GO:0070098	chemokine-mediated signaling pathway	88	18	2.57	0.000907
GO:0070661	leukocyte proliferation	313	46	1.73	0.000915
GO:0032944	regulation of mononuclear cell proliferation	221	35	1.88	0.000968
GO:0043410	positive regulation of MAPK cascade	554	73	1.53	0.000975
GO:0015718	monocarboxylic acid transport	165	28	2.05	0.000993
GO:0001991	regulation of systemic arterial blood pressure by circulatory renin-angiotensin	19	7	5.8	0.001
GO:0051716	cellular response to stimulus	4188	409	1.22	0.00101
GO:0043065	positive regulation of apoptotic process	684	87	1.47	0.00102
GO:0098739	import across plasma membrane	157	27	2.08	0.00102
GO:0030855	epithelial cell differentiation	210	33	1.91	0.00104
GO:0010562	positive regulation of phosphorus metabolic process	1180	139	1.35	0.00107
GO:0034330	cell junction organization	713	90	1.46	0.00107
GO:0007267	cell-cell signaling	1761	198	1.29	0.00109
GO:0035725	sodium ion transmembrane transport	158	27	2.07	0.00109
GO:2000659	regulation of interleukin-1-mediated signaling pathway	10	5	9.94	0.00109
GO:0046879	hormone secretion	183	30	1.97	0.00112
GO:1990868	response to chemokine	97	19	2.43	0.00115
GO:0007043	cell-cell junction assembly	143	25	2.12	0.00119
GO:0033077	T cell differentiation in thymus	76	16	2.66	0.00124
GO:0006654	phosphatidic acid biosynthetic process	49	12	3.23	0.00125
GO:0072348	sulfur compound transport	49	12	3.23	0.00125
GO:0045109	intermediate filament organization	25	8	4.68	0.00127
GO:0070268	cornification	113	21	2.28	0.00132
GO:0051707	response to other organism	1481	169	1.31	0.00135
GO:0007605	sensory perception of sound	152	26	2.06	0.00136
GO:0044262	cellular carbohydrate metabolic process	293	43	1.72	0.00136
GO:0010810	regulation of cell-substrate adhesion	217	34	1.86	0.00137
GO:0048869	cellular developmental process	4327	445	1.2	0.00137
GO:0002675	positive regulation of acute inflammatory response	31	9	4.07	0.00139
GO:0002544	chronic inflammatory response	20	7	5.36	0.00142
GO:0002689	negative regulation of leukocyte chemotaxis	20	7	5.36	0.00142
GO:0009404	toxin metabolic process	15	6	6.63	0.00142
GO:0046635	positive regulation of alpha-beta T cell activation	63	14	2.85	0.00142
GO:0050862	positive regulation of T cell receptor signaling pathway	15	6	6.63	0.00142
GO:0070887	cellular response to chemical stimulus	504	64	1.54	0.00149
GO:0007264	small GTPase mediated signal transduction	508	67	1.53	0.00151
GO:1903039	positive regulation of leukocyte cell-cell adhesion	235	36	1.81	0.00151
GO:0006954	inflammatory response	369	51	1.63	0.00152
GO:0009607	response to biotic stimulus	1515	172	1.3	0.00153
GO:0006690	icosanoid metabolic process	122	22	2.2	0.00154
GO:0007204	positive regulation of cytosolic calcium ion concentration	321	46	1.68	0.00155
GO:0048584	positive regulation of response to stimulus	662	82	1.46	0.00156
GO:0019221	cytokine-mediated signaling pathway	717	89	1.44	0.00158
GO:0048646	anatomical structure formation involved in morphogenesis	1202	140	1.33	0.0016
GO:0090276	regulation of peptide hormone secretion	203	32	1.88	0.00164
GO:1903053	regulation of extracellular matrix organization	44	11	3.32	0.00165
GO:0046637	regulation of alpha-beta T cell differentiation	64	14	2.79	0.00167
GO:0070633	transepithelial transport	26	8	4.42	0.00169
GO:0006812	cation transport	1175	137	1.34	0.00172
GO:0023014	signal transduction by protein phosphorylation	953	114	1.37	0.00175
GO:0003013	circulatory system process	576	74	1.48	0.0018
GO:0010942	positive regulation of cell death	745	92	1.42	0.00186
GO:0007492	endoderm development	79	16	2.53	0.0019
GO:0060713	labyrinthine layer morphogenesis	21	7	4.97	0.00196
GO:0016477	cell migration	488	62	1.53	0.00201
GO:0048585	negative regulation of response to stimulus	1754	195	1.27	0.00202
GO:0009967	positive regulation of signal transduction	1687	188	1.27	0.00219
GO:1905039	carboxylic acid transmembrane transport	149	25	2.01	0.00219
GO:0046651	lymphocyte proliferation	283	41	1.7	0.00221
GO:0072539	T-helper 17 cell differentiation	27	8	4.19	0.00221
GO:0050727	regulation of inflammatory response	425	57	1.55	0.00224
GO:0042573	retinoic acid metabolic process	33	9	3.73	0.00226
GO:0006887	exocytosis	913	109	1.37	0.00234
GO:0030593	neutrophil chemotaxis	103	19	2.26	0.00238
GO:0050818	regulation of coagulation	88	17	2.39	0.00238
GO:0035987	endodermal cell differentiation	46	11	3.13	0.00243
GO:0008283	cell population proliferation	224	33	1.8	0.00251
GO:0035295	tube development	1148	133	1.32	0.00252
GO:0032964	collagen biosynthetic process	53	12	2.92	0.00257
GO:0042129	regulation of T cell proliferation	167	27	1.93	0.00258
GO:0006874	cellular calcium ion homeostasis	455	60	1.52	0.00259
GO:0006486	protein glycosylation	251	37	1.73	0.00261
GO:0055067	monovalent inorganic cation homeostasis	159	26	1.95	0.00261
GO:0009913	epidermal cell differentiation	365	50	1.59	0.00262
GO:0016053	organic acid biosynthetic process	365	50	1.59	0.00262
GO:0015748	organophosphate ester transport	135	23	2.05	0.00263
GO:0050892	intestinal absorption	40	10	3.32	0.00266
GO:0042476	odontogenesis	34	9	3.6	0.00272
GO:0002684	positive regulation of immune system process	996	117	1.34	0.00285
GO:0035710	CD4-positive, alpha-beta T cell activation	97	18	2.27	0.00286
GO:0062013	positive regulation of small molecule metabolic process	152	25	1.97	0.00288
GO:1903115	regulation of actin filament-based movement	47	11	3.04	0.00291
GO:0002003	angiotensin maturation	12	5	7.1	0.00293
GO:0002024	diet induced thermogenesis	12	5	7.1	0.00293
GO:0003334	keratinocyte development	12	5	7.1	0.00293
GO:0031581	hemidesmosome assembly	12	5	7.1	0.00293
GO:0070857	regulation of bile acid biosynthetic process	12	5	7.1	0.00293
GO:1903961	positive regulation of anion transmembrane transport	12	5	7.1	0.00293
GO:0009312	oligosaccharide biosynthetic process	17	6	5.42	0.00299
GO:0031649	heat generation	17	6	5.42	0.00299
GO:0045986	negative regulation of smooth muscle contraction	17	6	5.42	0.00299
GO:0048878	chemical homeostasis	250	36	1.73	0.00301
GO:0009719	response to endogenous stimulus	1660	184	1.26	0.00307
GO:0061448	connective tissue development	262	38	1.7	0.00307
GO:0030098	lymphocyte differentiation	187	29	1.85	0.00312
GO:0072330	monocarboxylic acid biosynthetic process	245	36	1.72	0.00312
GO:0002065	columnar/cuboidal epithelial cell differentiation	121	21	2.1	0.00314
GO:0038083	peptidyl-tyrosine autophosphorylation	41	10	3.21	0.00323
GO:1900046	regulation of hemostasis	83	16	2.38	0.00323
GO:0043066	negative regulation of apoptotic process	830	99	1.37	0.00328
GO:0042327	positive regulation of phosphorylation	1108	128	1.32	0.00333
GO:0050920	regulation of chemotaxis	229	34	1.74	0.00338
GO:0019220	regulation of phosphate metabolic process	1865	204	1.25	0.00339
GO:0008206	bile acid metabolic process	48	11	2.96	0.00347
GO:0048871	multicellular organismal homeostasis	258	37	1.7	0.00347
GO:0016338	calcium-independent cell-cell adhesion via plasma membrane cell-adhesion molecules	23	7	4.35	0.00352
GO:0002294	CD4-positive, alpha-beta T cell differentiation involved in immune response	62	13	2.64	0.00357
GO:0009636	response to toxic substance	247	36	1.71	0.00357
GO:0001501	skeletal system development	517	66	1.47	0.00359
GO:0006665	sphingolipid metabolic process	163	26	1.9	0.0037
GO:2000116	regulation of cysteine-type endopeptidase activity	239	35	1.72	0.00373
GO:0051261	protein depolymerization	115	20	2.1	0.00379
GO:0070252	actin-mediated cell contraction	123	21	2.05	0.00384
GO:0019751	polyol metabolic process	131	22	2.01	0.00385
GO:0046887	positive regulation of hormone secretion	131	22	2.01	0.00385
GO:0030155	regulation of cell adhesion	43	10	3.11	0.00386
GO:0050878	regulation of body fluid levels	429	56	1.51	0.00394
GO:0007162	negative regulation of cell adhesion	301	42	1.62	0.00395
GO:0009395	phospholipid catabolic process	49	11	2.88	0.00411
GO:0002287	alpha-beta T cell activation involved in immune response	63	13	2.59	0.00413
GO:0036148	phosphatidylglycerol acyl-chain remodeling	18	6	4.97	0.00414
GO:0046885	regulation of hormone biosynthetic process	18	6	4.97	0.00414
GO:0051923	sulfation	18	6	4.97	0.00414
GO:0045619	regulation of lymphocyte differentiation	181	28	1.83	0.00415
GO:0007155	cell adhesion	334	44	1.6	0.00419
GO:0007266	Rho protein signal transduction	140	23	1.96	0.00421
GO:0045622	regulation of T-helper cell differentiation	36	9	3.32	0.00429
GO:0009653	anatomical structure morphogenesis	811	94	1.37	0.0043
GO:0051591	response to cAMP	93	17	2.23	0.00434
GO:0019627	urea metabolic process	13	5	6.21	0.00441
GO:0001708	cell fate specification	101	18	2.16	0.00449
GO:0042632	cholesterol homeostasis	101	18	2.16	0.00449
GO:0043372	positive regulation of CD4-positive, alpha-beta T cell differentiation	30	8	3.62	0.00456
GO:0030879	mammary gland development	141	23	1.95	0.0046
GO:0072676	lymphocyte migration	117	20	2.06	0.00464
GO:0006919	activation of cysteine-type endopeptidase activity involved in apoptotic process	86	16	2.28	0.00465
GO:0030195	negative regulation of blood coagulation	50	11	2.81	0.00484
GO:0002064	epithelial cell development	209	31	1.74	0.00488
GO:0001932	regulation of protein phosphorylation	1499	166	1.26	0.00503
GO:0045321	leukocyte activation	716	85	1.38	0.00521
GO:0061041	regulation of wound healing	151	24	1.89	0.00539
GO:0051272	positive regulation of cellular component movement	611	75	1.41	0.00542
GO:0051346	negative regulation of hydrolase activity	471	60	1.46	0.00556
GO:0042303	molting cycle	111	19	2.06	0.00561
GO:0035592	establishment of protein localization to extracellular region	462	59	1.47	0.00563
GO:0019318	hexose metabolic process	254	36	1.65	0.00564
GO:0006793	phosphorus metabolic process	26	7	3.86	0.0057
GO:0046578	regulation of Ras protein signal transduction	194	29	1.76	0.00585
GO:0003071	renal system process involved in regulation of systemic arterial blood pressure	25	7	3.87	0.00587
GO:0046339	diacylglycerol metabolic process	25	7	3.87	0.00587
GO:0098660	inorganic ion transmembrane transport	863	101	1.33	0.00595
GO:0006720	isoprenoid metabolic process	144	23	1.9	0.00598
GO:0002690	positive regulation of leukocyte chemotaxis	96	17	2.15	0.00604
GO:0070085	glycosylation	264	37	1.63	0.00608
GO:0007159	leukocyte cell-cell adhesion	129	21	1.96	0.00611
GO:0030335	positive regulation of cell migration	567	70	1.41	0.00617
GO:0045217	cell-cell junction maintenance	14	5	5.52	0.00635
GO:0046462	monoacylglycerol metabolic process	14	5	5.52	0.00635
GO:0000902	cell morphogenesis	1041	119	1.3	0.00636
GO:0045834	positive regulation of lipid metabolic process	153	24	1.86	0.00636
GO:0061138	morphogenesis of a branching epithelium	187	28	1.76	0.00653
GO:0043090	amino acid import	45	10	2.84	0.00657
GO:0022617	extracellular matrix disassembly	74	14	2.33	0.00661
GO:0043549	regulation of kinase activity	915	106	1.32	0.00662
GO:0006638	neutral lipid metabolic process	137	22	1.91	0.00663
GO:0042060	wound healing	385	50	1.5	0.00668
GO:0032024	positive regulation of insulin secretion	74	14	2.32	0.00672
GO:0040017	positive regulation of locomotion	607	74	1.39	0.00672
GO:0046503	glycerolipid catabolic process	74	14	2.32	0.00672
GO:0031532	actin cytoskeleton reorganization	105	18	2.06	0.0068
GO:0042542	response to hydrogen peroxide	146	23	1.87	0.00707
GO:0120193	tight junction organization	82	15	2.23	0.00707
GO:0002764	immune response-regulating signaling pathway	403	52	1.48	0.00734
GO:0023019	signal transduction involved in regulation of gene expression	20	6	4.26	0.00737
GO:0060706	cell differentiation involved in embryonic placenta development	26	7	3.66	0.0074
GO:0019229	regulation of vasoconstriction	60	12	2.49	0.00744
GO:0097755	positive regulation of blood vessel diameter	60	12	2.49	0.00744
GO:0016101	diterpenoid metabolic process	114	19	1.99	0.00751
GO:0006656	phosphatidylcholine biosynthetic process	39	9	2.99	0.00752
GO:0015909	long-chain fatty acid transport	75	14	2.29	0.00758
GO:0002429	immune response-activating cell surface receptor signaling pathway	367	48	1.51	0.0076
GO:0001568	blood vessel development	793	93	1.34	0.00765
GO:0048513	animal organ development	2338	241	1.2	0.00783
GO:0019218	regulation of steroid metabolic process	131	21	1.9	0.00803
GO:0018108	peptidyl-tyrosine phosphorylation	333	44	1.53	0.0081
GO:0042475	odontogenesis of dentin-containing tooth	91	16	2.13	0.00813
GO:0006937	regulation of muscle contraction	173	26	1.77	0.00815
GO:0007015	actin filament organization	433	55	1.46	0.00815
GO:0006023	aminoglycan biosynthetic process	115	19	1.97	0.00824
GO:0044282	small molecule catabolic process	452	57	1.45	0.00829
GO:1901700	response to oxygen-containing compound	1619	175	1.23	0.00845
GO:0044319	wound healing, spreading of cells	33	8	3.18	0.00846
GO:1902745	positive regulation of lamellipodium organization	33	8	3.18	0.00846
GO:0043954	cellular component maintenance	61	12	2.44	0.00851
GO:0023057	negative regulation of signaling	1480	162	1.24	0.00852
GO:0001667	ameboidal-type cell migration	481	60	1.43	0.00863
GO:0036376	sodium ion export across plasma membrane	15	5	4.97	0.00881
GO:0045198	establishment of epithelial cell apical/basal polarity	15	5	4.97	0.00881
GO:0070365	hepatocyte differentiation	15	5	4.97	0.00881
GO:1900029	positive regulation of ruffle assembly	15	5	4.97	0.00881
GO:0030834	regulation of actin filament depolymerization	54	11	2.55	0.00885
GO:0022612	gland morphogenesis	124	20	1.92	0.00891
GO:0040036	regulation of fibroblast growth factor receptor signaling pathway	40	9	2.89	0.00894
GO:0046636	negative regulation of alpha-beta T cell activation	40	9	2.89	0.00894
GO:1902895	positive regulation of pri-miRNA transcription by RNA polymerase II	40	9	2.89	0.00894
GO:0045776	negative regulation of blood pressure	47	10	2.69	0.00902
GO:0051924	regulation of calcium ion transport	253	35	1.6	0.00909
GO:0003044	regulation of systemic arterial blood pressure mediated by a chemical signal	10	4	6.66	0.0092
GO:0042481	regulation of odontogenesis	27	7	3.48	0.00922
GO:0072337	modified amino acid transport	27	7	3.48	0.00922
GO:1900078	positive regulation of cellular response to insulin stimulus	27	7	3.48	0.00922
GO:0019374	galactolipid metabolic process	10	4	6.62	0.00939
GO:0031284	positive regulation of guanylate cyclase activity	10	4	6.62	0.00939
GO:0035524	proline transmembrane transport	10	4	6.62	0.00939
GO:0070092	regulation of glucagon secretion	10	4	6.62	0.00939
GO:0070314	G1 to G0 transition	10	4	6.62	0.00939
GO:2001225	regulation of chloride transport	10	4	6.62	0.00939
GO:0002115	store-operated calcium entry	21	6	3.98	0.00953
GO:0016540	protein autoprocessing	21	6	3.98	0.00953
GO:0043371	negative regulation of CD4-positive, alpha-beta T cell differentiation	21	6	3.98	0.00953
GO:0061162	establishment of monopolar cell polarity	21	6	3.98	0.00953
GO:0090280	positive regulation of calcium ion import	21	6	3.98	0.00953
GO:0070830	bicellular tight junction assembly	77	14	2.21	0.00957
GO:0048534	hematopoietic or lymphoid organ development	967	110	1.29	0.00977
GO:0055086	nucleobase-containing small molecule metabolic process	617	74	1.37	0.00981
GO:0043154	negative regulation of cysteine-type endopeptidase activity involved in apoptotic process	85	15	2.13	0.00985
GO:0042102	positive regulation of T cell proliferation	101	17	2.02	0.01
GO:0010648	negative regulation of cell communication	1477	161	1.24	0.0101
GO:0000083	regulation of transcription involved in G1/S transition of mitotic cell cycle	34	8	3.06	0.0102
GO:0001881	receptor recycling	34	8	3.06	0.0102
GO:0090504	epiboly	34	8	3.06	0.0102
GO:0031098	stress-activated protein kinase signaling cascade	300	40	1.54	0.0103
GO:0002251	organ or tissue specific immune response	41	9	2.8	0.0105
GO:0001525	angiogenesis	610	73	1.36	0.0108
GO:0034219	carbohydrate transmembrane transport	118	19	1.91	0.0108
GO:0070201	regulation of establishment of protein localization	658	78	1.35	0.0108
GO:0035296	regulation of tube diameter	143	22	1.81	0.0109
GO:0048565	digestive tract development	135	21	1.84	0.0112
GO:0098655	cation transmembrane transport	875	100	1.3	0.0112
GO:0002335	mature B cell differentiation	28	7	3.31	0.0113
GO:0002360	T cell lineage commitment	28	7	3.31	0.0113
GO:0018146	keratan sulfate biosynthetic process	28	7	3.31	0.0113
GO:0034612	response to tumor necrosis factor	320	42	1.51	0.0113
GO:0045859	regulation of protein kinase activity	805	93	1.31	0.0113
GO:1901617	organic hydroxy compound biosynthetic process	257	35	1.58	0.0115
GO:0002292	T cell differentiation involved in immune response	71	13	2.23	0.0116
GO:0005996	monosaccharide metabolic process	42	9	2.74	0.0118
GO:0035150	regulation of tube size	144	22	1.8	0.0118
GO:0009812	flavonoid metabolic process	16	5	4.52	0.0119
GO:0002067	glandular epithelial cell differentiation	49	10	2.55	0.0121
GO:0002313	mature B cell differentiation involved in immune response	22	6	3.73	0.0121
GO:0006067	ethanol metabolic process	22	6	3.73	0.0121
GO:0043369	CD4-positive or CD8-positive, alpha-beta T cell lineage commitment	22	6	3.73	0.0121
GO:0044342	type B pancreatic cell proliferation	22	6	3.73	0.0121
GO:0045058	T cell selection	49	10	2.55	0.0121
GO:0045624	positive regulation of T-helper cell differentiation	22	6	3.73	0.0121
GO:0006753	nucleoside phosphate metabolic process	537	65	1.38	0.0123
GO:0048246	macrophage chemotaxis	42	9	2.71	0.0124
GO:0050853	B cell receptor signaling pathway	64	12	2.3	0.0125
GO:0051403	stress-activated MAPK cascade	286	38	1.53	0.0128
GO:0090066	regulation of anatomical structure size	519	63	1.38	0.0128
GO:0006694	steroid biosynthetic process	197	28	1.65	0.013
GO:0045600	positive regulation of fat cell differentiation	72	13	2.19	0.013
GO:0002683	negative regulation of immune system process	463	57	1.41	0.0132
GO:0032946	positive regulation of mononuclear cell proliferation	137	21	1.81	0.0132
GO:1903038	negative regulation of leukocyte cell-cell adhesion	137	21	1.81	0.0132
GO:0043405	regulation of MAP kinase activity	342	44	1.48	0.0135
GO:0002576	platelet degranulation	129	20	1.83	0.0136
GO:0030033	microvillus assembly	11	4	5.69	0.0136
GO:0006857	oligopeptide transport	11	4	5.68	0.0137
GO:0019852	L-ascorbic acid metabolic process	11	4	5.68	0.0137
GO:0031652	positive regulation of heat generation	11	4	5.68	0.0137
GO:0070254	mucus secretion	11	4	5.68	0.0137
GO:0098656	anion transmembrane transport	156	23	1.74	0.0137
GO:2000392	regulation of lamellipodium morphogenesis	11	4	5.68	0.0137
GO:0010718	positive regulation of epithelial to mesenchymal transition	50	10	2.49	0.0139
GO:0050873	brown fat cell differentiation	50	10	2.49	0.0139
GO:0071715	icosanoid transport	50	10	2.49	0.0139
GO:1901571	fatty acid derivative transport	50	10	2.49	0.0139
GO:0045604	regulation of epidermal cell differentiation	65	12	2.25	0.014
GO:0051090	regulation of DNA-binding transcription factor activity	455	56	1.41	0.014
GO:0071356	cellular response to tumor necrosis factor	297	39	1.51	0.0141
GO:0001508	action potential	138	21	1.79	0.0142
GO:0043269	regulation of ion transport	705	82	1.32	0.0142
GO:0006959	humoral immune response	270	36	1.54	0.0143
GO:1903510	mucopolysaccharide metabolic process	113	18	1.89	0.0143
GO:0015701	bicarbonate transport	43	9	2.63	0.0144
GO:0043368	positive T cell selection	36	8	2.84	0.0144
GO:0060323	head morphogenesis	36	8	2.84	0.0144
GO:0086004	regulation of cardiac muscle cell contraction	43	9	2.63	0.0144
GO:0003018	vascular process in circulatory system	190	27	1.65	0.0145
GO:0050863	regulation of T cell activation	165	24	1.71	0.0145
GO:0051249	regulation of lymphocyte activation	263	35	1.55	0.0145
GO:0002253	activation of immune response	456	56	1.4	0.0146
GO:0120034	positive regulation of plasma membrane bounded cell projection assembly	89	15	2.02	0.0146
GO:0006766	vitamin metabolic process	130	20	1.81	0.0147
GO:0048514	blood vessel morphogenesis	706	82	1.32	0.0147
GO:0120162	positive regulation of cold-induced thermogenesis	97	16	1.97	0.0148
GO:0031294	lymphocyte costimulation	58	11	2.33	0.015
GO:0006163	purine nucleotide metabolic process	438	54	1.41	0.0151
GO:0006629	lipid metabolic process	163	23	1.72	0.0151
GO:0050673	epithelial cell proliferation	403	50	1.43	0.0154
GO:0022408	negative regulation of cell-cell adhesion	191	27	1.64	0.0155
GO:1903530	regulation of secretion by cell	293	38	1.51	0.0155
GO:0015732	prostaglandin transport	17	5	4.14	0.0156
GO:0019752	carboxylic acid metabolic process	950	106	1.27	0.0156
GO:0031268	pseudopodium organization	17	5	4.14	0.0156
GO:0045623	negative regulation of T-helper cell differentiation	17	5	4.14	0.0156
GO:0061158	3'-UTR-mediated mRNA destabilization	17	5	4.14	0.0156
GO:0098962	regulation of postsynaptic neurotransmitter receptor activity	17	5	4.14	0.0156
GO:0010675	regulation of cellular carbohydrate metabolic process	148	22	1.74	0.0159
GO:0030048	actin filament-based movement	30	7	3.05	0.0161
GO:0086003	cardiac muscle cell contraction	74	13	2.12	0.0162
GO:0097190	apoptotic signaling pathway	612	72	1.34	0.0163
GO:0007173	epidermal growth factor receptor signaling pathway	123	19	1.82	0.0164
GO:0030097	hemopoiesis	926	104	1.27	0.0165
GO:0044272	sulfur compound biosynthetic process	192	27	1.63	0.0165
GO:0009743	response to carbohydrate	228	31	1.57	0.0166
GO:0045939	negative regulation of steroid metabolic process	30	7	3.03	0.0166
GO:0071711	basement membrane organization	30	7	3.03	0.0166
GO:0030835	negative regulation of actin filament depolymerization	44	9	2.56	0.0167
GO:0045684	positive regulation of epidermis development	44	9	2.56	0.0167
GO:0120009	intermembrane lipid transfer	44	9	2.56	0.0167
GO:0140352	export from cell	53	10	2.4	0.0169
GO:1901652	response to peptide	536	64	1.36	0.0169
GO:0030595	leukocyte chemotaxis	116	18	1.85	0.0171
GO:0071900	regulation of protein serine/threonine kinase activity	527	63	1.36	0.0173
GO:0009617	response to bacterium	653	76	1.32	0.0175
GO:0002548	monocyte chemotaxis	67	12	2.17	0.0177
GO:0034341	response to interferon-gamma	202	28	1.61	0.0177
GO:0006644	phospholipid metabolic process	406	50	1.41	0.018
GO:0015914	phospholipid transport	91	15	1.97	0.018
GO:0030217	T cell differentiation	177	25	1.65	0.0183
GO:0007411	axon guidance	284	37	1.5	0.0184
GO:0015749	monosaccharide transmembrane transport	116	18	1.83	0.0184
GO:0043270	positive regulation of ion transport	284	37	1.5	0.0184
GO:0070665	positive regulation of leukocyte proliferation	150	22	1.71	0.0184
GO:0034505	tooth mineralization	24	6	3.31	0.0187
GO:0046628	positive regulation of insulin receptor signaling pathway	24	6	3.31	0.0187
GO:0006024	glycosaminoglycan biosynthetic process	108	17	1.86	0.0189
GO:0035239	tube morphogenesis	951	106	1.26	0.0189
GO:0120032	regulation of plasma membrane bounded cell projection assembly	177	25	1.65	0.0189
GO:0070486	leukocyte aggregation	12	4	4.97	0.019
GO:0090136	epithelial cell-cell adhesion	12	4	4.98	0.019
GO:0098657	import into cell	230	31	1.55	0.019
GO:0006534	cysteine metabolic process	12	4	4.97	0.0191
GO:0015780	nucleotide-sugar transmembrane transport	12	4	4.97	0.0191
GO:0016554	cytidine to uridine editing	12	4	4.97	0.0191
GO:0030311	poly-N-acetyllactosamine biosynthetic process	12	4	4.97	0.0191
GO:0033690	positive regulation of osteoblast proliferation	12	4	4.97	0.0191
GO:0042182	ketone catabolic process	12	4	4.97	0.0191
GO:0060081	membrane hyperpolarization	12	4	4.97	0.0191
GO:0070278	extracellular matrix constituent secretion	12	4	4.97	0.0191
GO:0072531	pyrimidine-containing compound transmembrane transport	12	4	4.97	0.0191
GO:0072540	T-helper 17 cell lineage commitment	12	4	4.97	0.0191
GO:0006775	fat-soluble vitamin metabolic process	45	9	2.49	0.0192
GO:0009117	nucleotide metabolic process	530	63	1.35	0.0192
GO:0097485	neuron projection guidance	285	37	1.49	0.0194
GO:0050867	positive regulation of cell activation	350	44	1.44	0.0195
GO:0006935	chemotaxis	280	36	1.5	0.0197
GO:0045582	positive regulation of T cell differentiation	92	15	1.94	0.0197
GO:2001056	positive regulation of cysteine-type endopeptidase activity	151	22	1.7	0.0197
GO:0002385	mucosal immune response	38	8	2.65	0.0198
GO:0046466	membrane lipid catabolic process	38	8	2.65	0.0198
GO:0050858	negative regulation of antigen receptor-mediated signaling pathway	31	7	2.9	0.0198
GO:0060325	face morphogenesis	31	7	2.9	0.0198
GO:0036149	phosphatidylinositol acyl-chain remodeling	18	5	3.82	0.02
GO:0051251	positive regulation of lymphocyte activation	286	37	1.48	0.0203
GO:0009968	negative regulation of signal transduction	1356	146	1.21	0.0204
GO:0019932	second-messenger-mediated signaling	234	31	1.54	0.0208
GO:2000514	regulation of CD4-positive, alpha-beta T cell activation	61	11	2.19	0.0213
GO:0003158	endothelium development	135	20	1.73	0.0215
GO:0046847	filopodium assembly	61	11	2.19	0.0215
GO:0043434	response to peptide hormone	447	54	1.37	0.0217
GO:0046883	regulation of hormone secretion	25	6	3.17	0.0217
GO:0032309	icosanoid secretion	46	9	2.42	0.022
GO:0045581	negative regulation of T cell differentiation	46	9	2.42	0.022
GO:0051489	regulation of filopodium assembly	46	9	2.42	0.022
GO:0061028	establishment of endothelial barrier	46	9	2.42	0.022
GO:0070371	ERK1 and ERK2 cascade	325	41	1.44	0.0223
GO:0001704	formation of primary germ layer	127	19	1.75	0.0224
GO:0010592	positive regulation of lamellipodium assembly	25	6	3.14	0.0227
GO:0014829	vascular associated smooth muscle contraction	25	6	3.14	0.0227
GO:1901135	carbohydrate derivative metabolic process	710	80	1.29	0.0228
GO:0002696	positive regulation of leukocyte activation	335	42	1.43	0.023
GO:0010837	regulation of keratinocyte proliferation	39	8	2.57	0.023
GO:0050671	positive regulation of lymphocyte proliferation	136	20	1.72	0.0231
GO:0051222	positive regulation of protein transport	354	44	1.42	0.0232
GO:0002274	myeloid leukocyte activation	662	76	1.3	0.0233
GO:0034694	response to prostaglandin	32	7	2.78	0.0234
GO:0046475	glycerophospholipid catabolic process	32	7	2.78	0.0234
GO:0038127	ERBB signaling pathway	145	21	1.69	0.0237
GO:0034284	response to monosaccharide	207	28	1.56	0.0238
GO:0035023	regulation of Rho protein signal transduction	86	14	1.94	0.024
GO:0097756	negative regulation of blood vessel diameter	86	14	1.94	0.024
GO:0051250	negative regulation of lymphocyte activation	154	22	1.66	0.0241
GO:1903509	liposaccharide metabolic process	111	17	1.8	0.0242
GO:0055088	lipid homeostasis	163	23	1.64	0.0245
GO:1990266	neutrophil migration	19	5	3.57	0.0245
GO:0032409	regulation of transporter activity	290	37	1.46	0.0247
GO:0015698	inorganic anion transport	172	24	1.62	0.0248
GO:0030183	B cell differentiation	137	20	1.7	0.0248
GO:0008284	positive regulation of cell population proliferation	973	107	1.24	0.0249
GO:1903532	positive regulation of secretion by cell	182	25	1.6	0.0249
GO:0006953	acute-phase response	47	9	2.36	0.025
GO:0042572	retinol metabolic process	47	9	2.36	0.025
GO:1901570	fatty acid derivative biosynthetic process	103	16	1.83	0.025
GO:0030050	vesicle transport along actin filament	19	5	3.55	0.0251
GO:0043373	CD4-positive, alpha-beta T cell lineage commitment	19	5	3.55	0.0251
GO:0051546	keratinocyte migration	19	5	3.55	0.0251
GO:0098911	regulation of ventricular cardiac muscle cell action potential	19	5	3.55	0.0251
GO:2000319	regulation of T-helper 17 cell differentiation	19	5	3.55	0.0251
GO:0015816	glycine transport	13	4	4.41	0.0256
GO:0016264	gap junction assembly	13	4	4.41	0.0256
GO:0030309	poly-N-acetyllactosamine metabolic process	13	4	4.41	0.0256
GO:0031274	positive regulation of pseudopodium assembly	13	4	4.41	0.0256
GO:0031650	regulation of heat generation	13	4	4.41	0.0256
GO:0033089	positive regulation of T cell differentiation in thymus	13	4	4.41	0.0256
GO:0048754	branching morphogenesis of an epithelial tube	155	22	1.65	0.0258
GO:0002720	positive regulation of cytokine production involved in immune response	55	10	2.21	0.0262
GO:0002028	regulation of sodium ion transport	87	14	1.91	0.0263
GO:0007257	activation of JUN kinase activity	40	8	2.49	0.0265
GO:0030501	positive regulation of bone mineralization	40	8	2.49	0.0265
GO:0071526	semaphorin-plexin signaling pathway	40	8	2.49	0.0265
GO:0090184	positive regulation of kidney development	40	8	2.49	0.0265
GO:0140353	lipid export from cell	40	8	2.49	0.0265
GO:1900371	regulation of purine nucleotide biosynthetic process	40	8	2.49	0.0265
GO:0015672	monovalent inorganic cation transport	549	64	1.32	0.0266
GO:0021675	nerve development	79	13	1.96	0.0267
GO:0099601	regulation of neurotransmitter receptor activity	79	13	1.96	0.0267
GO:0015908	fatty acid transport	26	6	3	0.0268
GO:0032412	regulation of ion transmembrane transporter activity	264	34	1.48	0.0268
GO:0043406	positive regulation of MAP kinase activity	264	34	1.48	0.0268
GO:0120035	regulation of plasma membrane bounded cell projection organization	696	79	1.28	0.0268
GO:0046486	glycerolipid metabolic process	359	44	1.4	0.0269
GO:0061180	mammary gland epithelium development	71	12	2.02	0.0269
GO:0010906	regulation of glucose metabolic process	121	18	1.74	0.0271
GO:0030036	actin cytoskeleton organization	212	28	1.54	0.0271
GO:0046467	membrane lipid biosynthetic process	147	21	1.66	0.0271
GO:0055123	digestive system development	147	21	1.66	0.0271
GO:0003382	epithelial cell morphogenesis	33	7	2.68	0.0272
GO:0032967	positive regulation of collagen biosynthetic process	26	6	2.98	0.0273
GO:0036152	phosphatidylethanolamine acyl-chain remodeling	26	6	2.98	0.0273
GO:0042730	fibrinolysis	26	6	2.98	0.0273
GO:0051016	barbed-end actin filament capping	26	6	2.98	0.0273
GO:0098542	defense response to other organism	1126	122	1.22	0.0273
GO:1901701	cellular response to oxygen-containing compound	1217	131	1.21	0.0273
GO:0006536	glutamate metabolic process	33	7	2.68	0.0274
GO:0030073	insulin secretion	139	20	1.68	0.0274
GO:0042339	keratan sulfate metabolic process	33	7	2.68	0.0274
GO:0008285	negative regulation of cell population proliferation	786	88	1.26	0.0276
GO:0045055	regulated exocytosis	796	89	1.26	0.0276
GO:0035088	establishment or maintenance of apical/basal cell polarity	48	9	2.3	0.0284
GO:0045981	positive regulation of nucleotide metabolic process	48	9	2.3	0.0284
GO:0046461	neutral lipid catabolic process	48	9	2.3	0.0284
GO:0046464	acylglycerol catabolic process	48	9	2.3	0.0284
GO:0061245	establishment or maintenance of bipolar cell polarity	48	9	2.3	0.0284
GO:1900544	positive regulation of purine nucleotide metabolic process	48	9	2.3	0.0284
GO:0002526	acute inflammatory response	80	13	1.94	0.0286
GO:0071345	cellular response to cytokine stimulus	328	40	1.42	0.0287
GO:0034113	heterotypic cell-cell adhesion	56	10	2.17	0.0289
GO:0022898	regulation of transmembrane transporter activity	275	35	1.46	0.0292
GO:0045621	positive regulation of lymphocyte differentiation	105	16	1.79	0.0293
GO:0001755	neural crest cell migration	56	10	2.16	0.0294
GO:0019320	hexose catabolic process	56	10	2.16	0.0294
GO:0086065	cell communication involved in cardiac conduction	56	10	2.16	0.0294
GO:0090183	regulation of kidney development	56	10	2.16	0.0294
GO:0045936	negative regulation of phosphate metabolic process	601	69	1.3	0.0295
GO:0030030	cell projection organization	1588	167	1.18	0.0296
GO:1901137	carbohydrate derivative biosynthetic process	555	64	1.31	0.0296
GO:0009746	response to hexose	202	27	1.54	0.0298
GO:0008645	hexose transmembrane transport	114	17	1.75	0.0304
GO:0030808	regulation of nucleotide biosynthetic process	41	8	2.41	0.0304
GO:0051693	actin filament capping	41	8	2.41	0.0304
GO:0089718	amino acid import across plasma membrane	41	8	2.41	0.0304
GO:1902476	chloride transmembrane transport	97	15	1.82	0.0304
GO:1990823	response to leukemia inhibitory factor	97	15	1.82	0.0304
GO:1990830	cellular response to leukemia inhibitory factor	97	15	1.82	0.0304
GO:0010563	negative regulation of phosphorus metabolic process	602	69	1.3	0.0305
GO:0006643	membrane lipid metabolic process	49	9	2.25	0.0309
GO:0032880	regulation of protein localization	950	104	1.23	0.0309
GO:0010878	cholesterol storage	20	5	3.31	0.031
GO:0060231	mesenchymal to epithelial transition	20	5	3.31	0.031
GO:2000193	positive regulation of fatty acid transport	20	5	3.31	0.031
GO:0010033	response to organic substance	565	63	1.31	0.0317
GO:0003012	muscle system process	467	55	1.33	0.0318
GO:0045087	innate immune response	911	100	1.24	0.0318
GO:0006658	phosphatidylserine metabolic process	34	7	2.58	0.0319
GO:0007094	mitotic spindle assembly checkpoint	34	7	2.58	0.0319
GO:0010922	positive regulation of phosphatase activity	34	7	2.58	0.0319
GO:0031577	spindle checkpoint	34	7	2.58	0.0319
GO:0035633	maintenance of blood-brain barrier	34	7	2.58	0.0319
GO:0035774	positive regulation of insulin secretion involved in cellular response to glucose stimulus	34	7	2.58	0.0319
GO:0048665	neuron fate specification	34	7	2.58	0.0319
GO:0070050	neuron cellular homeostasis	34	7	2.58	0.0319
GO:0071173	spindle assembly checkpoint	34	7	2.58	0.0319
GO:0071174	mitotic spindle checkpoint	34	7	2.58	0.0319
GO:0009101	glycoprotein biosynthetic process	90	14	1.85	0.032
GO:0010712	regulation of collagen metabolic process	49	9	2.24	0.032
GO:0032663	regulation of interleukin-2 production	49	9	2.24	0.032
GO:0019915	lipid storage	81	13	1.9	0.0321
GO:0006650	glycerophospholipid metabolic process	343	42	1.39	0.0323
GO:0044283	small molecule biosynthetic process	356	43	1.39	0.0323
GO:0010714	positive regulation of collagen metabolic process	27	6	2.84	0.0324
GO:0032897	negative regulation of viral transcription	27	6	2.84	0.0324
GO:0032355	response to estradiol	141	20	1.65	0.0326
GO:0098900	regulation of action potential	57	10	2.12	0.0328
GO:1905517	macrophage migration	57	10	2.12	0.0328
GO:0051345	positive regulation of hydrolase activity	367	44	1.38	0.0329
GO:0007588	excretion	65	11	2.03	0.033
GO:0003413	chondrocyte differentiation involved in endochondral bone morphogenesis	14	4	3.97	0.0333
GO:0009111	vitamin catabolic process	14	4	3.97	0.0333
GO:0014857	regulation of skeletal muscle cell proliferation	14	4	3.97	0.0333
GO:0030836	positive regulation of actin filament depolymerization	14	4	3.97	0.0333
GO:0031272	regulation of pseudopodium assembly	14	4	3.97	0.0333
GO:0032310	prostaglandin secretion	14	4	3.97	0.0333
GO:0034356	NAD biosynthesis via nicotinamide riboside salvage pathway	14	4	3.97	0.0333
GO:0050731	positive regulation of peptidyl-tyrosine phosphorylation	195	26	1.53	0.0333
GO:0060911	cardiac cell fate commitment	14	4	3.97	0.0333
GO:0070372	regulation of ERK1 and ERK2 cascade	306	38	1.42	0.0333
GO:0090231	regulation of spindle checkpoint	14	4	3.97	0.0333
GO:0090266	regulation of mitotic cell cycle spindle assembly checkpoint	14	4	3.97	0.0333
GO:1901160	primary amino compound metabolic process	14	4	3.97	0.0333
GO:1901569	fatty acid derivative catabolic process	14	4	3.97	0.0333
GO:1903504	regulation of mitotic spindle checkpoint	14	4	3.97	0.0333
GO:0071772	response to BMP	168	23	1.58	0.0334
GO:0071773	cellular response to BMP stimulus	168	23	1.58	0.0334
GO:0045597	positive regulation of cell differentiation	1034	112	1.22	0.0336
GO:0051347	positive regulation of transferase activity	694	78	1.27	0.0337
GO:0046427	positive regulation of receptor signaling pathway via JAK-STAT	90	14	1.83	0.0341
GO:0070542	response to fatty acid	90	14	1.83	0.0341
GO:0030148	sphingolipid biosynthetic process	107	16	1.75	0.0342
GO:1902622	regulation of neutrophil migration	42	8	2.34	0.0346
GO:0006006	glucose metabolic process	214	28	1.5	0.0348
GO:0016125	sterol metabolic process	169	23	1.57	0.0354
GO:0052126	movement in host environment	169	23	1.57	0.0354
GO:0051091	positive regulation of DNA-binding transcription factor activity	270	34	1.44	0.0356
GO:1903524	positive regulation of blood circulation	74	12	1.93	0.0357
GO:0045669	positive regulation of osteoblast differentiation	66	11	1.99	0.0364
GO:0045066	regulatory T cell differentiation	35	7	2.49	0.0368
GO:0140448	signaling receptor ligand precursor processing	35	7	2.49	0.0368
GO:0030258	lipid modification	271	34	1.43	0.0373
GO:0032102	negative regulation of response to external stimulus	433	51	1.33	0.0374
GO:0032874	positive regulation of stress-activated MAPK cascade	170	23	1.56	0.0376
GO:0002029	desensitization of G protein-coupled receptor signaling pathway	21	5	3.1	0.0377
GO:0002363	alpha-beta T cell lineage commitment	21	5	3.1	0.0377
GO:0006833	water transport	21	5	3.1	0.0377
GO:0016553	base conversion or substitution editing	21	5	3.1	0.0377
GO:0022401	negative adaptation of signaling pathway	21	5	3.1	0.0377
GO:0036150	phosphatidylserine acyl-chain remodeling	21	5	3.1	0.0377
GO:0051797	regulation of hair follicle development	21	5	3.1	0.0377
GO:0072574	hepatocyte proliferation	21	5	3.1	0.0377
GO:0072575	epithelial cell proliferation involved in liver morphogenesis	21	5	3.1	0.0377
GO:0099515	actin filament-based transport	21	5	3.1	0.0377
GO:0042391	regulation of membrane potential	443	52	1.33	0.0379
GO:0045446	endothelial cell differentiation	117	17	1.69	0.0379
GO:1904019	epithelial cell apoptotic process	117	17	1.69	0.0379
GO:0010575	positive regulation of vascular endothelial growth factor production	28	6	2.71	0.0382
GO:0044331	cell-cell adhesion mediated by cadherin	28	6	2.71	0.0382
GO:2000191	regulation of fatty acid transport	28	6	2.71	0.0382
GO:0002718	regulation of cytokine production involved in immune response	83	13	1.85	0.0383
GO:0044092	negative regulation of molecular function	1192	127	1.2	0.0383
GO:0048644	muscle organ morphogenesis	83	13	1.85	0.0383
GO:0006672	ceramide metabolic process	100	15	1.76	0.0385
GO:0050848	regulation of calcium-mediated signaling	100	15	1.76	0.0385
GO:0055114	oxidation-reduction process	1001	108	1.21	0.0385
GO:0070301	cellular response to hydrogen peroxide	100	15	1.76	0.0385
GO:0046890	regulation of lipid biosynthetic process	207	27	1.5	0.0389
GO:0098754	detoxification	135	19	1.63	0.0391
GO:0001933	negative regulation of protein phosphorylation	444	52	1.33	0.0392
GO:0045823	positive regulation of heart contraction	43	8	2.27	0.0392
GO:0071364	cellular response to epidermal growth factor stimulus	43	8	2.27	0.0392
GO:0009064	glutamine family amino acid metabolic process	75	12	1.9	0.0393
GO:0007369	gastrulation	189	25	1.52	0.0395
GO:0008203	cholesterol metabolic process	153	21	1.58	0.0397
GO:0030856	regulation of epithelial cell differentiation	171	23	1.55	0.0398
GO:0032890	regulation of organic acid transport	67	11	1.95	0.0401
GO:0072678	T cell migration	67	11	1.95	0.0401
GO:0097194	execution phase of apoptosis	92	14	1.79	0.0401
GO:0032873	negative regulation of stress-activated MAPK cascade	51	9	2.13	0.0403
GO:0045103	intermediate filament-based process	51	9	2.13	0.0403
GO:0070303	negative regulation of stress-activated protein kinase signaling cascade	51	9	2.13	0.0403
GO:0051058	negative regulation of small GTPase mediated signal transduction	59	10	2.03	0.0405
GO:0071385	cellular response to glucocorticoid stimulus	59	10	2.03	0.0405
GO:0042326	negative regulation of phosphorylation	484	56	1.31	0.0407
GO:0007596	blood coagulation	293	36	1.4	0.0409
GO:0051240	positive regulation of multicellular organismal process	1843	190	1.16	0.0409
GO:0010950	positive regulation of endopeptidase activity	181	24	1.52	0.0419
GO:0006633	fatty acid biosynthetic process	172	23	1.54	0.0421
GO:0030072	peptide hormone secretion	44	8	2.23	0.0421
GO:0070304	positive regulation of stress-activated protein kinase signaling cascade	172	23	1.54	0.0421
GO:0014856	skeletal muscle cell proliferation	15	4	3.61	0.0422
GO:0033623	regulation of integrin activation	15	4	3.61	0.0422
GO:0042976	activation of Janus kinase activity	15	4	3.61	0.0422
GO:0045841	negative regulation of mitotic metaphase/anaphase transition	36	7	2.4	0.0422
GO:0051238	sequestering of metal ion	15	4	3.61	0.0422
GO:0070831	basement membrane assembly	15	4	3.61	0.0422
GO:1900119	positive regulation of execution phase of apoptosis	15	4	3.61	0.0422
GO:2000402	negative regulation of lymphocyte migration	15	4	3.61	0.0422
GO:2001256	regulation of store-operated calcium entry	15	4	3.61	0.0422
GO:0022409	positive regulation of cell-cell adhesion	44	8	2.23	0.0424
GO:0033674	positive regulation of kinase activity	613	69	1.27	0.0424
GO:0030336	negative regulation of cell migration	350	42	1.36	0.0427
GO:1904659	glucose transmembrane transport	110	16	1.69	0.0427
GO:1903035	negative regulation of response to wounding	93	14	1.76	0.0434
GO:1904894	positive regulation of receptor signaling pathway via STAT	93	14	1.76	0.0434
GO:0032872	regulation of stress-activated MAPK cascade	237	30	1.44	0.0435
GO:1904951	positive regulation of establishment of protein localization	370	44	1.35	0.044
GO:0072089	stem cell proliferation	128	18	1.63	0.0441
GO:1903037	regulation of leukocyte cell-cell adhesion	94	14	1.76	0.0441
GO:0032620	interleukin-17 production	44	8	2.21	0.0442
GO:0032965	regulation of collagen biosynthetic process	44	8	2.21	0.0442
GO:0045332	phospholipid translocation	44	8	2.21	0.0442
GO:0060612	adipose tissue development	44	8	2.21	0.0442
GO:0071346	cellular response to interferon-gamma	182	24	1.51	0.0443
GO:0007263	nitric oxide mediated signal transduction	29	6	2.59	0.0445
GO:0008209	androgen metabolic process	29	6	2.59	0.0445
GO:0015721	bile acid and bile salt transport	29	6	2.59	0.0445
GO:0036151	phosphatidylcholine acyl-chain remodeling	29	6	2.59	0.0445
GO:0048240	sperm capacitation	29	6	2.59	0.0445
GO:0050855	regulation of B cell receptor signaling pathway	29	6	2.59	0.0445
GO:0060351	cartilage development involved in endochondral bone morphogenesis	29	6	2.59	0.0445
GO:0071624	positive regulation of granulocyte chemotaxis	29	6	2.59	0.0445
GO:0031960	response to corticosteroid	164	22	1.54	0.0447
GO:0150115	cell-substrate junction organization	102	15	1.72	0.0448
GO:0009948	anterior/posterior axis specification	52	9	2.08	0.0449
GO:0010883	regulation of lipid storage	52	9	2.08	0.0449
GO:0071622	regulation of granulocyte chemotaxis	52	9	2.08	0.0449
GO:0006970	response to osmotic stress	85	13	1.8	0.0452
GO:0023058	adaptation of signaling pathway	22	5	2.92	0.0452
GO:0032402	melanosome transport	22	5	2.92	0.0452
GO:0045061	thymic T cell selection	22	5	2.92	0.0452
GO:0045980	negative regulation of nucleotide metabolic process	22	5	2.92	0.0452
GO:0072576	liver morphogenesis	22	5	2.92	0.0452
GO:2000316	regulation of T-helper 17 type immune response	22	5	2.92	0.0452
GO:1902532	negative regulation of intracellular signal transduction	556	63	1.28	0.0453
GO:0070848	response to growth factor	745	82	1.24	0.0456
GO:0010952	positive regulation of peptidase activity	201	26	1.48	0.0458
GO:0042113	B cell activation	257	32	1.42	0.0461
GO:0044057	regulation of system process	626	70	1.26	0.0463
GO:0002366	leukocyte activation involved in immune response	716	79	1.24	0.0468
GO:0007589	body fluid secretion	94	14	1.74	0.0469
GO:1904035	regulation of epithelial cell apoptotic process	94	14	1.74	0.0469
GO:0046330	positive regulation of JNK cascade	138	19	1.59	0.0473
GO:0072329	monocarboxylic acid catabolic process	138	19	1.59	0.0473
GO:0006882	cellular zinc ion homeostasis	37	7	2.32	0.0481
GO:1902100	negative regulation of metaphase/anaphase transition of cell cycle	37	7	2.32	0.0481
GO:0032496	response to lipopolysaccharide	334	40	1.36	0.0482
GO:1901568	fatty acid derivative metabolic process	53	9	2.05	0.0482
GO:0036230	granulocyte activation	509	58	1.28	0.0484
GO:0010243	response to organonitrogen compound	1061	113	1.19	0.049
GO:0001659	temperature homeostasis	157	21	1.54	0.0491
GO:0002695	negative regulation of leukocyte activation	184	24	1.49	0.0492
GO:0050778	positive regulation of immune response	658	73	1.25	0.0492
GO:0046888	negative regulation of hormone secretion	61	10	1.95	0.0494
GO:0006897	endocytosis	569	64	1.27	0.0497
GO:0098661	inorganic anion transmembrane transport	121	17	1.63	0.0497
GO:0070302	regulation of stress-activated protein kinase signaling cascade	240	30	1.42	0.0499
